# Supplementary material for: A Comprehensive Expressed Sequence Tag Linkage Map for Tiger Salamander and Mexican Axolotl: Enabling Gene Mapping and Comparative Genomics in Ambystoma
Source: Oxford University Press journal article supplement (doi:10.1534/genetics.105.046433), 2005-08-04
Supplement: aflpsonmap.doc [file aflpsonmap.doc]

Primer Pair Locus Prefix

E-acgg / M-caca A1

E-acgg / M-cacg A2

E-acgg / M-cact A3

E-acga / M-cacc A4

E-acgg / M-cacc A5

E-acga / M-caca A6

N-aag / H-cac A7

E-acga / H-cacg A8

N-aag / H-tac A9

N-aag / H-aac A10

N-aag / H-ata A11

N-agg / H-aac A12

N-agg / H-ata A13

N-agg / H-cac A14

N-agg / H-tac A15

N-aca / H-aac A16

N-aca / H-cac A17

N-aca / H-tac A18

N-aca / H-ata A19

N-aat / H-ata A20

N-aat / H-tac A21

N-att / H-ata A24

N-att / H-tac A25

N-att / H-aac A26

E-acgc / M-ctac A27

E-acga / M-cact A28

E-acgt / M-cact A29

E-acgt / M-caca A30

E-acgt / M-cacc A31

E-acgt / M-cacg A32

E-acgc / M-caca A33

E-acgc / M-cacc A34

E-acgc / M-cacg A35

E-acgc / M-cact A36

N-aag / H-cat A37

N-agg / H-cat A38

N-aca / H-cat A39

N-att / H-cat A40

E-acgt / M-ctac A45

E-acgg / M-ctag A50

E-acgg / M-ctat A52

E-acgg / M-ctac A53

N-tgc / H-cat A54

N-tgc / H-tac A55

N-tgc / H-ata A56

# N-tgc / H-cac A57_______

E, H, M, and N are digest specific primers (GACTGCGTACCAATTC, GGCGAATCCTAAGCGG, GTAGAGTCCTGAGTAA, and GACTGCGTATTGGCCGC respectively) followed by selective bases.
