# Supplementary material for: A Comprehensive Expressed Sequence Tag Linkage Map for Tiger Salamander and Mexican Axolotl: Enabling Gene Mapping and Comparative Genomics in Ambystoma
Source: Oxford University Press journal article supplement (doi:10.1534/genetics.105.046433), 2005-08-04
Supplement: supplementary_table_1.xls [file supplementary_table_1.xls]

## Sheet: Sheet1
LGa	cMb	Marker	Primer	Polymorphism Detection Methodc	# Genotyped	NCBI Gisd
1	0	E20A12	F - CTCTGCATCAAATGCCACAC	PE - CTGAGCTTCCACCCCTGGTGTAC (A/C)	83	45831626, 45837846, 45844697; 45810787
			R - GTTCTCCTATTGCAGAAACTGGAT
1	45	G2M17	F - TGCTCGGCTTTGACCAGTTCCT	RD - BsuR I	91	45817670, 45818283, 45819355, 45819841, 45835859; 15951247, 15951458, 45806357, 45807256, 45807268, 45807464, 45807916, 45808823, 45809449, 45810671, 45811729, 45813088, 45813186, 45813622, 45814108, 45815265, 45816055, 45816321, 45816421, 45816791, 45817129, 45817171, 45820880, 45821072, 45821450, 45821496, 45821549, 45821581, 45821688
			R - ACAGCCGTTTGCATCTTCGTG
1	63.1	Gapdh	F - AACGCCTCCTGCACCACCAACT	RD - Dpn II	60	45817427, 45818807; 15951122, 15951528, 15951533, 16305064, 45805401, 45806900, 45809215, 45810483, 45812837, 45814678, 45815049, 45815314, 45816108, 45822136, 50994401, 50995520, 50995752, 50997827, 51001240, 51005497, 51005839, 51005900, 51006719, 51007233, 51008148, 51008182, 51008854, 51008869, 51009583, 51010304, 51010523, 51010572, 51010830
			R - CTCTGCCATCGCGCCACATTT
1	66.7	E24C6	F - CTGTTCTATTGAGTGGTTTCACTTCG	TGCGE	81	45831241, 45831662, 45836267; 50993620, 50998250, 51003181
			R - GTAGAGCTGAAATTGATACCTTGTCA
1	71.9	E5G11	F - CAAGGAATAGACTACTGATTGTCCTG	TGCGE	88	45817559, 45817641, 45817888, 45838385; 15951122, 15951533, 45806900, 45807004, 45807686, 45810483, 45812837, 45814678, 45815049, 45815314, 45816108, 45820995, 45822136
			R - TTTCTCATTTACAGTTTTACAGATGG
1	87.8	E17C11	F - TATCTGTCGTAGTTTCCAGACACATT	ASA	91	45831094; 51009302
			R - AGCCATTAGATTCTTCAAAACTGAAC
1	94.7	E16A12	F - TGGTATGATATTTTGGTGTTCTCCTA	PE - TCGCCAAGCATGGACATGGTTCC (T/C)	88	45829306, 45835395; 45816306, 51004113, 51005290
			R - CAGTTGCATTAAAAATGTAGAGGAAA
1	95.9	E23C5	F - TTAAAGCCATGATTATGTGTAAAGGA	PE - TACACAGAGCTTTGATGGTCCTATACGGT (C/A)	83	45835460
			R - AGCTTCTTTTGTTAAGTAGACGATCC
1	107.8	cntg26	F - GCACCGGGCATCCTGGCATCATT	RD - Mnl I	87	45818504, 45820048, 45829249, 45829606, 45830348, 45832892, 45835114, 45835623, 45836092, 45838219; 15951104, 15951421, 45805897, 45807160, 45807166, 45809863, 45815183, 45815730, 45815883, 45820424, 45822187, 50994627, 50995026, 50997874, 50998016, 50998367, 50998822, 51000443, 51000595, 51000739, 51001042, 51003397, 51007851, 51008004, 51008124, 51010094, 51010282
			R - GGCATCCAGGTAAAAGCAGTCCGTTCA
1	126.3	E24C10	F - GTGTTTCGAACTCCTTATTTCTCATT	PE - CTGTCGCTCAGCAGTGAGAAAAGTG (A/G)	84	45834114; 45809290
			R - GATTTGGATACAGTTGATTTTACGAA
1	153.8	E20C6	F - TTACTATGTTTAGCCGTTTCATCAAG	TGCGE	90	45835304, 45837702, 45837780, 45837783, 45837989, 45838685, 45838773, 45840296, 45844474; 51002466, 51004016, 51006752, 51009213, 51009472, 51010599, 51010670
			R - TGCTTCTACTAAAGTTATGTTGGTGG
1	160.6	E22E10	F - CTATAGCATCAAAGTAATCCTGCAA	PE - TCAGAGTACTGGAAAGGAGTTCCTGTTCA (T/A)	88	45828986, 45833228, 45834375, 45841576, 45844156; 45815130
			R - ACTAGAAGTTCAACAATGCAGACAGT
1	160.6	E6G8	F - AATAAGCAACAAGACATTCCTCTACC	PE - ACACCCTGACAAGCACCTCCC (T/C)	87	45829992, 45831698, 45835990, 45838652; 45804582, 45805815, 45806169, 45806693, 45807244, 45807765, 45808888, 45808932, 45809210, 45809725, 45811977, 45812538, 45812604, 45812828, 45813600, 45814105, 45814757, 45815843, 45816486, 45816605, 51003393, 51008831, 51010051
			R - GAGAAGTAGGTAGATTCATGCAACAG
1	188.5	E7G8	F - GAGTATTGTTTGAAACTGGGTAGACA	PE - TTCCCAATTTGTTACCAGCCCATCTC (T/C)	90	45834202, 45844204; 45814291, 50993852, 50994214, 50995343, 50995593, 50996230, 50997046, 50998101, 50998284, 50998319, 50999696, 51001398, 51002508, 51007904
			R - GGTACAACCTAGTTCAGGTTCTTAGG
1	212.7	E20G12	F - AGCTACAAGAGCATATTTTGACCTTC	TGCGE	91	45832988; 51000151
			R - CCTACTTGGAAGAAAATGTGTCTCA
1	222.9	E8C10	F - TCTATCGTACAGACTCTCATCCTTGT	PE - GGAATTTGGCAAATGAGACATCTTAAGGG (C/A)	90	45828979, 45834704, 45834776, 45834917, 45837053, 45844572, 45844884, 45844982, 45845402; 15951411, 45810862, 45810863, 45814991, 50997504, 50999975, 51000514, 51002019, 51003304, 51008472, 51009059
			R - CTAGTCTGTGCAAGTTTTCAGTGAG
1	224	E21G9	F - ATGTCACTCTAGTGTGCAAACCTC	PE - GTTTGAAGGAAGTGGCTGCAATGGAG (G/T)	88	45827980, 45828635, 45830188, 45832029, 45832976, 45839586; 15951428
			R - GAGTTAAGCGAGGAAAATACCAGTAG
1	235.2	E20A6	F - CATGTGAAAATATGAACTTTTCTTGG	PE - GTCCTCCTGGTCCATCAGGTTTGGA (A/T)	83	45838172; 51001030, 51001037, 51002783, 51003982, 51005634, 51007791, 51009285, 51010003, 51010531
			R - TGAAAAACCACCACAAACTAAAATAA
1	241.3	E18E8	F - AAATGGATCTACGAGTAGACCTTGAC	PE - GGGTCCCACACAGAAGGCCCTTAA (C/G)	86	45817339, 45817659, 45818489, 45819578, 45820028, 45820147, 45829602; 15951466, 15951540, 45804488, 45804774, 45804780, 45805137, 45805694, 45806665, 45807109, 45807299, 45807352, 45807646, 45807690, 45807752, 45807807, 45807984, 45808123, 45808797, 45808829, 45809283, 45809498, 45809916, 45810049, 45810431, 45810693, 45811071, 45811711, 45811838, 45812112, 45813178, 45813262, 45813724, 45813727,…
			R - TGAATTTATTACAAAGTGCTTTGAGC
1	242.6	E10C9	F - AAAGTGCCAAGAAGGAGATTAACTT	PE - AAATGGATCTACGAGTAGACCTTGACCC (G/T)	90	45817339, 45817659, 45818489, 45819578, 45820028, 45820147, 45829602; 15951466, 15951540, 45804488, 45804774, 45804780, 45805137, 45805694, 45806665, 45807109, 45807299, 45807352, 45807646, 45807690, 45807752, 45807807, 45807984, 45808123, 45808797, 45808829, 45809283, 45809498, 45809916, 45810049, 45810431, 45810693, 45811071, 45811711, 45811838, 45812112, 45813178, 45813262, 45813724, 45813727,…
			R - GAGCTCAGAAAACAAGGCAGTAAC
1	242.6	E19C4	F - AATGCTGTCAGAGTGGCTAGAATAC	PE - GCATGCCCCTCTTGGAAGTGACAG (C/T)	83	45817611, 45834230, 45837033, 45837449, 45843157, 45843633; 15951541, 45803975, 45804018, 45804659, 45806325, 45807298, 45807345, 45808502, 45809698, 45811178, 45812751, 45812752, 45813419, 45814810, 45814878, 45815770, 45815781, 45815894, 45820890, 45821457, 51001444, 51004028, 51005078, 51005111, 51006865, 51007681, 51007803, 51008009, 51010616
			R - TGATACTTTATCTACCATGCTTGCTT
1	242.6	E8C1	F - GTACACATCTGTGTGTCTCGCTT	PE - CCACCTCAATCGAGTCCCCAGC (G/A)	85	45817443, 45817466, 45818435, 45818770, 45818881, 45819384, 45837085, 45837086, 45837105, 45837365, 45837957, 45838244, 45838420, 45838695, 45839042, 45839194, 45840103, 45840853, 45841060, 45841487, 45841552, 45841672, 45842233, 45844144, 45844214, 45845086, 45845191, 45845207, 45845351, 45845476; 15951240, 15951498, 45803467, 45803668, 45803832, 45803915, 45804146, 45804161, 45804181, 45804590,…
			R - TCTAGGATTCTAAATCCACCCACTAC
1	244.8	E11G12	F - GTGTGAAACTACCCAACATCACTTAC	TGCGE	89	45818010; 45809137
			R - CCGATCACAGATGTATAAAGAAGAGT
1	247.1	E13C8	F - CTAATCTGTACTGCACATGGAACTCT	TGCGE	88	45829430; 51010704
			R - AGAGGTTTTTCTTGTACTGTATGGCT
1	248.3	G1C5	F - CACTGTTGACTTGGGTTATGTTATT	RD - Fnu4H I	78	15950911
			R - CTGCTCCTAGGGTTTGTGAAG
1	248.3	E16E3	F - GTCTCTAAAACGCAAACAAACTAGC	TGCGE	89	45831964, 45835334; 51002161
			R - CAGTCTCAATAGTGGATCCTACTTCA
1	260.5	E19C1	F - AGCTGCTGGAGAATCCCTCT	PE - AGCGCCAGGTGTAGCCACTCA (T/G)	87	45817443, 45817466, 45818435, 45818770, 45818881, 45819384, 45837085, 45837086, 45837105, 45837365, 45837957, 45838244, 45838420, 45838695, 45839042, 45839194, 45840103, 45840853, 45841060, 45841487, 45841552, 45841672, 45842233, 45844144, 45844214, 45845086, 45845191, 45845207, 45845351, 45845476; 15951240, 15951498, 45803467, 45803668, 45803832, 45803915, 45804146, 45804161, 45804181, 45804590,…
			R - TCTAGGATTCTAAATCCACCCACTAC
1	297.8	E22C12	F - AAGACTTATCAATGCACTGTTTGC	PE - TGAAGATTTGACCTGCGGTCTGTGC (A/C)	57	45837343, 45838388, 45839681, 45840158, 45841434, 45841718, 45842365, 45842660, 45844497, 45844744, 45844808; 45803425, 45809427, 45809616, 45811369, 45812525, 45814627, 50994011, 50994012, 50994167, 50994331, 50994396, 50994514, 50994539, 50994559, 50994575, 50994581, 50994586, 50994601, 50994608, 50994929, 50994995, 50995074, 50995134, 50995387, 50995428, 50995475, 50995689, 50995897, 50996018,…
			R - GTGTAGAGCTCAGGATTGACCTGTT
1	313.1	E13C10	F - TAGTGTGATCACTTATGTCCCAAAAC	PE - GCAAAGGATGCGGTCAGCAGAGAC (C/T)	77	45831720, 45838967, 45843406; 51003793, 51006358
			R - TACTAACCCCAGCTTTAGTCTCATTT
1	326.4	E15E5	F - ATCACTCTGAACCTATTTCTCTTGGT	TGCGE	91	45830902, 45832675; 45807787, 51006272, 51008774, 51010602
			R - GTAAGCAAATCACAATGGAAAACTAA
1	342.4	E7A6	F - TCTTTCTTTCGACTGTTTTGTACATC	PE - CACAGGGTCTTCTGAACAAGGAATCAA (G/T)	84	45828008; 50997316, 51004129, 51006772
			R - ACATAGTGTGTGTTATGTTGGTGCTT
1	352.4	E20G3	F - AGGAGGAAGGATATCTCCAAGTATG	PE - CGATGTGAAGAAGAGACAATTCATTGCTTG (C/A)	87	45818412, 45818767; 45815366
			R - GGACTGCTCAATTTACTGAATATTTTT
1	396	E13E11	F - TATTTTCATATGGAGCATAATCCTGA	PE - GCTACATAGACTGCCAGACAACACTACAAA (G/A)	87	45818269, 45828860; 50996032
			R - TCCAGCTGTTAAAAGTTATCGTACTG
1	401	E18C5	F - CAGTCATCAGAATAACTACAAGCCAT	PE - ATTTCAGAGACTGCACAGGTTTTGTAAAC (G/A)	85	45837394, 45838906, 45839920, 45841980, 45844005; 15951021, 15951345, 45804148, 45804646, 45804664, 45811505, 45811610, 45812890, 45815766, 45816338, 50993671, 50993720, 50993760, 50993806, 50993820, 50993836, 50993917, 50993965, 50994170, 50994180, 50994225, 50994269, 50994283, 50994285, 50994350, 50994382, 50994393, 50994433, 50994474, 50994672, 50994683, 50994689, 50994998, 50995014, 50995055,…
			R - ACTTAAAAATATTTCCAGGGGAGTTT
1	409.6	E12A5	F - ACCTTCATTCTTTTGAAATCTTGTCT	PE - TGAAATCTTGTCTAATGAGATAAAACAAAC (G/A)	83	45836496; 45810547
			R - TGTGGATGACCAATATTAGTTGAAAT
1	409.6	E14G1	F - GTTGGGTTAGTAGTCAATGCTGTAGA	TGCGE	88	45834632, 45840464; 45811044
			R - AAGAGGAACCATGTACTTTTACTGCT
1	414.4	E12C9	F - ACTACAGAGATCGAGAAATTAGAGGG	PE - ACACTACCCCCTTTGACTATCCCACAA (A/C)	89	45834528, 45845453; 50996043
			R - CAGACAGAAGTCACACTCTCCTACTC
1	419	E16C5	F - TTTATGCTCTAAACCTGAGTGTATGC	TGCGE	90	45834860; 45814493, 51003505
			R - ATAAAAAGCACTACCGTTTTCAGTTT
1	461.4	E19E4	F - GTTTTTGTTATACCCTGTTGGCTTAT	TGCGE	91	45832720, 45833130, 45835270, 45838985, 45840001, 45843500; 50997613, 51004566, 51007473, 51008428, 51009363
			R - ATTTAAAACACGTATCCTACACCACA
1	477	Hoxc10	F - TGCCCATACAGCGAGCTTACAGACAT	RD - Pst I	91	11037555, 11037557
			R - GCACACGAGACCCACAACAACAAAA
1	487.1	E18A10	F - ATGAGGACAATGATGTAACTGGATTA	PE - CAGAGGGAATAGAATAGATGTGATTGACAT (C/A)	74	45838141, 45838432, 45839778, 45840204, 45840612, 45840654, 45840986, 45841260, 45841829, 45842128, 45842466, 45842494, 45842602, 45842609, 45842682, 45842843, 45843213, 45843524, 45844128, 45844321, 45844923, 45844954; 45803941, 45804248, 45804764, 45804821, 45804833, 45805095, 45805124, 45805263, 45805746, 45806315, 45806999, 45807228, 45807730, 45808698, 45808864, 45809400, 45809637, 45811246,…
			R - TATCGAAATAGTACATCACCAGCTTC
1	487.1	E18A12	F - ACTCACACACAATCTGTCTAAATTCC	PE - GTGCTGGCAATAAGCTTCCATCATACATAG (T/G)	80	45831158, 45836786, 45836800, 45836983, 45837081, 45837815, 45838092, 45838211, 45838503, 45838984, 45838997, 45839306, 45839534, 45839574, 45839781, 45840086, 45840289, 45840621, 45840949, 45841031, 45841332, 45841386, 45841387, 45841409, 45841627, 45841983, 45842164, 45842203, 45842308, 45842435, 45842647, 45842728, 45842862, 45843492, 45843636, 45843781, 45843965, 45844113, 45844122, 45844527,…
			R - ATTACCTCTGATCTGAATGGAAGAGT
1	489.7	E23G3	F - GAGAGCAATTACCGGTTTGTGT	TGCGE	88	45840950; 51003769, 51010400
			R - ATTAGACCAGACTGACTGAGCAATTA
1	507.9	E9E7	F - AACTGGTCCGGATGGTGATA	TGCGE	90	45817670, 45818283, 45819355; 15951247, 15951458, 45806357, 45807256, 45807268, 45807464, 45807916, 45808823, 45809449, 45810671, 45813088, 45813186, 45813622, 45814108, 45815265, 45816055, 45816321, 45816791, 45817129, 45817171, 45820880, 45821072, 45821450, 45821496, 45821549, 45821581, 45821688
			R - AACAGGTACAAGAAACCAGATCTACC
1	516.1	Wnt1	F - CAGCGCCAAATCACACCTCA	RD – Hinc II	88	62424
			R - TCCATAAACGCTGCCAAAATAAAG
1	534.2	E21G8	F - ATGCCATCCAGTATTCTCGC	PE - TCCTGCATTCTCACCGGGGGTTAT (G/A)	88	45834604, 45836678, 45837604, 45843156, 45843368; 15950933, 45804667, 45807309, 45808469, 45816744, 50995121, 51004062, 51005429, 51007587, 51007806
			R - CTTGTATCGGCAACAGATTAAAAGTA
1	544.6	cntg116	F - GCGCCTGGAAGCTGGAGACC	RD - Dpn II	42	45827872, 45828999, 45831959, 45836936, 45836943, 45836978, 45837577, 45837677, 45837706, 45837716, 45837718, 45837768, 45838003, 45838275, 45839074, 45839178, 45839250, 45839466, 45840398, 45841218, 45841232, 45841280, 45842178, 45843259, 45843784, 45844231, 45844266, 45844267, 45844378, 45844434, 45845025; 15950874, 15950877, 15950892, 15951143, 15951152, 45803959, 45804072, 45805885, 45806737,…
			R - TGGGGCACGGAGGGGAGACA
1	564.7	E5C5	F - CACAGATGTTGGAGAGTATGATTAAGA	TGCGE	91	15951284, 45809634, 45809726, 45813778, 51004694, 51004881, 51009263
			R - TAGCTGTAGCTAAGCACTTAAAGGAAG
1	569.3	E16C6	F - GTTTGGAGTCTCCTACCATTGTAACT	PE - GACTAGATTGATCAAGCAGTTGGCCCTAA (C/A)	86	45836338; 45816384
			R - CAAGAAGCAGTTTCTGACTGATTTAG
1	570.5	E12C6	F - AAACTGCAACATAATGAAAGCCTAC	PE - GCTGCACCTCTGATCTCTGCAACT (A/G)	88	45819793, 45831285; 45808037, 45811495, 45814417, 45815166, 45820864
			R - GAGAGTAGAGAGGTATTTAGGCAACC
1	576.4	E20C7	F - GGGTAGAAAGTTATCCTGGTGAAATA	TGCGE	90	45837089; 45810539, 50997695, 51002216, 51004858, 51005767, 51005851, 51006161, 51006774, 51009104
			R - CTACATTACCAGATCCCACAGAAAAT
1	597.8	E9C4	F - GTGGTTATTTGTAACATTTCGTTGAC	PE - TTTTTAAACGCGTAAAAATGTTAACAGA (G/A)	86	45828384, 45829264, 45829957, 45830562, 45830613, 45831381, 45833309, 45833816, 45833981, 45835175, 45835193, 45835605, 45839535, 45840979, 45841482, 45841567, 45842107, 45842918, 45843192, 45843405, 45844921, 45844949; 45804141, 45804759, 45806066, 45807403, 45808263, 45809768, 45810027, 45811529, 45815779, 45815934, 45820913, 45821508, 50993740, 50993932, 50994037, 50994092, 50994227, 50994243,…
			R - AATTACATTTGGGCTTCTCAATTTAC
1	729.6	ETG990	F - GTTTAGGTTAGTATGAAGGATCCCAA	PE - CCCTAGATCTCCAAAGTTCACATGCA (C/T)	86	45837087, 45838367, 45838586, 45838752, 45839580, 45840069, 45840362, 45840596, 45840628, 45841531, 45841824, 45842346, 45842427, 45842867, 45843319, 45843399, 45843882, 45844263, 45845040, 45845052; 15951072, 15951203, 45806385, 45806541, 45808102, 45809085, 45810443, 45811293, 45811678, 45813596, 45815210, 50993509, 50994063, 50994141, 50994422, 50994488, 50994530, 50994632, 50994649, 50995182,…
			R - TGCCAGTACTCACCAATTAGTAAAAG
1	734.6	E13E4	F - AGGCCACCTTTAGTGAATATATCAAG	PE - ATAAATCTGATTTACTGTATGTGGTAAATA (T/G)	84	45818559, 45818566; 45808820
			R - AGGACAATCTAGAACAAATGGAAAAC
1	734.6	nt001cb10	F - TGTGTTCAGTTTAAAATTTTGTTTCA	RD - Mse I	91	51003443
			R - TCTTTACCAAGTTCTCCTTTGAAAAT
1	735.7	E24E9	F - AACTGCTGCTAAGACTGCAAATC	PE - AATAAGTGTGGAGAACATAACACATTCACA (C/A)	91	45832259
			R - GGAATAATCAACACAACTAGTCTCCA
1	742.4	E24G7	F - AGAGAAACCTTACCAGTGCAATACAT	PE - GTTAGAATTTCTTGCTCAATTTAAGCAAAC (A/C)	90	45829439
			R - AACCTTTTTCTATTGGATGTGGAG
1	747.2	E13G1	F - TATATATCGTATACACAAGCACGGGT	TGCGE	86	45832346; 45810878, 50997972, 51001903
			R - ATGTCCCCTATATGCAATTATCTTTC
1	755.4	E6C6	F - CTGATCTAGAAGACGAGGATGATGAC	TGCGE	87	45819836, 45838998; 15950819, 15950833, 45807490, 45808357, 45809395, 45809625, 45810253, 45811355, 45811494, 45813363, 45816058, 45816731, 50993902, 50995552, 50995937, 50997037, 50997553, 50998410, 51001432, 51003779, 51004224, 51005105, 51005221, 51005932, 51005962, 51006168, 51006501, 51006827, 51006841, 51007321, 51007359, 51007366, 51007631, 51007671, 51008065, 51008305, 51008721, 51008734,…
			R - AAAAATTAAATATCCTGCAGAACCC
1	766.5	E22A7	F - CAGAGCTGCCGAAGTTGAC	PE - GGACTGTTGTGTCTAGTTCAGCATGAGG (T/A)	85	45834431
			R - GTCCCCAAACCCCTGTCAT
1	772.9	E13A5	F - GATTGCATGTAATTCAAAGAATATGG	TGCGE	85	45836000; 45811385, 50997286
			R - GGACAATTATAGAATCGTTTAGGCTC
1	780.5	E12C8	F - GACTGTCATTAGGCATGTTAGTAGGA	ASA	86	45836720; 45808541, 45812515, 50994091
			R - ATCTGCATATGTCCGATTGTTAGTAG
1	798.9	E24E3	F - CTTTTCACGAGAAATATAAGGCTCAG	PE - TTTTAAGCTTTTTCCAAAGTTTCCAGAAGA (A/C)	89	45834430, 45835952; 51005896
			R - GATATTATGGCAGGGTCAGGTTTAT
1	803.4	E11C1	F - CTCTGAGGAGAATGAGAAGCTATTTG	PE - CCTCTACCATGACGACAGCCTTGTATTT (A/C)	91	45833038; 50995073, 51009467
			R - TTCTAGAGGAGATGGCAGTTCA
1	803.4	E7C12	F - CACATTCTAAGAAGCTGGTTTTCAAT	TGCGE	91	45831146, 45835634, 45843142; 45811852, 50995914, 51001861, 51002333
			R - ATTCCTGTTTGTATGCACTGTCAAC
1	806.9	E10A4	F - ATGATCAAATATGGCATCAACAAC	PE - CACAAGGTGAACCTGCAGATGGTCTA (T/C)	86	45828552, 45829105, 45843413; 45815897, 51000209, 51007153, 51009246
			R - ATCCCGCAGAATAAATAAATAATGTC
1	815.5	G2I16	F - CTTCCTTCCTTCGAGCTGGTGTCTA	RD - BsuR I	92	15951180
			R - TGAGGTGCATGATGGTCTTTG
1	828.1	E14C7	F - TGCTCTATTGTTGGGATTTAGTACAC	PE - GCCATGTCACCCAGGTAGCTTCG (A/G)	85	45831605, 45833756; 51010336
			R - GTAAACAAAGATCATAGTGCAAGGTG
1	836.7	E19C7	F - CAACACTGATCTTTCTTCATTCTCTC	PE - GGAGCAGTCCGAGAAGGTGATCG (C/T)	88	45832799, 45833299, 45834590, 45837812, 45838182, 45841431, 45842207, 45844142; 45809999, 50994504, 50996864, 50998390, 50998445, 51001978, 51002385, 51002486, 51003128, 51003483, 51004086
			R - TGGTGTTTAAGGTCTTCCTATCTTCT
1	-	E6A3	F - AGAGGACTTAAAAATACCACAAATCC	PE - GTTACTTAACCTCTTCCCCACAGCTG (A/T)	60	45818504, 45820048, 45829249, 45829606, 45830348, 45832892, 45835114, 45835623, 45836092, 45838219; 15951104, 15951421, 45805897, 45807160, 45807166, 45809863, 45815183, 45815730, 45815883, 45820424, 45822187, 50994627, 50995026, 50997874, 50998016, 50998367, 50998822, 51000443, 51000595, 51000739, 51001042, 51003397, 51007851, 51008004, 51008124, 51010094, 51010282
			R - AGGGGAAAAATAAAAACATACTGAGA
1	-	G1J9	F - CTGTCATTGCCTGCATCGGGGAGAAG	RD - Msp I	86	45817340, 45819826, 45831824, 45832181, 45835243, 45838419, 45839950; 15951014, 45803494, 45804235, 45804360, 45805184, 45805335, 45805516, 45805664, 45805667, 45805668, 45805883, 45807152, 45807302, 45808160, 45808614, 45810190, 45810589, 45810747, 45810800, 45810899, 45811530, 45812771, 45814130, 45814145, 45814251, 45814541, 45814583, 45814773, 45814864, 45814880, 45815633, 45815755, 45815763,…
			R - TGTTGAGGGGAAGCAGTTTTG
1	-	E23A11	F - TACGAGAGTAGCCAGAAGTACAAAGA	TGCGE	85	45831613, 45832351, 45841952
			R - TTCACACACAAAAGAAAATAAATCTTG
2	0	E9E9	F - AGTGGACTCAACTTAAGGAACAGATT	TGCGE	86	45834604, 45836678, 45837604, 45843156, 45843368; 15950933, 45804667, 45807309, 45808469, 45816744, 50995121, 51004062, 51005429, 51007587, 51007806
			R - TATTTTAAAAGGAAACTTCCTCCAGA
2	25.8	E10C6	F - TGATAGCTCTTAAAAGAAACCAGACA	TGCGE	87	45832853, 45834305, 45841920; 50997230
			R - GTAGCTCAAAATCCATGACAGTAAGA
2	28.2	E23A7	F - GTGGATACGGCGATCTCATT	PE - GCAGAAATGATGCAGTCCAGGAACATCA (A/G)	88	45837977, 45839388, 45844664, 45845029
			R - GTGACTTCGTTGAAAGAATTTGATG
2	35.3	E11E7	F - AGAGGCTGCGCTACTTTCTCT	TGCGE	88	45831498, 45832229, 45834891, 45835031, 45835869, 45840127, 45840222, 45840833, 45843334, 45845298; 50995524, 50995935, 50996038, 50996243, 50999751, 51001892, 51004777, 51005391, 51007393
			R - GAGCCAAGTGTTGCGATCT
2	47	G1L7	F - GTGCTACAGGAAGGAATGGATG	RD - Dde I	79	15951045
			R - TAGCACAGGAACAGCCGACAATAA
2	52.2	G1E12	F - CAACCATGAGAGGAGGCCAGAGAAC	SP	90	45831331, 45843952; 15950932, 45805816, 45816928, 45816935, 51003816
			R - AAAACAGCACTACCTACAAAACCCTATT
2	52.2	E11G7	F - TATGGCAGAGGTATTGCTACTACAAC	TGCGE	88	45830553, 45831267; 45812273
			R - GTTTTCAGGTTTTCTAGGATGGATAA
2	58.3	E16G12	F - GTATTTTATGGGGAAGTGTTTGATCT	TGCGE	76	45829145; 51000106
			R - AATAAAGGGATTGAGTTGCAGTTATC
2	87.6	Cspg2	F - GACAGCAGTGGAGACAGATGAAGAAC	RD - Rsa I	92	NA; Stigson, unpublished data
			R - TCTACAGCGACGGGAGATGACG
2	92.4	E24E10	F - GTCAAAAGTAAACCTACAAAGCTTCC	PE - AGCTGCTTGATAACCTAGACTTGAAGGC (G/C)	88	45830790, 45833177; 45812180
			R - AATAACCACTTTAAGCAGAACCAAGT
2	97	G1J20	F - ATCCTCCAAGCTCACTACAACA	PE - GGAATGCCACTATTATTTTTAATGAATGCT (T/G)	90	15951009, 50997483
			R - CCAGCCCCTTCCCAAACAG
2	135.7	E11G8	F - ATAAGAAATCAAATGTGGGATGATTT	PE - CGATAACATGGACTGTATTCAACGGCAAC (G/A)	80	45830618; 45812220
			R - AATATTCACAGGGTCCACTTATTTGT
2	146.1	E14E6	F - ATTGTCTTCTTTTTGTGTCGGTACTA	PE - ATGATGTTCGATTATGTACCAATTAAAGAA (A/T)	85	45831728; 50996142
			R - TAGACAACCTCCTCACTTTTCCTATT
2	151.6	E14C5	F - AACTTTATTTCTACCCAGTTCCTTGA	SP	79	45835356; 51000738
			R - ATATTGTTGTTTACCTGGACTTCTCA
2	167.5	E7G11	F - TGAAACCAAAGGTGATTATGAAACTA	PE - CCAGCAGCAGAAGAAAGTGATCTAAGA (G/A)	90	45818722, 45819402, 45837335, 45837578, 45837584, 45837732, 45837838, 45838911, 45839339, 45839383, 45839855, 45839969, 45840051, 45840136, 45840309, 45841006, 45841122, 45841471, 45841679, 45841881, 45842988, 45843150, 45843327, 45843692, 45843894, 45844523, 45844922, 45845057, 45845153; 45803523, 45804454, 45804517, 45804685, 45805822, 45806252, 45806480, 45806944, 45813012, 45814389, 45815041,…
			R - CAGCTATGACATATAGGCAAGAATGT
2	168.6	E6C12	F - CATTGACCGTTTTGCATAAATAAA	PE - TTTGATCTGGGCACTTCACCTGC (T/A)	91	45829333, 45830946, 45835607, 45835872, 45837737, 45837896, 45838879, 45839200, 45839744, 45840042, 45841380, 45842340, 45842433, 45842857, 45843193, 45843446, 45844687, 45844802; 45804383, 45806676, 45807182, 45808681, 45809094, 45809391, 45809786, 45809910, 45809933, 45809984, 45811170, 45811216, 45811443, 45812290, 45812666, 45812869, 45813740, 45815409, 45815735, 45815736, 45816253, 45820715,…
			R - ACAGTACTGACTGAAAGACAATGGAC
2	173.1	E9G2	F - TATGAAACTATTCTTGTGGCTCTTTG	ASA	88	45818158, 45819193, 45828131, 45832290, 45835847, 45837078, 45837925, 45838842, 45839148; 45803831, 45806285, 45806390, 45806614, 45808753, 45809152, 45810406, 45813133, 45814982, 45815561, 45815685, 45822169, 50996489, 51003445, 51003844, 51004960, 51005545, 51005798, 51005921, 51005925, 51006041, 51006246, 51006606, 51006694, 51006715, 51006909, 51007284, 51007427, 51007547, 51007616, 51007937,…
			R - AGCCCTCAGACAGTACTAGTAACACA
2	226.4	E20A10	F - TGGCCAACATTTAGAATGTATAAGAA	PE - GCCACATTTTAGAATCTGCAGCCTACG (C/G)	84	45818013; 45813076, 45814196, 45815695
			R - TTGACAAATACAAAGGGTTAAGAACA
2	235.3	Slc4a5	F - TCCGCTTGCAGCAGTCTCCTTGCTCTC	SSCP	34	2198814, 28200432, 45819468
			R - TAACGGCCTGATTGATGACCAGCGAAG
2	260.3	E19A9	F - GTTTCTTCGTAGGAACATGATCAGC	TGCGE	90	45828384, 45829264, 45829957, 45830562, 45830613, 45831381, 45833309, 45833816, 45833981, 45835175, 45835193, 45835605, 45839535, 45840979, 45841482, 45841567, 45842107, 45842918, 45843192, 45843405, 45844921, 45844949; 45804141, 45804759, 45806066, 45807403, 45808263, 45809768, 45810027, 45811529, 45815779, 45815934, 45820913, 45821508, 50993740, 50993932, 50994037, 50994092, 50994227, 50994243,…
			R - GTCAACGAAATGTTACAAATAACCAC
2	264.4	E26G7	F - GTATCCAAACTTGGGACCAATATTAC	PE - CTGTGGAATGGTCCGACTCTGATTTTGA (G/A)	75	45834182
			R - CTTCAAAACGATACTGGCAATTC
2	265.7	E7C6	F - TTACCTCTCTGGAATTGACATGATAC	PE - CAGCGATGTAAGGCTTTATGTCAAGAAC (A/G)	89	45828176; 50996346, 50998063
			R - CATCTCCCCACCCAACAGT
2	293.2	E20G10	F - GAGCTCCAAACTATAACTGAAGAACC	TGCGE	91	45837262; 50994552
			R - GCTCACAAAATGCAAGATTAACTAAC
2	301.1	E10C5	F - GAAGGACTTGTTATTCAGGCATATTT	PE - TGCTAACTTCCTTCTACAGCAGAATTTTGA (C/T)	88	45832344, 45833552, 45842983; 50995358, 51001975, 51006039
			R - ACGTTTATACAAAGAACTAAACGCCT
2	301.1	E26G3	F - GAAGGACTTGTTATTCAGGCATATTT	PE - AGGTGCAAGTCTCTTGCTTTCAGTCATC (G/A)	91	45832344, 45833552, 45842983; 50995358, 51001975, 51006039
			R - CTTCTCAGAGTTCCAGCCCTC
2	310.8	E25C12	F - ATATATTGAAAACTTAATGTCGGCCT	PE - TCTAAAAACAAGTGATTTCCTATTTGGTAT (A/G)	85	45838309; 50996532
			R - ATTACTGGTTTCATTTTTCTACCACC
2	314.4	E23A12	F - GTTACCCAAGAATCTGTATACTGGAC	PE - TTGACCAAAGTCAGTTTGAAGATCTAGAAA (A/G)	89	45831474
			R - TCAACCCTATATAAAGTCGGTGTACT
2	401.8	E20A2	F - TGTTCTTTATCAGGCACAACAAAAC	PE - TTTTGGTGTGGAGGGCAGGGTATTTTT (A/T)	88	45832295, 45837027, 45837093, 45841799, 45841826; 45813570, 45820945, 51003632
			R - ACTGCATTACACAATTACAATGTCCT
2	404.1	E23E3	F - CAGTATCGAGAACTGTATTAGCAAGC	PE - TCATCCAGTTTATCATGAAGATGCCAACAC (G/A)	87	45841365; 50999563
			R - ATCTTCCTTAGAGCTAGTGCAAAGAC
2	413.8	E20A5	F - AGATTATTTTTCTTGCTGGTTCAGTT	PE - TTCAGAAGTAGGAGATTTACGAAAATAAGG (T/A)	85	45837072, 45843730, 45844819; 45805965, 45810987, 51005239, 51006563
			R - TTAAATCAGAAATAGTTGATCTCCCC
2	419.8	E15A11	F - GGAGTTACTAGAGAGGCTTGTGATTT	PE - CCAACATCTAGCTAAATGTTATGTTGGACA (G/A)	86	45829234, 45840395; 51008006
			R - CATTTTGGAGACCTTACACTAGACAA
2	453.6	E17E6	F - GACTGGAATACCTGTATGAGTACCG	PE - CGCAGCCACACATAGTGCACTCATAATA (T/C)	89	45829476, 45835064; 45806040, 50993698, 50994062, 50995572, 50995670, 50996234, 50996531, 50997315, 50997570, 50998964, 50999025, 51000074, 51000366, 51001309, 51002397, 51006311
			R - TAGTAGCTCCTTCTTAGTTCCAAAGC
2	463.3	E9E1	F - GCTTGTATATAAATGCAGCACAAAGT	TGCGE	85	45817324, 45818535; 45803624, 45805872, 45806492, 45806679, 45807637, 45807702, 45807791, 45807801, 45807858, 45807968, 45808632, 45809027, 45810855, 45814143, 45816337, 45816504, 45816742, 45816856, 45816943, 45817044, 45817155, 45817158, 45817164, 45820466, 45820827, 45821443, 45821956
			R - TACCAAGTCAAGTATAAGGCAAACAG
2	466.9	E17A10	F - AGTACAATCCTTGGTATGCTACACAT	TGCGE	91	45833594; 45821124, 45821279, 45821283
			R - AGTGAGTAGAAGCTGGGTAACTTCC
2	472.6	E25E1	F - AGGAGGACTATGACGCACTATAAGAT	PE - TCTGTGGAAAAATTGGGCAATTTAATTATT (G/T)	88	45819455
			R - CATTCTTTACTTGCTCGTATTCAAAA
2	473.7	E17E10	F - TTAGCATGAATTTAATTGTGGAACAT	TGCGE	91	45818219, 45818251, 45818915; 45805620, 45809141, 45811509, 45811755, 45812006, 45814709, 45815301, 45815553, 45816173, 45816387, 45816440, 51003574, 51005281, 51006631, 51008413
			R - ACCTTCTTTATAAAAACAACCCACAG
2	479.6	E21G10	F - GTGAACCTCAAGGATAACATCTACTG	PE - TCGCATGCCTCTCGCTCAGACA (A/C)	85	45829119, 45831317, 45832912, 45833537, 45838031; 45804453, 45804482, 45810052, 45811567, 45812846, 45813296, 45814746
			R - AAATCATCCATGCAGTGTTAATAAAG
2	487.1	E15C4	F - GATTAAACTTTTCCAGATTCTCTTGC	TGCGE	87	45834048, 45834843, 45836674; 45808382, 45812050, 45812084, 51010576
			R - GTTGTCCACAAAAAGTAGGTTCAGTA
2	498.9	E12C5	F - GTTAATGACTTGTGATTGGTTTTGTC	PE - CCTTTCACTAGACAACATTCAGATTGCAAC (A/C)	82	45833435; 50998162, 50998416
			R - GAACTGCATGAATTAAGGCTGTATAA
2	539.2	E20A9	F - TTCAATATTTGGGGACAATGTAGATA	PE - AAATATTTTATTTGACAGCAGCTTGCAACC (T/A)	86	45838894; 45810115, 45811157
			R - CAAATAACAGAACAGGTTTTCTTCAA
2	553.9	E8E9	F - AAGAGCTGCTAATTTGTGAAAATATG	PE - CTGCTAATTTGTGAAAATATGCTGGTGGGA (T/G)	89	45817756, 45819829, 45829397, 45831335, 45832384; 45808479, 51006087, 51007579, 51009493
			R - TTCTTAACCTTTAGTGCATGTTCTTG
2	558.8	E13A1	F - CATTACCAACTTGTTTCATATCCTTG	TGCGE	83	45828437; 45805837, 45807059
			R - ACCTCTTTTAACGTCTTGTGAAAAAT
2	579.1	E20G6	F - GTTTGTACATGGGTGAAGAGTAAGTC	TGCGE	92	45833187; 45805858, 45805999
			R - TTAAACAAAGTGTTTGCAAGGTAGAG
2	595.2	E23E12	F - ACAATTACTTGAAAGGCACAAAACTA	TGCGE	90	45817857
			R - GGAAAGAGAAATGGTGTTGTATGTTA
2	638.5	E19E7	F - ATTGAATTCACACGTATCCTAAAACA	PE - CTAGAACTTGTTGCATGCATTTAGCGCT (C/T)	89	45817881, 45818706, 45828568, 45837903; 15950902, 45803916, 45804142, 45804479, 45804916, 45806038, 45807788, 45808215, 45809047, 45809227, 45809513, 45809772, 45809883, 45810999, 45812256, 45813488, 45814498, 45814696, 45814697, 45815689, 45816430, 45816768, 45816790, 45817034, 45817153, 45820553, 45820769, 45820780, 45820786, 45821058, 45821170, 45821401, 45821559, 45821928
			R - GTAAATCCTTTCCCCCTTCACTTAAA
2	675.7	G2I21	F - GTACGGCGGCTGGTGACAAAAC	ASA	77	15951184
			R - CCTCCGCTGGGGGCAAACA
2	695.3	E15A2	F - TAAATCTTTCGCTAATATCTCCCAGT	PE - ATGTGAGAAATGCCCTCATTAATCCTATAT (G/A)	89	45835913; 15950824, 15950825
			R - TTCACACATTTCAATATATTCCGTCT
2	704.1	E24C11	F - CTATTTCAATCACGAGAACGAGACT	PE - GTTTATTATTATGCAATGTAATGGGAATGG (T/A)	82	45818287, 45827828, 45829663, 45832035, 45838038
			R - AAAAGTTCTAGGGTTCAAAGGCTTAT
2	720.3	E14G11	F - CTTGTTTTGTCTGTTCTTGATGATCT	TGCGE	76	45835523; 51008561
			R - CCTAATTTCTTCAGGTGATCTGTGTA
2	738.5	E9E6	F - AATCAAGAATGAATCTTTACCTCCAG	TGCGE	56	45817587, 45817832; 45805717, 45806823, 45812298
			R - TATCACTGTAACGGGATTGAATAGAG
2	-	E27E10	F - GATAGCAGAGAAAGCAGCTGACA	SP	89	45833595
			R - TAAAATGTGTTCATCCTTTTACCTTG
2	-	Kit	F - TCCGTGTGGGAATCCAGTCACT	SP	68	45819807, 45829614, 45830290; 46392792, 51003755, 51003912
			R - AGATGGCATATCTGGGACATATTC
2	-	E22E5	F - AAAGAGGAGACTTGATTGTGGAGTT	PE - AAAATGAAGTGTTTTTTGCTGAAAGTTTTT (A/T)	89	45833510
			R - GTACGAGAGTAGGGACAGAACAGACT
2	-	E23E4	F - ACAAATCATTGACGGATGTTCTTCT	PE - AGTGAGAAACAATGGATATCTGAGTTAGTT (T/A)	86	45830021
			R - ACACTTTAAGCATCATGATACAATCC
2	-	E6G5	F - GATAATCACCATTATAGGCACACAAG	PE - TGAGGTGTAACGACATCATTGCTTCTC (T/G)	85	45820176, 45836852, 45836888, 45836941, 45837660, 45838084, 45838214, 45838380, 45838528, 45839190, 45839502, 45840184, 45840407, 45841071, 45841909, 45842169, 45843477, 45844879, 45845119, 45845307; 15951527, 45803847, 45804286, 45805563, 45807081, 45808145, 45808845, 45808883, 45809310, 45809838, 45809992, 45810532, 45810579, 45811671, 45811913, 45811988, 45813506, 45815531, 45815785, 45815970,…
			R - CAAAACTCAGTTACATCAAGCAGTCT
2	-	Pdgf	F - CGGGTCATTGAGTCCATCAGCC	RD - Rsa I	39	NA; Parichy et al, 1999
			R - CAGTGGGTTTTAACATTTTCACAG
3	22	E9E3	F - ATTGGTACAATGACTCTCTCTTTGTG	TGCGE	76	45819078, 45829899, 45829970, 45833072, 45840883, 45842538, 45842798, 45843338, 45843592; 45806925, 45807137, 45809350, 45810304, 45810380, 45810398, 45813520, 51004911, 51005753, 51009203
			R - AATGCAACAAGAGATAACACTCTCAG
3	23.4	E21C8	F - ATTGGTACAATGACTCTCTCTTTGTG	PE - GACACCCCAATAAATCCAAACAGTGCATT (C/A)	81	45819078, 45829899, 45829970, 45833072, 45840883, 45842538, 45842798, 45843338, 45843592; 45806925, 45807137, 45809350, 45810304, 45810380, 45810398, 45813520, 51004911, 51005753, 51009203
			R - AATAGCATGTCAATATTTCTCAGCAG
3	33.4	E23G8	F - CCTGTATGGACATTATGAAGAGGAAT	PE - CATTGTACCTCAATGCCTTCCTAGTTCAAG (T/A)	89	45833644
			R - AGACTTGAATGCCCATGATGAC
3	50.3	E21A4	F - GAGATTTTTGTCAAAGAACAAAGTGA	PE - AGCTCTACTTTTCTAAAGACATTTCCTCAT (G/C)	86	45819906, 45840795, 45842908; 45812711, 45821789, 50998876, 51000375, 51006517, 51006956, 51007772, 51009121
			R - AGTAAAAATACTAACACGCACTTCCC
3	84.4	E13A11	F - TATACAGTTGCAGCCATAGCATAGAC	TGCGE	86	45817840, 45828850; 45808780, 45809970, 45820855
			R - TTAATTTACTGCTGTGCTCGATATTC
3	111.9	Rho	F - CCAAGAGTTCTGCCATCTACAATCCAG	ASA	60	1477471
			R - CGCAGGAGAAACCTGGCTGGAAGACAC
3	117.5	E12A3	F - GCTGGATTGAAACTTCTCTAGTCTCT	PE - TTTTCGGGGAGCTTCAAGGCTG (C/T)	87	45831269; 51005284
			R - CCACCAACTACTACAATCAAATCATC
3	126.9	E7G12	F - AAACTTTCAAAACTGTGGTGACTTTA	PE - GCTTCGATGTTCCTGCTTATTGCC (G/C)	89	45828768, 45833966, 45836300, 45837110, 45845251; 45809375, 45814881, 45815973
			R - ATTGTACATTGTTTCATTGCGATAAG
3	129.1	E10E9	F - TCACGTGATCTATTTTCTTCATTTTC	TGCGE	91	45831939, 45835770; 45807078, 51007474, 51007977, 51009327
			R - TTGACTGAATATAAAGGTGCAGTGTT
3	130.3	E19A10	F - AGACTACGTTTTGGCTGTGAAATG	TGCGE	86	45831939, 45835770; 45807078, 51007474, 51007977, 51009327
			R - GTCCTCCATTGACTGAATATAAAGGT
3	138.8	E15E6	F - AGGGCAGGACGTCTATCTTTTTAAT	PE - CACCCATGAGCCAACTTTAACCCTACA (C/A)	88	45836290, 45838344
			R - GGTTGTTTTCAGTAACTTTGTGATGA
3	157.2	E10E2	F - AAGACGAGCGAAGTCAACTGTTA	PE - TGTGCATTCCCGCGCAAGGTG (G/C)	58	45829185, 45831180, 45831306, 45832630, 45832730, 45840927, 45842657, 45844303, 45845101; 15951300, 45804037, 51006587, 51008667
			R - ACTAGCCTCTATTTGCCAACCTTT
3	164.1	E21A3	F - GTGATGAAAGTTAAGCACTCCAAATA	PE - ATGATAGCATGCAAACTGATATGGACTAAC (T/A)	87	45828248, 45829155, 45829421, 45835877; 51004849
			R - CCCAGGGTTAGAGTAGCAATAAGTAG
3	171.6	GNAT1	F - CCCATGCTGCGGAAGAGA	RD - Dra I	89	3789979
			R - TTAGAGGGCGAAAAAGTGTCATC
3	182.1	E20C5	F - ACTCACTGTAACAAATGGCTAACAAG	PE - CTACCGGTATGTCAATTGTGAATTATCACT (G/T)	83	45837856, 45838457, 45839385, 45840813, 45840878, 45841295, 45841868, 45842880, 45843774, 45844583; 45808120, 45809178, 45810840, 50995718, 51001005, 51005718, 51009911, 51010025
			R - GATATAGCACAACTGCAATAGGTCAT
3	189.9	E18C6	F - GTTTGAAATCAGGAATACCGATGA	PE - CCGAATCGTGGCTAAAGGAGAAGCT (C/A)	83	45818358, 45819476, 45828391, 45840205; 15951139, 45807795, 45816987
			R - GTTATTAGAGGCACTCTTGAAAAAGG
3	194.7	E18C7	F - GTCCTGACTAGTTCTTACCCTGAAAG	PE - CATCTTCACTTTTGGCGGGCTATGTATCT (G/C)	86	45831583, 45832870, 45838011, 45838116, 45838460, 45839998, 45840721, 45841194, 45843841, 45844022, 45844730, 45844825, 45845393; 15951628, 45805439, 45808947, 45809871, 45812353, 45812448, 45813168, 45813792, 45815570, 45821429, 45821522, 50995881, 51000270, 51003477, 51004264, 51005866, 51006399, 51006427, 51006562, 51006689, 51006784, 51007293, 51007605, 51008264, 51008507, 51008823, 51009828,…
			R - GTGTTTGCTATACTGAGTCCAAAGAA
3	197	E8C9	F - AGGATACCAACCTCTGTGCTATACAT	PE - CGTGGCGAGCGTGCCTAGT (G/C)	90	45828799; 45806377, 45806695, 45809998, 45810488, 45811055, 45811084, 45812047, 45812287, 45816676, 45821757, 45822056, 51002890
			R - TAAATGTATTTACAAACCGAAAGCAA
3	205	E28A6	F - CTCCTTGAAGGCTGTTGGAAAT	ASA	90	45830106
			R - TTCACAGTATTCCAAATATCATGGTT
3	206.1	E12E6	F - GAGAGAGATGTACACTCCCAGTATCA	PE - GGAAGCAGCACCTTGCGGATCAG (C/A)	88	45827956, 45831511, 45834819; 45806771, 51008530
			R - GTCTTACTCATATTCGCCACTAGGTC
3	217.8	E17G3	F - CTAAATCCTAACCATCACCCTACAAT	TGCGE	90	45834155; 51003205, 51008271
			R - CTAGAACTAGGCATATTGGCCTAAAC
3	223.4	E9G8	F - TGTGGTACTACGAAATCCTCTACTTG	PE - AACTCTATTTCTGTGATGAAAAATTGCTCT (A/T)	90	45819308; 15951192, 15951697, 45803855, 45811550
			R - GAAGAAGGTAGATGGAAACCTCTTG
3	235.2	E16E8	F - AAGCCATTATGTAAGGCTGTTCTACT	PE - TGTGGACCAACTAGGATTCCTCTTTTTCAA (A/T)	86	45835775; 51003753, 51008252
			R - TAAGTTGTAGCAAATATTTCAGTGCC
3	258.4	Foxa3	F - GATGGACTGCTAATCTTTTGAGACCC	RD - Mnl I	88	2073553
			R - AACAAGTGGGGCAAACAACCAACCAGC
3	262.2	E24E4	F - CGAAGAGCTGTTCCGAGAGT	TGCGE	85	45817363, 45818178, 45818385, 45818730, 45828032, 45830710, 45831755, 45834740, 45843989; 15951530, 45809617, 45811995, 50993516, 50996904, 50997022, 51001733, 51007805, 51007992, 51008746
			R - AGAATCCCATGCTTCAATGC
3	262.2	E8A9	F - GATGTAATATTGTGTCAACTCGAACC	TGCGE	84	45817573, 45818869, 45818948, 45830063, 45830218, 45838204, 45838408, 45838451, 45838493, 45839000, 45839308, 45841049, 45842037, 45842729, 45842926, 45843054, 45843210, 45843426, 45843559, 45843665, 45843825, 45843953, 45844505, 45845389; 15950992, 15951117, 15951153, 15951225, 45803569, 45803718, 45803745, 45803973, 45804122, 45804249, 45804744, 45805023, 45805041, 45805047, 45805080, 45805134,…
			R - ATTGGTCCATTAATAAAAGGAATGAG
3	264.6	E23C10	F - CCAACTACAGCAGGAGGTCTG	PE - CCCATCCTCCATCGCCAGAAGTCT (A/C)	86	45835870; 45815534
			R - CAGTCAGTGAGGGAGTGCTTATATC
3	265.9	E18G2	F - GATGTAATATTGTGTCAACTCGAACC	PE - GCGCCAATTGACAGCTCAGAATACCA (A/C)	84	45817573, 45818869, 45818948, 45830063, 45830218, 45838204, 45838408, 45838451, 45838493, 45839000, 45839308, 45841049, 45842037, 45842729, 45842926, 45843054, 45843210, 45843426, 45843559, 45843665, 45843825, 45843953, 45844505, 45845389; 15950992, 15951117, 15951153, 15951225, 45803569, 45803718, 45803745, 45803973, 45804122, 45804249, 45804744, 45805023, 45805041, 45805047, 45805080, 45805134,…
			R - AATGCACAAATAAAACCAGTTCATAA
3	267.1	E14C12	F - GATCCATGTTAGCAATATGATGAAAC	TGCGE	90	45829371, 45833587, 45842955; 51007615, 51010800
			R - TACAAAAATACAAAGGCAAGTGTAGG
3	269.4	E16G10	F - TTTTATACAGAAGCTGTGAAAATTGG	PE - TGCTGCAGCCACACACCAAAGG (C/G)	87	45829371, 45833587, 45842955; 51007615, 51010800
			R - GGTTTAACACAAAAGTACTCGACAGA
3	275.6	E29A6	F - AGGAAGTGTCACCTTTGACCTATTTA	ASA	90	45836394, 45838115, 45843696; 51003977
			R - TAGAGCAGTAAGGTAGGATGGGTAAG
3	275.6	E6E2	F - GGTTACAGATGACAATGTTTGCTTAG	ASA	88	45836394, 45838115, 45843696; 51003977
			R - TAGAGCAGTAAGGTAGGATGGGTAAG
3	275.6	E15G5	F - TAAACAGGAATGTACAAGGCACTAAC	PE - CTTTGATCTCCAGTCAGAAGCAATCTTTTA (T/G)	88	45832784; 45816076, 50996705, 51008832, 51009394
			R - GATCCTTCTTCATAGAATGTCAACAA
3	275.6	E25C2	F - GAGAAGGACTTAATGCAACTGTTTTT	PE - TTGCAGGCTACTTTGTGATAATAGGAATCG (G/A)	86	45833830; 51004903
			R - GATACAGAAGAGTGAAGAATGGGAG
3	275.6	E9G12	F - TACTTCAAGGACAAGAGTGGTATTTG	TGCGE	88	45836094, 45836630, 45838430, 45839027, 45841170, 45842549, 45844640; 45813608, 50994045, 50998767
			R - GCAGGTGGATATCCTAATAAAAGAAC
3	280.2	E10G4	F - CTATGATTATAGATGATGGCGTTGTG	PE - CACTTTACACAGCCCTTCCACCACTT (A/C)	87	45831451, 45831800, 45833782, 45837278, 45837549, 45840814, 45841903, 45844168; 45803943, 45805473, 45805898, 45806941, 45806964, 45809752, 45811328, 45813022, 45814397, 45814688, 45814928, 45815048, 45816096, 50999633, 51003558, 51004706, 51005074, 51005360, 51006683, 51008411, 51010809
			R - TTAGTGTCAATAGAAGGTTGTTCTGC
3	280.2	E12A8	F - GCACAAGAAGGAATGAAATTCTTTAG	PE - CCGTCCAGGGAAGAACAAATTGCTCA (C/A)	88	45835890, 45838221, 45838259, 45838305, 45838549, 45838691, 45838861, 45838923, 45839571, 45840124, 45840167, 45840673, 45840928, 45841706, 45842488, 45842674, 45842740, 45843119, 45843268, 45843778, 45843846, 45844147, 45844255, 45844302, 45844374, 45844579, 45845305, 45845493; 15951195, 45803825, 45805638, 45805737, 45805770, 45807498, 45808064, 45810511, 45810551, 45810806, 45811584, 45811909,…
			R - AAAATTGAAGTAGTGAAGGACAGACC
3	280.2	E6G4	F - TCAGAAGATTTTTGTGACCTTGTC	PE - TGGCCCTATGCCTCCACCATC (T/G)	89	45834287, 45837779, 45837817, 45839080, 45839745, 45841556, 45845211; 45803472, 45807554, 45811434, 45811701, 50993629, 50993683, 50993718, 50993781, 50993984, 50994646, 50994655, 50995286, 50996491, 50997169, 50997646, 50998584, 50999361, 50999445, 50999447, 50999606, 50999685, 50999892, 51000180, 51000450, 51000751, 51001032, 51001136, 51001256, 51001360, 51001697, 51001841, 51001899, 51001922,…
			R - TCTCATAGTAATCTTCGGCACTGTAG
3	280.2	Calm3	F - CCTCTTGTCCCAGTGCCAGTG	RD - HinF I	90	45835890, 45838221, 45838259, 45838305, 45838549, 45838691, 45838861, 45838923, 45839571, 45840124, 45840167, 45840673, 45840928, 45841706, 45842488, 45842674, 45842740, 45843119, 45843268, 45843778, 45843846, 45844147, 45844255, 45844302, 45844374, 45844579, 45845305, 45845493; 15951195, 45803825, 45805638, 45805737, 45805770, 45807498, 45808064, 45810511, 45810551, 45810806, 45811584, 45811909,…
			R - TCCAGGGATCCGAAACAAAG
3	281.4	E19A4	F - GGACAAATACTTAAGGAGAAGCAAAG	PE - GAAAGGAAACTACACCACAACAGGCAAC (T/G)	88	45835890, 45838221, 45838259, 45838305, 45838549, 45838691, 45838861, 45838923, 45839571, 45840124, 45840167, 45840673, 45840928, 45841706, 45842488, 45842674, 45842740, 45843119, 45843268, 45843778, 45843846, 45844147, 45844255, 45844302, 45844374, 45844579, 45845305, 45845493; 15951195, 45803825, 45805638, 45805737, 45805770, 45807498, 45808064, 45810511, 45810551, 45810806, 45811584, 45811909,…
			R - ATCATACAGGGTATACAAACACCTCA
3	293.6	E21A5	F - CCATACAGTTTGGAAACTACAAGAAA	PE - CCTTCCCGTCTCAAGTGTATGTGCAC (G/A)	87	45830338, 45831820, 45832909, 45833779, 45839604, 45839984, 45840581, 45841077, 45842702, 45843231; 15951123, 15951591, 45809554, 51004114, 51004834, 51004982, 51005786, 51007425, 51010273
			R - AATACATCCTAATTCTGTTTGGAAGC
3	293.6	E17E9	F - ATACTGCAATGTAACAGGAAAATCTG	TGCGE	90	45830338, 45831820, 45832909, 45833779, 45839604, 45839984, 45840581, 45841077, 45842702, 45843231; 15951123, 15951591, 45809554, 51004114, 51004834, 51004982, 51005786, 51007425, 51010273
			R - CGATAAAATGAGTACCATTAAGTTGG
3	294.7	E13G5	F - CGCATCATTTTTATGATATCTGAACT	PE - CATCATTCATGCTCGCTCCATCACAC (T/C)	83	45829408; 45813569, 45814326, 51000453
			R - CACGTGAAATGGATTAAGTCTAAGAA
3	294.7	E7A8	F - ACCTACCTTGGATTGTTACATGTTTT	PE - CCTTTCTTTCTTGAAATGCAGAATGTTTAA (C/T)	87	45833578; 51010137
			R - GTCACCTTCAGCAAACCCTTAG
3	294.7	E9G11	F - AGCCTAATGAACTCTTGGATATGTTT	TGCGE	78	45817398, 45841087, 45841361, 45841545; 45803404, 45807640, 50996206, 50997326, 51001513, 51003790, 51005525, 51006089, 51006561, 51009355
			R - TAGTACACAAGTAAAGTATGCTGCCC
3	311.8	E6C5b	F - CCGTAAATGTTTCTAAATGACAGTTG	PE - GATTGAAAACTGGAACCGAAAGAAGATAAA (A/G)	90	45818079, 45818141, 45818237, 45818288, 45818651, 45819031, 45819107, 45836785, 45836797, 45836900, 45836913, 45836926, 45836929, 45836965, 45836974, 45836992, 45837011, 45837013, 45837084, 45837121, 45837140, 45837270, 45837288, 45837370, 45837385, 45837403, 45837545, 45837546, 45837634, 45837646, 45837748, 45837849, 45837863, 45837906, 45837933, 45837984, 45838004, 45838128, 45838146, 45838175,…
			R - GGAAAGAAAGTACAATCAAGTCCTTC
3	311.8	E7G7	F - AGAAAAACTGGAAGACCAGAGTATGT	PE - TGCAATGCAATAGAGGACTTGATTGTACT (C/G)	88	45818271, 45818288, 45818581, 45818651, 45819031, 45836785, 45836797, 45836900, 45836913, 45836926, 45836929, 45836965, 45836974, 45836992, 45837011, 45837013, 45837084, 45837103, 45837121, 45837140, 45837270, 45837274, 45837288, 45837315, 45837353, 45837370, 45837385, 45837403, 45837411, 45837453, 45837545, 45837546, 45837634, 45837646, 45837748, 45837849, 45837906, 45837933, 45837984, 45838004,…
			R - TAAGGCAGAAAATACAAAAACACTTG
3	315.3	E18G5	F - CCGTAAATGTTTCTAAATGACAGTTG	PE - GATTGAAAACTGGAACCGAAAGAAGATAAA (A/G)	85	45818079, 45818141, 45818237, 45818288, 45818651, 45819031, 45819107, 45832212, 45836785, 45836797, 45836900, 45836913, 45836926, 45836929, 45836965, 45836974, 45836992, 45837011, 45837084, 45837121, 45837140, 45837288, 45837370, 45837385, 45837403, 45837545, 45837634, 45837646, 45837748, 45837849, 45837863, 45837933, 45837984, 45838004, 45838128, 45838175, 45838192, 45838215, 45838277, 45838280,…
			R - GGAAAGAAAGTACAATCAAGTCCTTC
3	321.4	E18C8	F - TCAACAAATTAAACTCCACTCTGAAC	PE - AACCTATTTAGAAGGTCTTATTTTTAAACC (T/A)	88	45818108, 45818951, 45819112, 45832532, 45832719, 45837614, 45838135, 45843488, 45843612; 45805421, 45806588, 45807030, 45808195, 45809763, 45810722, 45811948, 45812690, 45814092, 45816243, 45816383, 50994347, 50994768, 50996122, 50997838, 51002441, 51002843, 51005772, 51007033, 51007381, 51007651, 51009983, 51010540
			R - GATAATAGAATGCTCAATGACTGCAT
3	322.6	E7G2	F - ACTATTTTATACCGTACCAGGTCCAC	PE - GGGAAGGCACACAGTGATTTCGA (T/C)	86	45830089, 45831549; 45803379, 45804111, 45804259, 45805957, 45806817, 45807343, 45807951, 45808268, 45811723, 45812073, 45812808, 45812975, 45813447, 45814133, 45814260, 45814263
			R - TTTTATTTGCCTTCTTCCAGTCAC
3	333.2	ctg325	F - GTGAAGTCAGTGATGAAAGTCCATGT	RD - Alu I	91	50996269, 51000228
			R - CTAGGATACCAGTGGGAGAGTGTAAT
3	343.2	E18E7	F - CATAGTATTCTTGGAGGTTGTCCAG	PE - TTGCAAGGCATTGACCTCCGAGA (G/A)	87	45817305, 45817326, 45817353, 45817357, 45817368, 45817370, 45817393, 45817394, 45817395, 45817403, 45817406, 45817407, 45817420, 45817428, 45817431, 45817433, 45817471, 45817472, 45817474, 45817477, 45817491, 45817505, 45817509, 45817515, 45817532, 45817560, 45817578, 45817583, 45817589, 45817591, 45817599, 45817637, 45817644, 45817651, 45817654, 45817662, 45817663, 45817664, 45817680, 45817688,…
			R - GACGACTTCGCTATAATTTAACAACA
3	343.2	E5E4	F - AGACCGAATTTACATGGCATAAG	PE - CGAGGGGGCGTGCATAGCAA (T/C)	86	45817305, 45817320, 45817326, 45817331, 45817357, 45817370, 45817374, 45817393, 45817394, 45817395, 45817403, 45817406, 45817407, 45817420, 45817431, 45817433, 45817471, 45817472, 45817477, 45817491, 45817502, 45817515, 45817532, 45817549, 45817556, 45817560, 45817578, 45817583, 45817589, 45817591, 45817599, 45817634, 45817637, 45817649, 45817651, 45817654, 45817661, 45817663, 45817680, 45817692,…
			R - TTTTCACGTCAGTTGTCAGTTTATTT
3	343.2	E5E6	F - CTTCTTAATCATCATATCCTGGCAGT	PE - TATTTGCTAATCAAACAACGCATCACTGT (A/C)	91	45817303, 45817309, 45817311, 45817333, 45817334, 45817344, 45817354, 45817359, 45817382, 45817390, 45817415, 45817422, 45817430, 45817442, 45817446, 45817447, 45817458, 45817476, 45817492, 45817524, 45817546, 45817550, 45817580, 45817584, 45817588, 45817618, 45817639, 45817645, 45817660, 45817681, 45817682, 45817685, 45817710, 45817712, 45817723, 45817724, 45817735, 45817737, 45817776, 45817788,…
			R - TGTCTAGGTATGACGTTGTTTTTCTC
3	413.2	E10G12	F - GCAATCTGTGACTGACCATGAG	PE - GGTTGATAACTTTGTTGTGAGAGCGTGG (C/A)	86	45835518; 51009613
			R - GTTGAAGTCAGGCATTGTTAATAGAA
3	413.2	E7C10	F - ATTCTAATTCTCATTTTTGCTGAGGT	PE - GTAAGGGTGTAACCAACATGCAAGAAAT (T/G)	87	45818212, 45818672, 45818855, 45820131, 45820144, 45828215, 45833590, 45836616, 45843519; 45804897, 45805111, 45805132, 45806332, 45806740, 45809544, 45812314, 45814353, 45816858, 45816908, 45820486, 45821114, 45821217, 50993985, 51001027, 51004213, 51005951, 51006143, 51007760, 51008396
			R - AGTACACACAGACATGGTCACTAACA
3	420.7	E6C2	F - GTCTAATCAGCTCCGAAACAATAAAT	PE - CAACTCCCATCCCTACCTCTTACCTC (C/T)	81	45829880, 45830227, 45831024, 45841151; 45806423, 45820988, 50993493, 50995560, 50997116, 50998667, 50999855, 51001768, 51005762, 51007540, 51008080
			R - GCAATACGTACTGTGACAAAAGAAAT
3	427	E16G1	F - ACATAGGTTTAAAATGTGAACAGTGC	TGCGE	90	45831890, 45832631, 45834236, 45845105; 51007962
			R - GTCGTCAAATACAAAGCAAACAGTAT
3	431.7	E19G10	F - AGTTTGTTTTGGACCTTTAACTTGAT	PE - AAGTATTTACAGTTCAGTACAAAATGACTT (T/G)	86	45819458; 15950905, 15950920, 45803951, 45810594, 45810947, 45812022, 45812352, 45812573, 45812925, 45813558, 45813896, 45816133
			R - TGCAGAGTAACATTATCTAATACGCA
3	438.9	E7C8	F - GGTGAAAATAAGCTACAGAAACTTCC	PE - TTCTCCTGTTTGGAAACGGACTCAAA (A/G)	89	45836708; 51008066
			R - GAAAGTAGGCACAGTTCTTGACATAA
3	445.7	E17G8	F - CTATTTGTCAGAGGTCTGTAACCTGA	TGCGE	91	45830237, 45834767, 45836142, 45837745, 45840118, 45844660; 45804570, 45804706, 51003362, 51003773, 51007291, 51008610, 51008805
			R - GTTTGGGATCTAGAATGCCTAATTT
3	450.1	E10A8	F - TGGTGGATGTCACTAAGAGCTACTAC	PE - TTCCTCCCCCTAACACAGATTTAAAGCTC (C/T)	90	45832278, 45842715; 15951084, 45810314
			R - ACATCTGTCAGGAGATGTGCAG
3	455.3	E22G5	F - TAGACAGTGCATACTTGAAGATGTTG	PE - GATGTGTGCGCCACATGCAAAGG (G/C)	59	45831082, 45836400
			R - TGGTCAATGAAAATATGTACTGAAAAA
3	455.3	E25G1	F - CTAGCCAGTGCAACTTTGATCC	PE - CCGGCAGAGCGGTCAGAAGGA (C/A)	58	45831082, 45836400
			R - GACCTTCAGTTAGGTTTGGTTACTTC
3	527.9	E18G10	F - TCAGCAGCAGCTATCACTGAG	PE - ACCACGTGACCTGCTCCCGAA (T/C)	84	45819608, 45819971, 45820190, 45828932, 45829096, 45829256, 45829489, 45829725, 45830150, 45831072, 45831866, 45832965, 45834168, 45834753, 45834915, 45836062; 45803548, 45803734, 45803819, 45803897, 45803900, 45803927, 45803957, 45804016, 45804081, 45804125, 45804140, 45804187, 45804208, 45804341, 45804418, 45804520, 45804529, 45804545, 45804638, 45804669, 45804756, 45804769, 45804793, 45804862,…
			R - CTTCATGTGTTTCAGGAGGTTAAGTA
3	531.7	E10A12	F - ACATGCCACAGCTGTTAACCT	PE - GAACTTGTCCAGCGAGCAGTGCA (T/C)	87	45817640, 45817646, 45817647, 45817678, 45817714, 45817738, 45817746, 45817759, 45817814, 45817895, 45817919, 45817960, 45818028, 45818055, 45818072, 45818075, 45818099, 45818260, 45818261, 45818303, 45818411, 45818434, 45818579, 45818877, 45818883, 45818906, 45818913, 45818943, 45818968, 45819019, 45819025, 45819047, 45819122, 45819156, 45819192, 45819240, 45819243, 45819267, 45819271, 45819272,…
			R - ATTTCGAAAAGGTGTCAATTCAAGT
3	531.7	E18A3	F - CTTTTAACGGTACTTGCTGGTCA	PE - GAACTTGTCCAGCGAGCAGTGCA (T/C)	48	45817640, 45817646, 45817647, 45817678, 45817714, 45817738, 45817746, 45817759, 45817814, 45817895, 45817919, 45817960, 45818028, 45818055, 45818072, 45818075, 45818099, 45818260, 45818261, 45818303, 45818411, 45818434, 45818579, 45818877, 45818883, 45818906, 45818913, 45818943, 45818968, 45819019, 45819025, 45819047, 45819122, 45819156, 45819192, 45819240, 45819243, 45819267, 45819271, 45819272,…
			R - AGCCTGTAACCAAGACCTACTTTG
3	546.7	E15E2	F - AATGCCTGCTTAAAGCTAGAACTTAG	TGCGE	91	45831459; 50999402
			R - CTTTAGACTCCTCCTTTAGCCTGTAA
3	557.3	HLP1	F - AGAATGGCAAGGGCAAAAAGGTAG	RD - BsuR I	91	45819475; 15950836, 45809602, 45813954, 45817287, 45817289, 50993710, 50994687, 50996889, 50996899, 50997229, 50997547, 50998434, 50999396, 50999608, 50999978, 51002705, 51002956, 51003136, 51005585, 51008820, 51008903, 51009089, 51009691, 51009865
			R - AAGCTCAGGGCAGTCCAAGTTCTC
3	564.9	Hoxa4	F - CTGCAGCACTGGCAGGTCCTGCTG	SP	40	746417
			R - TGGCGAGCGCATCTTGGTGTTGG
3	564.9	Hoxa9	F - AGGCACTACGGCATCAAGCC	SSCP	40	687783
			R - ACTCCTTAGGCCGGTCCTTGT
3	589.5	E6C8	F - CAAGTAGCTAAATCCTACATCAAGCA	TGCGE	86	45833050; 50998593
			R - TAATTGGAAATTGCAGTCTGAGTTAG
3	643	E17E8	F - GTAGTCATTGATAGCTGTGCCTGTAT	TGCGE	91	45828759, 45834964; 51006604
			R - GAATACTGAAATCTGTAGCAGTCCAA
3	646.5	E19G3	F - GAGTTAAACCTTGGTTGTGTGTCTAA	PE - AGTTCATTGGCATGTTGTCTGAGTGCT (C/T)	88	45832234, 45836042; 45806021, 45813161, 50996885, 51001636
			R - GCGTAATGCAGTAACAGAATACATTT
3	646.5	E20E2	F - AACTCTTCAGAGAGAGCCTACACAAC	PE - GCCTTGAGAGTGACATCCGGCAAT (C/G)	86	45837024, 45842401; 45811085
			R - AGATATGACCAGAAGCACATATTGAA
3	646.5	E13E5	F - CTTGTGCTCTTGAGAATAAATCACAT	TGCGE	84	45836098
			R - AATTAGAAGGAAGAGGAACAAAAACA
3	647.7	E12C2	F - ACGTTTTTGAGTTGAACTTTCTTTTT	PE - GGTCTTTTCCCAAGGAGACCTTAAGATGG (G/C)	86	45817963, 45830555, 45834645, 45838454, 45839558; 15951008, 50994709, 50995410, 50995988, 50998130, 50999056, 51000309, 51002133, 51004152, 51007668
			R - ATTTTTCCATTTTAAGATTTGGTCAG
3	661.4	betaTH	F - CCCGGAAAGCAAAACCTT	RD - Xcm I	92	33413869, 34014909
			R - TATCATCCAGGTTAAATGAC
3	-	E7E5	F - GACCTTAGGTGAAGACTACACTTGC	PE - CCTGGGAGAAGTTCATGCGCC (T/A)	86	45819608, 45819971, 45820190, 45828932, 45829096, 45829256, 45829489, 45829725, 45830150, 45831072, 45831866, 45832965, 45834168, 45834753, 45834915, 45836062; 45803548, 45803734, 45803819, 45803897, 45803900, 45803927, 45803957, 45804016, 45804081, 45804125, 45804140, 45804187, 45804208, 45804341, 45804418, 45804520, 45804529, 45804545, 45804638, 45804669, 45804756, 45804769, 45804793, 45804862,…
			R - CTTCATGTGTTTCAGGAGGTTAAGTA
3	-	E6E1	F - GAAGCTTGAAGGTCTAGTCACTTTCT	TGCGE	81	45829946, 45830543, 45830650, 45831488, 45833871, 45835128, 45837096, 45840189, 45841381; 45814914, 50996212, 50996472, 50998263, 51001130, 51001245, 51002122, 51006481, 51007635
			R - ATTCAATTAGCCAGTTTCAAATAACC
4	0	E9A2	F - GCTGCTCTGGTACCGCTAAG	TGCGE	75	45819588, 45831174; 51005620
			R - TACAGTTAAAGGCATACTATGGGGAT
4	1.2	E8A1	F - AGAGGCGGCTATGATCGTG	PE - CTACGCGCAGCAGTCAAGAGG (G/A)	89	45819889, 45827822, 45833010, 45836982, 45839278, 45840079, 45841784; 45806579, 45815445, 50993466, 50993574, 50994636, 50996428, 50996651, 50996818, 50997200, 50998832, 50999041, 50999096, 50999440, 50999770, 51000053, 51000858, 51001103, 51001121, 51001171, 51001306, 51001628, 51002240, 51002755, 51005002, 51005719
			R - GGCTAGTCAATACAATAAAAACAGCA
4	6.9	E5A8	F - ATATTCAAGAATAGGAACCTGCACTC	PE - TGAGCTACAGATCATCATGTCGAAGATGTT (G/A)	90	71119460
			R - GTTGCTGTGATAGACAATGAAGATGAT
4	12.7	E25E3	F - GGTTCTGATAGAGCTGAAAAGTCTG	PE - ACTACACCATTCCCCCATTGACCATTG (A/C)	87	45831822, 45841834
			R - TAAGTAGGTAAATCGTGATACAGGGG
4	16.2	E23A1	F - CACACCCATTTCTGAGGTCTAC	PE - TCAGGAAACATTTGGAATGCAGTCCCC (T/G)	89	45829139, 45829496, 45829998, 45830226, 45833561, 45837250, 45839315, 45844089
			R - TCACACAGCAGGCTTGTTTTT
4	65.3	E24A11	F - GGAGTAAGATCCAGCAAGAGATAGAA	TGCGE	90	45831468, 45833851, 45836402; 51002487
			R - ATCTTGTTCAATAGGCTTAGACTTGG
4	71.1	E14C8	F - CTTGTTAAATATTGTGGGCTGTTATG	PE - CCACCCACAGTGAGCAGCCCA (T/A)	84	45830616; 45812509, 51005624
			R - AACCAACAAAAGAAAAGAAAATTCAC
4	71.1	E19G2	F - TGGAATACATTTTCTTTCAGCATATC	PE - CCACAAACGAAGACCAACACCTGTG (T/C)	86	45827833, 45831703, 45832578, 45834125, 45835861, 45845371; 45804307, 45804608, 45804777, 45806340, 45808322, 45808578, 45809030, 45812780, 45813482, 45816067, 45822039, 51009390
			R - CCATTTAAGTGCAGGGTGAATAAG
4	76.1	E13E7	F - GATTGTTAAGGACCTACAACCAATTT	PE - GCAACTGAGAAACCTAGCACAGTCTTTGAT (C/T)	85	45828201, 45835121; 51005700
			R - AGAAGCCACCTTTTAAAACCATAACT
4	77.3	E6C7	F - CACAGTTTGTCATATTCCTGAGAGTT	PE - TCTGGGGTGGTGTGGCCTATTG (C/A)	90	45831067; 50993472, 51005332
			R - AGTCATTGTCTCAATTTACAAGATCG
4	119.1	E20C1	F - CTAATCAACTTCATCAAGCAGCAC	PE - GCAGCCAGATCAATGTTGTAGTTGCAGA (G/T)	84	45817605; 45804101, 45814534, 45815822, 50999069
			R - GTTGATGTTTAATTGTGCGAATTTAG
4	188.1	E14A11	F - AGTCAAAGAAGTGGTTTAATGCTTTT	PE - CTAACAAGGATCAAAGGATAACATTGCAAC (A/T)	85	45828948, 45831929, 45832042, 45838547; 51009587
			R - CAAACTCTTTAGGCAGTGTTTTTGTA
4	188.1	E19A2	F - AGTACCTGTTCGACAAGCACAC	PE - TCTGCAGGAGGGGGCTCTGCT (G/A)	86	45817434, 45818189, 45818923, 45819108, 45819816, 45820152, 45828890, 45830354, 45832316, 45832414, 45832614, 45832618, 45833602, 45837662, 45837770, 45840803, 45841676, 45842837, 45843397; 15951239, 15951325, 15951406, 15951446, 15951562, 15951646, 45803613, 45803699, 45803705, 45804055, 45804075, 45804236, 45804544, 45804758, 45804841, 45804850, 45804899, 45805085, 45805088, 45805126, 45805298,…
			R - CAGCACTGAAAACCTTTATTTTTCTT
4	190.5	E8C8	F - GTACCTCTTCGACAGGCTGACT	SP	89	45819647, 45819671, 45819799, 45819806, 45819827, 45830669, 45832867; 45803578, 45803671, 45804027, 45804073, 45804136, 45805158, 45805191, 45805202, 45805253, 45805268, 45805316, 45805564, 45806112, 45806166, 45806426, 45810330, 45810910, 45812146, 45821563
			R - GAACGTTAAAGTTTTATTAAGGCAGG
4	196.8	E25A8	F - GAGAGGAGTTCCTGTACCATGC	TGCGE	82	45819010, 45828070
			R - TTTACAACGGTCTTCCTCCACT
4	204.3	E24A12	F - TACTACTGTCCTCACAACACATGAAC	TGCGE	88	45834921; 51007919
			R - AAACAGCTGCAGATATGTTAAACAAG
4	211.7	E14A7	F - GTACTTTGAATGTCTCATTCCTTTGA	PE - TGTTTGTACCCTCTTCATTGCCATCAATTC (A/T)	85	45836259, 45836794; 45814721, 51003917
			R - TCACTAATGATGCATAACAAAACTGA
4	223.7	CoxV1b	F - CCTAGAACATTACCAAAACAGACTCA	RD - Bcl I	91	45817461, 45818068, 45819246, 45819268, 45819454; 45803666, 45807042, 45809197, 45812919, 45813989, 45814354, 45817074
			R - AATGAAGAAGTATTGCATGTGAGAAC
4	224.8	E12C7	F - AGACATTCCTTTAAGAGATTACTCGG	PE - CTATAAATATGGGTTTGGCGAAAGGGCG (C/T)	88	45835264; 50994583
			R - CCCTTTGTAAAATAATTCCAAGAAAA
4	229.6	E10G3	F - CAGAAGCTTTTCATAATCCTAGAACC	TGCGE	86	45818045, 45818456, 45827813; 45805571, 45811403, 45817203
			R - TAAATCTAGGAATAGTGGTGTTGCTG
4	233.2	E18A4	F - GTTTTTGTAATTTCATGCATCTGAAG	PE - CTGAGCCTCGTTCCCCTCCCAA (A/G)	88	45838106, 45838153, 45845443; 15951190, 15951328, 50993515, 50993673, 50996803, 50998102, 50998238, 50998703, 51000797, 51001248, 51001311, 51002459, 51002474, 51003066, 51003223
			R - TTCCATCTACCAGAGTTACGTGG
4	235.5	ETG93	F - GAATAAAAGCAACAATTGCAGAGTTA	PE - TTCTTCCCACGATCATCTCGCTC (T/A)	90	51000977, 51010876
			R - CTCGACTCCTTCGATCTCTACTC
4	242.5	E13E2	F - GCATTTTGAGCAGTTATTGTTTTAGT	TGCGE	87	45832370; 45813655, 51001505
			R - ACTTAAAATCCCAAGTTCAGAAGCTA
4	243.7	E12E12	F - AATTGTTTAGTCTTGGTATGTTGTGC	PE - GCACAGGTGGTTTGAATAAATGGGTATCTG (C/T)	88	45832050, 45835004; 50999465, 51001828
			R - AACAAATGATCCTACTCATGTTTCAA
4	243.7	E8E1	F - AACACAAGGAAAAATGAAGAGTCCTA	PE - AACATTACAACATGATGGTTCTGGCAACC (T/A)	88	45835253; 45807639, 45809274, 45820290, 51000098, 51001017
			R - TTCAGAAAGTCCAACGTTTATTAGTG
4	250.6	E14G10	F - TGGATTAGAATAAGAGCATTCAACTG	TGCGE	91	45835372, 45836112; 45820994, 50998348
			R - ACTTTCACAACAACTAATTTGCTGAC
4	267.7	E16G9	F - CATCATGGGCATATTTTACTACAAAC	TGCGE	91	45817691; 15951185, 45810332, 45813384, 45817292, 45817301, 45821495
			R - AACTTTATTCGCTGAAACAGTCAG
4	287.8	E16A7	F - GTAGGTGCTTGTATGTATTCTGCACT	TGCGE	89	45830930, 45832685, 45843443; 45804361
			R - TAACATTTGTGTGTCTTGACTTTGAA
4	295.9	E23E9	F - GTGTGATGACCCTCCCTTCTATT	PE - AGATTGGGATTCAGTCTTTTTCCCCCC (G/A)	90	45844503; 15950866, 15951241, 45806133, 45808627, 45810210, 45811894, 45812302, 45814520, 51003818, 51004200, 51009666, 55724917
			R - GACATTTTATCCAAAATCAGGTTAGC
4	301.8	E6E5	F - CCTTCAGACGAAAACAGCACTAAG	PE - TGCACAGTCTGTGGCACAGAAC (G/A)	88	45817571, 45817623, 45818506, 45819114, 45819139, 45820050, 45828239, 45829122, 45836633; 45803774, 45805963, 45806036, 45806236, 45806552, 45806789, 45806842, 45806952, 45807139, 45807173, 45808555, 45808654, 45808898, 45809065, 45809347, 45811813, 45812147, 45812779, 45813822, 45816034, 45816497, 45821414, 45821473, 45821858
			R - TACAGTGTATGAGAGCCCAATATTTC
4	301.8	E8A10	F - AAAGTTTTCTTTTTAAGTTGCCAAAA	PE - GTTGGGCATGGAAAAATCCTTTGGG (T/G)	86	45828332, 45833119, 45833335, 45837564, 45838237, 45840321, 45844351; 45809354, 45809452, 45811137, 45815954, 50995559, 50996030, 50996548, 50996974, 50998300, 50998394, 50998490, 50998928, 51000357, 51000423, 51001073, 51002703, 51003105, 51004541, 51004618, 51006949, 51008092, 51010481
			R - CATAATTTCTACATGATTTATGCGCT
4	306.6	E26G10	F - AAGTTGATTTTAACGAGTTCCTGGT	PE - GCTGGCAGTGTTGCTGGTTCCG (C/G)	88	45841282, 45842752; 45804084, 45804154, 45804399, 45804818, 45804903, 45805628, 45806178, 45809820, 45810753, 45810824, 45811476, 45812942, 45820202
			R - TTCTAGGTCTGGCTCTGTTTCTATTT
4	312.4	E23G7	F - GACAATATGATAAAGACAGTGATGGC	TGCGE	90	45835327
			R - ACAAGTGATACACAAAATGTGGAAAT
4	330.5	E9A3	F - ATCACAAATATGGAGGATTATAGGGA	TGCGE	83	45831483, 45836453, 45838591, 45841839; 45811408, 50993410, 50993606, 50993647, 50994096, 50994107, 50994147, 50994416, 50994457, 50994729, 50994812, 50995371, 50995608, 50995798, 50995825, 50996365, 50996420, 50996807, 50997395, 50997576, 50997638, 50998105, 50998157, 50998480, 50998640, 50998853, 50999315, 50999354, 50999601, 51000311, 51000534, 51000752, 51000948, 51002256, 51002433, 51002992,…
			R - CTCATCTTCAGAGTCTCCTGGTG
4	336.6	E7C5	F - CTGATAGTTGTAGGTAATCTGGTTGC	PE - GCTAAAAAAGTAAAGGCCTTGCTGTGC (G/T)	90	45834966, 45835835, 45839982; 45810644, 45811006, 51006322
			R - ACATTGATCTCTAGGAACACATTCTG
4	345.4	E12E11	F - TTGCAAGTCTTGAACACTAACTTTTT	TGCGE	81	45830576, 45844352; 45805567, 51002812
			R - CAAATATAAAAATGGCATATGGACAC
4	362.3	E11G6	F - ATGATGATTGAACAAACAGACACTTT	TGCGE	88	45831483, 45835868, 45836453, 45838591, 45841839; 45811408, 50993410, 50993606, 50993647, 50994096, 50994107, 50994147, 50994416, 50994457, 50994729, 50994812, 50995371, 50995608, 50995798, 50995825, 50996365, 50996420, 50996807, 50997395, 50997576, 50997638, 50998105, 50998157, 50998480, 50998640, 50998853, 50999315, 50999354, 50999601, 51000311, 51000534, 51000752, 51000948, 51002256, 51002433,…
			R - AAGCAATTAAAACAGTAAAGAAGGGA
4	392.9	bl005ba01	F - GACAGGTCATGAACTTTTGAAAATAA	RD - Hpa II	91	50994926
			R - AAAGTATATGTACCAAATGGGAGAGC
4	398.6	E5G10	F - GTGTCAAAATAGTAAAGCCCAAAAAG	TGCGE	88	45817494, 45817552, 45817939, 45818069, 45818557, 45819111; 45806711, 45809298, 45810104, 45814227, 45815162
			R - TTGAACAATGAAGTTACATAGACGTT
4	405.7	E23C6	F - TAAGACCTGCTTCACGTTTTGCTAC	PE - AAGTCTTGACAAAGTTAATTCGGGTTTGCC (G/A)	88	45833103, 45838312, 45843336
			R - CAAGTAAAGGGTTTCTCTTGTTAAGG
4	408.1	E8E5	F - CAGGAAACTATGTGCAGAAGATCTAA	TGCGE	87	45831254; 51009284
			R - GTTTCTCCAGTAGTAGGATGTGCCT
4	413.9	E17C2	F - TATATGCTTCTGTTAGGAACATCTGG	TGCGE	91	45828413, 45829732
			R - CTAAAAGATCTAAAAAGGGCACATTC
4	416.3	E5E7	F - CATTGGTATTCAGCCTTATAGGTTTT	PE - GGGCACGCAAGGTGCCGT (C/A)	82	45818060, 45818301, 45819306, 45819596, 45837470, 45837495, 45837520, 45837609, 45838035, 45838320, 45838359, 45838509, 45838619, 45838697, 45839869, 45840247, 45840746, 45840834, 45841347, 45841377, 45841607, 45841904, 45842569, 45842777, 45842852, 45843076, 45843196, 45843486, 45843497, 45843501, 45843618, 45843737, 45843811, 45844262, 45844490, 45844557, 45845107, 45845319; 15951048, 15951202,…
			R - TTGAGATCAGGTTTATTGGTTAAATG
4	469.4	E15A1	F - ATGCGTACGAATTAAATATGAAACAA	PE - GGCAATGTGCCGCAAGTCGCT (T/G)	87	45828736, 45837809, 45839169, 45844293; 15950844, 45803541, 45803776, 45808393, 45813598, 45815126, 45816841, 50993959, 50994133, 50994430, 50994501, 50995337, 50995651, 50995910, 50995933, 50995950, 50996862, 50996973, 50997111, 50997160, 50997537, 50997705, 50998119, 50998642, 50998910, 50999101, 50999176, 50999259, 50999610, 50999626, 51000196, 51000734, 51000912, 51001798, 51002264, 51002666,…
			R - TAAATCTTCTGTTTCTGCCTTCTTTT
4	478.8	E14G12	F - TCTGTATTGGAAGACTGCTTTCTTTA	TGCGE	90	45834665; 51000256
			R - TTCAGACTTTGAATGAACCTTTAACA
4	495.3	E19C8	F - CATGAATACTGCTGCTAATCAATAGG	TGCGE	90	45818389, 45819053, 45828683, 45828684, 45830245, 45831653, 45831987, 45832191, 45833315, 45834818, 45835136, 45841533; 45811715, 45815096, 45815537, 45821212, 51000122, 51000714, 51002424, 51003093, 51005083, 51005184, 51007412
			R - ATCTTCAATAGTAGGGGTGCAAATAC
4	502.4	E12E2	F - GGTAGGAGAACAAGACAGGTTATTTC	PE - CATCTTAGTGTACGCTTTATACTATTAAAA (C/T)	84	45827835, 45831059, 45840344, 45841014, 45841161, 45841996, 45842874, 45843073, 45843646; 15951228, 45805974, 45816425, 45822132
			R - GATTTTGTTTCTAACAAGCCTTTCTC
4	502.4	E18C3	F - GTATTTATAAAGATTTTTGGAGCCGT	PE - CGTACCTGTTTGTTTTTTTTTCCATGCATT (G/A)	86	45827944, 45832647; 15950985, 45803384, 45803405, 45803429, 45803652, 45803826, 45803978, 45803996, 45804045, 45804733, 45804891, 45805399, 45805404, 45805604, 45806652, 45807494, 45808099, 45808623, 45808929, 45809530, 45810499, 45811228, 45813999, 45814038, 45815434, 45815460, 45816249, 45820835, 50996875, 50999424, 51000176
			R - CTCATGAGTAGTCAATTGAAGGGG
4	503.6	E10C1	F - AGGTGGATCGTACAGAGACAGTTAC	PE - CGTACCTGTTTGTTTTTTTTTCCATGCATT (G/A)	88	45827944, 45832647; 15950985, 45803384, 45803405, 45803429, 45803652, 45803826, 45803978, 45803996, 45804045, 45804733, 45804891, 45805399, 45805404, 45805604, 45806652, 45807494, 45808099, 45808623, 45808929, 45809530, 45810499, 45811228, 45813999, 45814038, 45815434, 45815460, 45816249, 45820835, 50996875, 50999424, 51000176
			R - CGACTAAATTATCAAAAAGCTAAGGC
4	519.2	E10C11	F - CAGGAGGACTGGATCTTCTGG	TGCGE	89	45831764, 45832441, 45832473, 45833182, 45835469, 45835651, 45836216, 45837497, 45838200, 45838333, 45839693, 45840585, 45841225, 45841316, 45841579, 45842280, 45845145; 45806303, 45809013, 45809862, 45814218, 45820951, 50994355, 50995732, 50998231, 50999269, 51000018, 51000094, 51002860, 51007009, 51008693, 51009022
			R - GTGAGTACAAGCACTTTGGAAGTTAG
4	527.1	E16A9	F - TACCTCTATTTTTATTCATGTGCTGC	TGCGE	91	45830158; 45821678
			R - TCTTCTGGACTAGAACAATGAATCTC
4	531.8	cntg66	F - CAGCGGGCTATTCTTCCTTGTATCA	RD - BsuR I	91	45817340, 45818405, 45818910, 45831824, 45837195, 45837321, 45837928, 45837981, 45838024, 45838034, 45838196, 45838419, 45838937, 45839041, 45839171, 45839412, 45839950, 45840248, 45843643, 45843792, 45843858, 45844178, 45845224, 45845466; 15951002, 15951457, 45805883, 45806527, 45809087, 45809532, 45809957, 45810193, 45810230, 45811702, 45811771, 45812611, 45812771, 45812933, 45814130, 45814694,…
			R - GGCAGGAGGCACCCATGTAGTCACC
4	538.9	E16G8	F - GTTTGAAGTGTGACATTTTGTTCTTC	SP	90	45833248, 45834868, 45840688, 45840765, 45842328, 45842547, 45845356; 50994125, 50994439, 50995628, 51000379, 51000896, 51002859, 51003015, 51003919
			R - TTTAAAGAATACGTCTATGTGCAAGG
4	-	E10A7	F - AATCCAGCCTAATCCCTAAAGATAAT	PE - TTTGCAGCAGGACGTCTTCTCTT (C/G)	90	45828273, 45831656, 45832744, 45833285, 45834072; 50998136, 51008221
			R - CAAACTCTTCAAAACCTATCTCCTTC
5	39.7	E14E10	F - TGAGGACTTCATCTTACACTCTGAAC	TGCGE	91	45828082; 45804660, 50995017, 50997203, 51003377, 51006763, 51010305
			R - TATATAGCTGCGAGACCACAAAATAC
5	52.6	E12A6	F - GAAAGGTGGAAATACAGTTCTAAAGC	PE - ACCCCCTCCAGAAATCTTGGAACTGT (C/T)	87	45833958; 45816893, 45816897, 51009368, 51009433
			R - AATGACTTTAATCCTTCTTGGATCTG
5	63.3	E15E12	F - TTTATGACTGTTGCTGTTTCCTATTC	TGCGE	89	45834549; 50993592, 51004448
			R - GGGAAGAGATTTATTTACAGAAGCTG
5	81.1	E12A11	F - ACTGTTCCTTTTTAGGGATTCTCATA	PE - TGGAATTGCAACATAGTGGTGAACGCT (T/A)	90	45828547; 50995845
			R - GTAGTGCTCCAAAATAGTCCATGTTA
5	86.2	E11G11	F - TTTTCACCGTAATTTGTATGTTTGAT	PE - GTAGCCAAATTAGGTCCAATGAACTAATTA (T/G)	80	45818320, 45818866; 45812206
			R - ATACTTATTGATCACTTCCCCTTCAC
5	101.4	E17E4	F - CATATCGTAGTCTCCACTTGACTGAT	TGCGE	88	45832617, 45837330; 45809563, 51008038
			R - CAAAATTTGAATAGATCTTGAGGTGA
5	112.3	E16C7	F - GACAGGAGAATGAGTGAGTTACAAAA	PE - AGCTGTACAATTATTAAAGCCTAGCAATCC (G/A)	89	45829390, 45832178; 45803843
			R - AGAAGTGTTTCAACAGCATTATATCG
5	112.3	E9C9	F - GAGTCTCCTTTAGGATTGACGTATCT	PE - GTTACAGCATCAGTGGGATGTGGTATGT (A/T)	29	45834778; 50995197
			R - GCTATGTGAGCAGAGATAAAAGTCAG
5	116.9	E22E3	F - ATACAGTGCCTCTTATTCAAGAAATG	PE - AGTACAGGGCTCTTATTGGTAGCCCAT (C/G)	87	45829657, 45831439, 45844979; 45808426, 51005452, 51010206
			R - TATCCAAGATTACAATTTACAGAGGC
5	119.5	E9A6	F - ATCATGACATTTTTAATGTAGCTTGC	TGCGE	83	45834902, 45837629, 45839985, 45841546, 45843842, 45844585; 45811162, 45820320, 50998357, 51009155
			R - ATAATATAAGCCCACAAACAAAGAGG
5	123.1	E5G5	F - CTATTTCATCTGAGTACCGTTGAATG	PE - CCATGGTGCAGGAAGAGAGCCTATAT (G/A)	90	45818116, 45819013, 45836571; 45808542, 45812433
			R - TAATGTAGAACTAAATGGCATCCTTC
5	155.6	E11G4	F - ATTCGTCATTGGAGTTTTAGGAATAG	PE - TGAAGCATTACATGTCCAATATCTAACACC (C/A)	83	45832606, 45838378, 45840111, 45840751; 45810144
			R - GGTCTGACTTTATTCTGCCAGTATCT
5	162.6	E17C12	F - GTGTGCTCAGTGTCAGTGTGTTATAC	PE - AGACAGAAACACTCTGTGATGAACCATTTG (T/G)	79	45830131, 45831544; 51007406
			R - TATCTGCATCATAAATAAAGGCTGAG
5	181.8	E10C3	F - CGAAGGATTCGTGTAGATTTCTC	TGCGE	82	45832697, 45834183, 45835787, 45837721, 45837897, 45838061, 45838368, 45840657, 45840737, 45842176, 45842195, 45844380, 45845302; 15951086, 45805924, 45806074, 45813919, 45814217, 50993492, 50993502, 50993851, 50993903, 50993912, 50993972, 50994152, 50994230, 50994267, 50994411, 50994599, 50994799, 50994944, 50995146, 50995352, 50995505, 50995763, 50996019, 50996191, 50996629, 50996643, 50996851,…
			R - CTTCTGCTTGAATACTGATCTCTGTC
5	198.4	E20A8	F - AAGATGAGGATACCATTGATGTGTT	TGCGE	91	45817501; 45803637, 45806411, 45816877, 45821053, 51006721, 51010369
			R - GCAGAGAAATAATATTGGTTTTAGCA
5	203	E7A11	F - AAGATGAGGATACCATTGATGTGTT	PE - CTTAGAGGACTTTACCAAAATGTTTGATCA (C/T)	88	45817501; 45803637, 45806411, 45816877, 45821053, 51006721, 51010369
			R - GCAGAGAAATAATATTGGTTTTAGCA
5	207.6	E12G1	F - CACTGTCAAAACATTGTTAGTTGATG	PE - ATTGAAAGGACCAGGATGAAGTTTGGACT (T/G)	90	45834381; 45820281, 51005737
			R - CTATGACGGTTTACAGCAGTGACTAT
5	207.6	E12G7	F - TATCTGAAATCCACAGGCAGATATAA	TGCGE	87	45835174, 45837587, 45837736, 45837969, 45838255, 45842971, 45843508, 45844850; 45804506, 45804870, 45806116, 45806302, 45807159, 45808870, 45809997, 45811524, 45811750, 45811827, 45812225, 45812907, 45812985, 45813536, 45814305, 45820349
			R - AGGAAGTTAAAACACTGCAAAAATCT
5	212.3	E22G12	F - GTAGAGTTTGTGATGAGACACAAGG	PE - TCCCAGTAACTGTCTGTGATCATAGGCT (C/G)	88	45828221, 45841689
			R - GGAGAAATCTGGTTGAGACAGTG
5	213.5	E14E8	F - GTAAAATGGAGACCTCAAGAAAACAT	PE - GCGATCTTCTAGCAGGCAGAACAGGA (G/A)	88	45831587, 45832821, 45835544, 45835711, 45840023, 45841429, 45841885, 45844002, 45844602; 15951570, 51004191, 51009114, 51009900, 51010114
			R - TCACAATCAGTATTGGAGGACTTAAC
5	213.5	E13E6	F - TCCATGTATAGGGAACATTTTACAGA	TGCGE	85	45835300, 45841814; 51000192
			R - GTAAGACCTAGCCACTGACTTCTAGC
5	217.5	G1D5	F - AGACCCTTGCTGTGTAACTGCT	RD - Alu I	81	45819274, 45828781, 45830711, 45832074, 45832742, 45838951, 45840050; 15950927, 51003750, 51004098, 51009785
			R - GACTGGGACTGACTTCTATGACG
5	227	Hoxd8	F - CGGACTGTAAATCGTCCAGTGGTCAC	RD – Hpa II	36	3551782
			R - GCTGGGAACTTGTCTTTGTTGTTCTC
5	227	Hoxd11	F - ACATCATCTTCGGGACTGTAACAAGG	RD - Sau96 I	91	3551784
			R - AACCAGGTCCCCTTAGTTCTATTCAGG
5	230.4	E13A7	F - GCTCTAGTCAGTGTCTTTATTCCACA	PE - ATTAATAGGATCAATCTGAAGACATTATGC (A/G)	89	45832861; 45804110, 50997446
			R - TGTGAATGGCTGTTAGAATGATAAAT
5	231.6	E23G2	F - TTTTACAGAACAAGAATTATGACGCT	PE - AAGCACAGTGTGATGCCTCTCACAC (A/C)	88	45828857
			R - CATGCAGAAATAAGTGCTGATAAAAT
5	245.6	E26A8	F - ACAGAGGGTGACGAAAAGAATTT	TGCGE	92	45836029
			R - ATAGCTCTCAAGGTGCTGACAAAG
5	263.1	E14E2	F - ATCCCGTATATCATTCTAAACCATGT	TGCGE	89	45829660; 45812173, 51005444
			R - AAAAATATCCCCAACTAATTTCAGTG
5	281.3	E26C11	F - CTTTGAACTGAGACCGGACC	TGCGE	89	45830524
			R - TGCAGAATGATGCCAGCAG
5	294.9	E24C3	F - ACTACACACAGGGAGAAAGACCTTAT	PE - AAAGAAACGGGAGGCACAGGATAGC (G/A)	85	45838374
			R - TAAACTAGTACACCCAAGTCAGCGTA
5	-	E16C9	F - TTCTACGAGTGCTACTGAAAGACATT	TGCGE	84	45829767; 50998371, 50998591
			R - CACTTTTGTTTACTGTACGCTTGAAT
6	0	E12G2	F - AGTTATGCATTGGTTCTTATGTTCAC	TGCGE	83	45831865; 45817178, 50997351, 51003899, 51004402
			R - AAACAAAGGAATGTTTTGAATGACTT
6	10.3	E24G11	F - CTCCAACTTTTGATTTCAGTGTAAAA	PE - AGTGACCGCGGTCAAGTGCAAA (A/C)	87	45828092, 45832820, 45838176, 45839397; 50994155, 50994408, 51000455
			R - AGGATTAAACATAAAACATTTAGCCG
6	34.3	E7C1	F - GCACCCTGGAGTCCTATTTTAACT	PE - ATCAGATGCATGAACTGTAAAGCTTGAAC (A/C)	89	45833497, 45840323, 45841504; 45806954, 50994773, 50997422, 50998570
			R - ATGAGAACACTTTCAATACAATCGTG
6	45.2	E9A11	F - ATACTGAACCAGGAACCCAAAATAG	TGCGE	86	45835485, 45844958; 45810325, 45817291
			R - GGAACCGGATTGAAGAGTAAAGAC
6	51.5	E19E5	F - GGTGTAATTTTAGCATCCTTCATTTT	PE - GCAATGCAGGAAGTGACTGGACAAAAATA (A/C)	85	45833771, 45835938, 45836610, 45841899, 45844475; 45806595, 45811805, 45815928, 45816915, 50995548, 50999750, 51000973
			R - ATAACACATGCATACCAATATCGTCT
6	57.6	E24C12	F - AAAATACAAAATGCAGATGGACTACC	PE - GCAAAATCTAGAAACCACTTAAAGTGAAAC (G/A)	86	45818017, 45833515
			R - CTCAACATAAACACTGACATCCTTTT
6	61.3	E14A1	F - TTCATTGAACTATTTGCTTCCTTATG	PE - ATTTTACCAAATATTAGTTCAGCAAAAGAC (C/A)	84	45828380, 45830738, 45839898; 51006160
			R - AAGGCTGATGTAAGGAGTTTATGAAT
6	61.3	G2L21	F - GAATCTAGGTCCAAGCAGTCCCATCT	RD - Msp I	58	15951232
			R - GACCATCACACCACTACCCACACTCA
6	83.4	E13C7	F - CAATGTGTATGAAAGCTGGATGTAAT	TGCGE	86	45829874; 51004704
			R - CAGAATAGAGCCCTGAAAGTAGAAAG
6	97.5	G1I8	F - ACCTGCAGTGGGCTAAGACC	RD - Nla III	85	45831331, 45837440, 45837773, 45837918, 45839002, 45839332, 45840272, 45840867, 45841189, 45841269, 45842041, 45842603, 45843575, 45843668, 45843880, 45843952, 45844009, 45844339, 45844791, 45845383; 15950932, 45804082, 45805024, 45805692, 45805816, 45808296, 45816928, 45816935, 51003816, 51003949, 51004629, 51005804, 51006531, 51008382, 51009602, 51009760
			R - ATGGAAATAATAAAATAAAATGTT
6	98.8	E24G3	F - AAGATGCAGTGCTGTCAAAATATCTA	PE - GAGATGACACGCATCGCTTTCCCA (C/G)	91	45833192; 51000430
			R - CAGCCCTACATAAAACCACCAATA
6	98.8	E7C4	F - TGCGTAATGTTTCTTACTACCACACT	TGCGE	86	45833192; 51000430
			R - GACAGTTTGACAACAATGAGTTTCTT
6	99.9	E24G9	F - ATCTCTATCCCTTCTAATACCCGC	PE - AATGGACCAGTGAAATTCAGCACTTATGC (G/A)	86	45828731
			R - GATAGACAGACTTTACATTCCTGCAC
6	107.5	E17C1	F - AAATATGTATTCTGGGAAAAGAATGG	PE - CAGTCAGGAAAAGGAAGGCCTGCA (G/A)	85	45829465, 45831753; 45816652, 51007988
			R - ACGTGCAGCATATAGAAAATACAAAG
6	119.1	E14A2	F - CGTTGGTTAACAGTAACCTCACTAAA	PE - AGGTCCTTCCGCTCACAAGGAGAAA (A/C)	82	45834063, 45836396; 50995668
			R - TGCTGTAGGATTCTCTACTACAGGTG
6	139.1	E13G4	F - CTACAGGACACATTTAGCAGATCACT	PE - TGGAGGCTTGTAGCGGGCAGT (C/T)	86	45833170, 45841858; 51002918, 51003861, 51005897, 51006357
			R - ACATTCAGGTTACCAAGACAAGAAG
6	155.3	E10G8	F - GAAGATGACAAATCAAAAGACAAAAA	PE - AATCTAGTGGTTCATAAGAATTCTGTATCT (T/A)	87	45835784; 45816190, 50998724, 50999283, 50999597, 51005047
			R - AAAATGTGCATCGTTTTAACCAG
6	158	G2F2	F - CACACCACAGACGCATTGAC	RD - Taq I	57	15951137, 51008096
			R - TCCCCAGCCTGTGTAGAAC
6	177.5	E14E3	F - TGTCTATAAAGCTGGATTTGTTTGTC	TGCGE	88	45829178; 45810392, 50996883, 50996936, 50997676, 50999739, 51002541, 51003853, 51010486
			R - ATGATGTACCCTCCACATTACACTTA
6	186.7	E17G4	F - AGATATTTCAGGAGAAAAGGAAGTGA	TGCGE	91	45818936, 45819137, 45819203; 45808366, 45810290, 45815200, 45816594, 45817200, 45817248, 45817249, 45820364, 45820920, 45820949
			R - TGTTTGTGGCATTAAAACAAAACTAT
6	190.1	E15E9	F - GAGTTGGTTTCCTACCTGATTTATCT	PE - GCAGATGGCTAGGGCCAAAGGTT (G/C)	88	45832827, 45835509; 45810497, 45811575, 50996901
			R - AATACAGGGCATCTAGAAAGAAAAGA
6	229.4	G2G14	F - CGGCGCCTGCTACAAAAACTGGTG	RD - ScrF I	85	45817323, 45818257, 45818803; 15951147, 45816447, 45816493, 45822130
			R - GCTTAGCTTGGATCTGTGCCTCTC
6	241	E23E11	F - GTCTCCTCCACTCCGTAGCC	ASA	90	45832023
			R - GTCTATGCGCTCGAGTCACC
6	251.7	E25G7	F - GAACGATGGTTATGTTCTCATGTC	PE - AGCCAACCACCTGTTTGCATTGCT (C/G)	87	45830301
			R - AGCCTAGACATTACTATTGAAGCAAA
6	258.6	brachyury	F - CTCTGCCAACCTGCTTACCTTCTGACACTG	RD - Msp I	30	14280013
			R - AGGCTGGCAAACTTCTGAGGCACATAG
6	258.6	E9E11	F - GATCGCTCCATTGCTGTCTTAT	TGCGE	91	45831270, 45837921, 45843360; 45807820, 45808712, 45815660, 45816380
			R - GGGGGTAAATACAGACTAATACTGCT
6	268.7	E15A6	F - ATGCTGAAATTCACTCTGTATATTGC	TGCGE	91	45836086; 51004453
			R - CTAGGTCTGTCTTATTGAACTTCCAG
6	270	E12G12	F - ACGAGATGACCAACTATAGGAATGAT	TGCGE	77	45835207, 45845080; 50999579, 51001339, 51010187
			R - GTAGTATCTTCGTCCTCGTGATCTTG
6	292.1	E8A7	F - AATGTTTCGCTTCTCAAACTTAAAAT	TGCGE	91	45830097; 45815441, 50996802, 50997097, 51000937, 51001446, 51007045
			R - TTGACATCTCGAAACACTAAATTGAT
6	293.3	E16C8	F - ATGTGCAGGTTTAAATGTTTCAGTAG	PE - CCTGAACAGTTGCCTACAGGTGCA (C/T)	90	45817700, 45830096, 45831565, 45832528, 45834705, 45835464, 45844152, 45844683; 45814849, 45822141, 50993452, 50993939, 50994718, 50995099, 50996131, 50996407, 50997292, 50997709, 50999331, 50999707, 51000419, 51000432, 51000960, 51001805, 51001993, 51002281, 51002868, 51002953, 51003177, 51003923, 51006406, 51007480, 51007698, 51007759, 51008787, 51009726, 51010783
			R - ATATCACAGTTTACAAATAACCGCAA
6	294.4	E14C3	F - AGCCTTAATTTCATGTTCAGCTTTAT	PE - ACACGTGAACGATATCGGTCTTATTCAGC (C/A)	86	45829647, 45834437, 45844428; 45807501, 50996344, 50997466
			R - TAGTTTCTTCACAAAACATTAGCACC
6	308.6	E13G11	F - GTATTTCCTTCAATGACCATAGTGTG	PE - TGTCTGATTGCGCAGCTGTCCTTT (A/G)	86	45831833, 45835643; 51003238
			R - GTCAGGGTATAAAAAGGAATGATGTT
6	308.6	G1D6	F - CAGCGTGCCCACCCGATAGAA	RD - Taq I	85	45833037; 15950928, 50997284
			R - TCCCAAAAAGTAAAATGTGCAAAGAAAA
7	25.8	E26G9	F - TAACTGACTTGACTAACCCCACTATG	PE - TTTGACTAAAGGTCATTTCTTTTTTAAAGA (G/A)	90	45835939; 34733870
			R - GTCCATTGTACAAAGCCTCTATTAAA
7	41.4	E13A3	F - AACATGCTTCTTTTTATGCTTCTTTT	TGCGE	87	45836007; 45803535, 51005396, 51006569, 51010247
			R - TTACCTTAAAACACTTATGCCAGATG
7	96.7	E12C4	F - GCGACATCAATTTACCAAAGTATATG	PE - GTTTTAGAACCAGCCATATTTTAAACAACC (C/T)	86	45832032, 45835745, 45836275, 45845437; 51005612, 51007475
			R - CCCTCATTGTATGGTTACTATTCCTT
7	102.8	E22C3	F - AACTAACCGAGAAACAGCAACAG	PE - GGTAAATCCATGCTGGGTGTTTCGGG (T/G)	87	45836043
			R - AATGTAGGACTAACCAGTCAAGGATT
7	113.4	E11E11	F - CTCTACATACTCTGCCTGGTGATCT	PE - GACGCTGAGCCTAGATGCGCC (C/A)	89	45832389, 45835947; 45805182, 45809185, 51002012
			R - CACTTTGGTTTTAGAGTCACTTCTTG
7	113.4	E12C1	F - GTAACCGTTCATTTTTCTAGGTTCAT	PE - CAGCAGTGTAGCTTAAAATACCCGACG (G/C)	86	45830381, 45835030, 45840391; 45804557, 45807153, 45816344, 45816350, 50993429, 50993884, 50994264, 50994330, 50994535, 50995077, 50995471, 50997242, 50998098, 50998555, 51002460, 51002777, 51003810, 51003824, 51003970, 51004806, 51007777, 51008593, 51008781, 51010490, 51010625
			R - TGCAATTCGATAAAAAGTAATCCATA
7	113.4	E16E10	F - GTTCCTTCTTTGCATCTGTGTGT	TGCGE	32	45828066, 45834667, 45836455, 45839014, 45843220; 45809418, 50997377, 51000117, 51003176, 51004831
			R - GTAAAGTCCTCCCCTAGATAGTTCCT
7	120.6	E12G10	F - ACTTTTCTCTGTGGGTAAGTGAGAAT	TGCGE	89	45827842; 45812913, 51004545, 51008211
			R - TGATATATTTAAGGGAAGACAGGAGG
7	178.4	E12A7	F - AAAATTGTGACCATTCACTTTTGATA	PE - GGGTATTCCACGTGCCATGTCCTC (T/C)	82	45836550; 45806533, 45815136, 51004505, 51008172
			R - CGTTGCAATATGAGTAAAAACAGACT
7	186.3	E19G7	F - ATTGGGACTCTTGTGTTCTATAGCTT	PE - GGTGGAATGCTTTGAAAACATGTATCGGT (G/T)	88	45828218, 45831277, 45833406; 51003602, 51005639
			R - AGCATAGACTGCACACCTTACTTAGA
7	186.3	E11G2	F - TAGTGGAACATTTGAATGAGTTTAGC	TGCGE	86	45817603, 45830123; 51009498
			R - TCTAGAATAGAAGCAGAACCTCAACA
7	186.3	E17A2	F - CTATAACACGTCAATGTCCCAATATC	TGCGE	91	45828115; 51002463
			R - GGACTTGGATAAAATTTGTCTTTGAT
7	191.7	E15G9	F - CAAGGAACCAAACTGTGTAGATAAGA	PE - CCGCAATGTCACTGAGAAAGAACTCCA (C/T)	87	45828805, 45829672, 45830745; 45803991, 45811021, 51005674
			R - AATTCTTCCACTTTACAACAGTACCC
7	207.7	E21G12	F - AGAAAGGCCTCAAGAATGTGTTT	PE - AAACCATTATACTGTGTGGAGTGGATTTGC (C/A)	87	45818823, 45828861, 45829930, 45830332, 45831196, 45831806, 45834602, 45837542, 45838060, 45842133, 45842237, 45842483, 45843341, 45843874, 45844555; 45803695, 45808568, 45808588, 45809856, 45811790, 45813014, 45821920, 50994714, 50998312, 51000376, 51002026, 51003529, 51007748, 51010849
			R - AAACAGTCGGACATTAGTCTGTTATG
7	212.8	E13C1	F - GTGTATGTAACTTTCCTCAGAGTCCA	TGCGE	84	45836237; 45816400, 51005661
			R - ACAGTAGCACCCTTAGTTAAGCAAAT
7	216.4	E15C8	F - TATATATGTAATCATCCATTGGCAGC	PE - ACAGAACTGCATATAACAGTATTCTTTGCT (A/T)	86	45832115, 45832122, 45836178, 45838883, 45842171; 51009040
			R - ATTTTACATGATCTTTGGCATCATAA
7	216.4	E22A3	F - GAAGCTGACACTCTCTGCACTTATAG	PE - AGAGGCGTCCTCAAGCCTCCAA (T/A)	89	45817628, 45818829, 45818928, 45819538, 45828530, 45834973, 45835176, 45835198, 45836219, 45837474, 45837643, 45839763, 45840102, 45842124, 45843460, 45844563, 45845154; 15951157, 15951161, 15951327, 45807072, 45807438, 45809424, 45809535, 45810315, 45810371, 45810387, 45811661, 45814867, 45816861, 45821221, 45821718, 50995828, 50996226, 50997253, 50999182, 50999559, 50999688, 51001778, 51002780,…
			R - ATTAAAGGGTACAAGAAAATAATGGTG
7	239.7	E9E10	F - CAATGACTAACTACTGCTAGTCCCAC	TGCGE	87	45828272, 45841389, 45841921; 45805040, 45816050, 50993780, 51003905, 51004262, 51006421, 51006467, 51007155, 51007282, 51007478, 51010232, 51010829
			R - AATTTAAAAATAGCCACTGGATGAAC
7	260.3	E18E11	F - TGGTACTCTCAGAAAAAGAAAAACAA	PE - GAAGTCGGTGCACAAACCTCCATAAAC (T/G)	86	45828753, 45830271, 45835858, 45836020, 45836838, 45839811, 45839881, 45841018, 45843922, 45843924, 45845324; 15951121, 45810607, 45816659, 45817146, 50997474, 50998909, 51000339, 51002726, 51005016, 51005495, 51006111, 51007043, 51007918, 51008115, 51008515, 51008926, 51009527, 51010637, 51010821
			R - AACTAATCGTTTACCGTTCATTTCTC
7	261.5	v2p3a5	F - TTTACACAGAAACCTTGTTTATTTGGC	RD - Mse I	91	45819038
			R - TTTAAGGATGCTTAGAGGCAAAGTATT
7	263.9	E16E2	F - GGTTTTAATTGTGATCAGTGGTACAG	PE - AGCTTGGCTTTAGGCCATTTTGAACAATC (C/A)	84	45836282; 50993988, 50996777
			R - AAAGAAATAAATAGGGCAAACAACAC
7	273.8	E7G9	F - GAGTAGACTGAACGATGAAGGATACA	TGCGE	66	45830193, 45835516; 50998840, 51008614
			R - AAAATTAAAATAAAACAATGGGCAAG
7	278.8	E6A11	F - ACACTTCCAAACTAAGGAAGAAAGTC	TGCGE	70	45818979, 45819077; 15951145, 45803968, 45807341
			R - CAGAATTAAAGAAATGAATGCGTATG
7	-	torsina	F - TCCGCATCACAGAATAAGGTCAATAGTC	RD - Ava I	92	15950849
			R - GGGCAGCAGGTCGCAGGTCAAGTCAT
7	-	E8C11	F - TGGTCAAGTAAATTATGAAGAGTTTG	TGCGE	91	45817650, 45817930, 45818216, 45818222, 45818452, 45820158; 45806929, 45811810, 45812420, 45814862, 45815676, 45816786, 45821370
			R - ACCTCTTTTAAGTTCCTTTGATGATG
8	0	E14A8	F - TAGTTTTTGTAAATGCTTTGATCCAG	PE - TAGATTCGTTCCGCATTGTGGAATTGGT (A/C)	86	45831014, 45836079; 50996359, 51000205, 51000221, 51000464, 51008868
			R - AGTAATTTACCCGTTGACGAAAATAC
8	13.9	E8A2	F - TACTCTTCTCCATTCAGGCCCTAT	PE - CATGTAAAAGAAAAGTCCGGGCAGC (T/G)	85	45828526, 45830161, 45831449, 45835081, 45839427, 45843791, 45844407; 15951224, 45808649, 45808945, 45809858, 45811221, 45811291, 45811292, 45811336, 45812375, 45815653, 50993451, 50993791, 50995112, 50995238, 50995753, 50995794, 50996504, 50997432, 50997450, 50998604, 50998644, 50999078, 50999591, 50999787, 51000109, 51000303, 51000919, 51001483, 51001630, 51002010, 51002458, 51002647, 51002964,…
			R - CAGTCACTTCCAATTAAGACCTACAA
8	15.1	E7G10	F - AAACATTTCATTTATTTCTACCTGGG	PE - CCTGGGATGGGACATCGCATC (G/A)	89	45817361, 45817366, 45817786, 45818167, 45818610, 45819256; 45804553, 45807436, 45808134, 45808192, 45809057, 45810646, 45814435, 45814553, 45816372, 45816442, 45816528, 45816656, 45816690, 45816792, 45817002, 45817005, 45817007, 45817086, 45820998, 45821351, 45821407, 45822089
			R - TAAGCTTTCCTCAAGATCTTTACAGC
8	19.7	E29C4	F - AAGTGACAGTGAAGCAGCTCAG	ASA	90	45828951
			R - ATTAATTCACTCCAAATGACTCCAG
8	20.8	E14G3	F - ACTACAGCACACAGCCTTAACATTAC	TGCGE	90	45817716, 45818739, 45818903, 45819035, 45819239, 45833157; 15950822, 15951150, 15951542, 15951590, 45803656, 45803757, 45803919, 45804485, 45804831, 45805084, 45805139, 45805203, 45805577, 45806217, 45806392, 45806445, 45806650, 45806851, 45807080, 45807377, 45807513, 45807743, 45807956, 45808047, 45808514, 45808754, 45810372, 45810389, 45810477, 45811437, 45811577, 45811764, 45812159, 45812208,…
			R - GACCTACGTGGATGGTTTAATAAAGT
8	25.7	E15G10	F - TTGTATGGAAGAACCATGTACCTTTA	PE - ATTATTTTAATATGCAGAATAACACTAACA (G/A)	83	45833036; 51010286
			R - AAAGTCGAAATTGTCAATAGGGTTAG
8	36.4	E12A1	F - ATTTTTCAAGCTCAAAGAGGATTAGA	TGCGE	84	45835386; 50995456
			R - TAAGCTGCATTTTCAAGATGTATTTC
8	60.5	E16C12	F - TATAGACAAAATGGAGTCTGCTCAAG	PE - CCTCTTTTGGGCGAGCCGAGTC (T/G)	90	45834209, 45837193, 45837458, 45845102; 51005077, 51008313, 51008518
			R - ACATTTATTGTACCCTGCATATGGTT
8	64.1	E20C8	F - TTATTAGTGCAGCTATTATGGCACTC	PE - CTGTGAACGAGAGTGGTCTGACGTAAC (T/C)	84	45829422, 45835738; 45806223, 45808801, 45809876, 45811780, 45816967, 51006681, 51008376
			R - AGTAGAAAAGCAGTTTTACAGCACAA
8	65.3	E19A11	F - ACTGAGTGTAGTCTTCAGTCCTTGTG	PE - AGCCAGAGTAATCCAACAAATGCAGCA (G/T)	88	45817343, 45818195, 45818484, 45819037, 45819303, 45820023, 45820081, 45820107, 45837755, 67528119; 15950832, 15950879, 15951518, 15951618, 45803412, 45803480, 45803828, 45804064, 45804173, 45804190, 45804351, 45804416, 45804523, 45804683, 45804708, 45804801, 45804810, 45805276, 45805515, 45805565, 45805643, 45805783, 45805959, 45806240, 45806718, 45806940, 45807402, 45808019, 45808094, 45808936,…
			R - GTGGTTCAATCTTTATTCAAAGACAA
8	66.5	E19A12	F - TGTAATGTTTAAGGTCCTTGTTTGAA	PE - CAGGGATGGCTGCCACTTGTAAAAAC (G/T)	87	45835839, 45844324; 15951280, 45809289, 45809437, 45811276, 45811896, 45815001, 50993552, 50996975, 50997911, 50998093, 50998472, 51000681, 51000696, 51001230, 51001270, 51001551, 51001888, 51002756, 51005113, 51008511, 51009083, 51010386
			R - ACAAAATGAAAAAGAATACCCTTGAG
8	66.5	E24C7	F - AGACCATACAACTTTAAATAAACCCG	PE - AGTGAAATAGAGTTGTAGAAACAAGCGTGT (G/A)	82	45828548, 45831573, 45832373, 45837006; 50996452, 50998223
			R - TAAAACATACACAGGTTGTCTGGAGT
8	66.5	v2p3b1	F - AGTCACTGTGTTACATTATCACCCAC	RD - Bsl I	88	45817510, 45817525, 45817668, 45818128, 45818140, 45818206, 45818560, 45818612, 45818924, 45818993, 45819027, 45819033, 45819128, 45819415, 45819470, 45820019, 45835630
			R - TATACACTGCGGTCTGCATCTACT
8	66.5	E15E3	F - ACATTCATGAGACAATGCAGTAATTT	TGCGE	84	45834595, 45836132; 51005508
			R - ATCTAAAAGCATAGGGACAGGTTAGA
8	66.5	E17G2	F - ATTTCACTGCAGACTTGTGTATAAGG	TGCGE	91	45828548, 45831573, 45832373, 45837006; 50996452, 50998223
			R - TACTGGATAAGAGTATAGATGCGTGC
8	79.6	E16A5	F - TGCCAGAAAGTTAGATAAACTGAAGA	TGCGE	89	45829104, 45829414; 45804019, 45804038, 45805055
			R - ATAAGTTATTTCATGCCCCATAAGAG
8	85.2	E16C3	F - GACCTCTGATAATTAAAGGCACAAAT	TGCGE	91	45835761; 51003840
			R - GTTTGTAACTTCTACAGCTCCCTACC
8	86.5	E10A3	F - GATGCAGTCTTCTTTTTACTTAAGGG	PE - GGTGGCCTTGCTGTCAAGTTTTCAC (G/C)	81	45818974, 45838265, 45841908; 50993713, 50996959, 50998112, 51007945, 51009476
			R - ACATGTATGCACAAGAATTGAAAAAT
8	87.8	E10G10	F - CACTTAAGTCCGTCACAGCTTTTT	PE - GTGGCTACGAGAAGCAGAAGACGA (A/G)	76	45829593; 45812777, 50998275, 51005406
			R - TTTATTCCTTTCTTCATAACGCAAAT
8	89.2	E12E10	F - AATTAATTATTCAGCCCAATATGGTT	PE - TGAGCATCAGGAAGTGCTTTTCCTGC (G/A)	84	45829431, 45832855; 51000669
			R - GAACTAGACTCCTGCTTTAACCAGTC
8	91.7	E13E8	F - AGTTAACGCTTCATATTGAAGACAGA	PE - GTACGAGTCAAGAGGAGCCATTCAGC (G/A)	86	45833113; 50997009, 50999731
			R - AAAGGGGTACACAGTTAACAAAAATC
8	96.3	E18C10	F - TCATTCGTGGATGTTTTACAGTATTT	TGCGE	92	45817482, 45818190, 45818688, 45818710, 45829167, 45829254, 45831384, 45833922, 45837309, 45838129, 45841132, 45841657, 45844867; 15950918, 15951303, 45806419, 45807102, 45807340, 45808733, 45810810, 45812637, 45812782, 45813627, 45814129, 45814415, 45814637, 45816276, 45816364, 45816679, 45816845, 45817027, 45817096, 45820922, 45820930, 45821769, 50995170, 50995229, 50995273, 50995292, 50995884,…
			R - AGGTAATACAGTTAGTTGCACACAGC
8	106.3	pcna	F - CTTTAAGCTGCATTTTGAGTTTTAGTT	RD - Alu I	81	45817751, 45828601, 45832245; 45804376, 45815113, 45816032, 45817023, 45817087, 50996169, 50996613, 51000488, 51001827, 51002105, 51007873
			R - GCTTCATCTATCAGGTCCTTTAGGG
8	124.2	E21E4	F - GTTGCAGTTGGACTTACAGTAGTCAT	PE - CTATCATATCGCAACAAAATCTTCTTGACT (C/G)	86	45829039, 45829321, 45830579, 45832498, 45841152, 45842251; 45810466, 45817280, 45821201, 51003946, 51004061, 51007299, 51008343, 51010449
			R - CTAAGTTTCATTGAGGGTAGAAAAGG
8	128	E11A8	F - ATGGAAAAGCAATAAATGTGTTTGTA	PE - CCGACTAATTCATCAAACAAACTTGATACT (C/T)	83	45836482, 45845151; 45807986, 45809428, 45816312, 45820549, 50994033, 51000285, 51003830
			R - CATAGGAAGGTAGTTCTTTCCACAAT
8	148.6	E7C9	F - ATAATTAGCTCCGTTCAATACTGCTT	TGCGE	90	45832907, 45834826, 45837290; 45810580
			R - GCTACAAAAGTGCATATTAGGTCAGA
8	166.2	E14C4	F - CTAACATGTATCTGTTGTCAAAGCCT	PE - CAGTGCAGGGTCACCTGCAAGA (G/C)	88	45829246, 45832281, 45836247, 45838963, 45845033, 45845124; 51010366
			R - ACTTAACACAGAATGAAAAGACCCAC
8	166.2	E14G7	F - AATTATATTCCCTTTCCATGTCTGTC	TGCGE	90	45831215, 45836887; 45816352, 51001811, 51004277
			R - TGCAGAAATATTTACGATTCTAGCAC
8	231.2	E27E7	F - AGGCTATGAATGGAAAGACTATTGAT	ASA	85	45818169, 45819705, 45830400, 45830443, 45830721, 45831863, 45833855, 45834912, 45840951, 45842614, 45844755, 45845291; 45803824, 45803909, 45803958, 45803970, 45803972, 45803985, 45803992, 45804034, 45804241, 45804452, 45804504, 45804762, 45804797, 45805013, 45805073, 45805363, 45805611, 45805835, 45805931, 45806162, 45806308, 45806478, 45806621, 45806826, 45806957, 45807047, 45807272, 45807749,…
			R - CAAGTTGAAATCAGATTAGCAGTATG
8	255.4	E12A9	F - GGAATGCATGGATTAAGGATTTATAC	TGCGE	86	45818905; 45821869
			R - CTAAACAAATGTTGTAGGGGAATTTT
8	255.4	E7A1	F - GATGTTTTGATCCTGACTACAACAGA	TGCGE	89	45827957; 45808973, 45811828, 51009386
			R - ATCACCAAATCCATTGCGTC
8	265.2	E14E1	F - AGACAATAACACAGGGAAGATAAACC	TGCGE	86	45835202, 45838677; 51006378
			R - CAACCACTCTTAACAAATACTGTGGT
8	270.2	E7A3	F - GTGGTTAACTAAGATCTGGAAAGAGG	ASA	86	45827892; 50998833, 51006898
			R - AATCAAATAATAGCTGCTCCATTTCT
9	5.1	E27A3	F - AGATGATTAAGGCGACCCATATTACT	ASA	91	45828614, 45829662
			R - GCCACAAGAAAACCAGAAAGTATAAA
9	22.5	E24A1	F - CTGGAAGACCTATTTTGGATAACAAT	TGCGE	85	45833856
			R - AAGATGAATATAACATGTGTTCCCTG
9	30.9	ntf3	F - GACATTCGAGGACACCCAAGTAAC	RD - Mnl I	91	51010364
			R - GCACAAACGCAGGATGTGTCTAT
9	43.4	E17C9	F - AATATTCTCAGAAGAATGGAAGCAAT	TGCGE	91	45830393, 45832632, 45843401; 51008778
			R - AATGTTACTTTTGACTAGCACAATGC
9	58.1	Wnt5B	F - TGCACGCTTCCACACCTTCCTCTA	RD - Bgl II	88	50994536, 62428
			R - GCGCGGCCCAGCAGTAAACC
9	59.3	E8E2	F - ACTGGACTCTATGTAGACTCAGCCC	PE - CCTTAACCTCCACACGAACTGCTTCAG (G/A)	88	45831667, 45832845, 45835647; 50995974, 50999091
			R - CTCTTCTTTTAAATACACGTTAGCCC
9	61.7	E30G6	F - CTTATAAAATGCCAAAAGACCCTG	ASA	85	45830825, 45830898
			R - ACACATTCCCCAGAGAAAACAG
9	78.4	E6G10	F - CAATCAAAGACCTCCTTCAGTGAT	TGCGE	87	45828210, 45837982, 45842129; 45804002, 45804493, 45805332, 51003112, 51003786
			R - ATCCCCATCTAAGTAAACCTCTAGGA
9	86.6	E6E12	F - CTTCCATTTAGGCCAAGTTTTAATC	PE - GCTTTCATCTGATCAGGCACACCATC (A/G)	90	45833486; 50994275, 51006463
			R - ATTCTGTTCAGAGGAACTTACAACCT
9	105.8	G2K2	F - CTGCCCAAGAAGACCGAGAGCCACAAG	RD - Alu I	61	45830505, 45830856, 45831640, 45833859, 45844625; 15951211, 45805687, 45805766, 45812407, 45813825, 45814708, 45815509, 45820568, 45820776, 45822031, 45822066
			R - AGCGCCCCCTGCACCAAAATCA
9	107.5	E19C9	F - CTTTATAACTAGGCCATCCAAATGTT	PE - ACGAACTGTTTTTTAATGTTATTACGTGA (A/C)	84	45820087, 45830505, 45830856, 45831640, 45833859, 45844625; 15951211, 45805687, 45805766, 45812407, 45813825, 45814708, 45815509, 45820568, 45820776, 45822031, 45822066
			R - ATAAGTCATGATATAGTGGCATCCAA
9	112.6	E12A4	F - AGAACCTGGAGTCTTACAGTACAACA	PE - AATGTTCTGCTGCCTGTCCTGCT (C/G)	86	45833508; 45806227
			R - TACACTTGTTTTGCAGTTAATAAGGC
9	119.8	E9A7	F - AAATTCAGTGAAAAGAGACCGATG	TGCGE	88	45831228, 45832886, 45834407, 45836721, 45838154, 45838996, 45839722, 45840128, 45840887, 45845472; 45804882, 51006376
			R - AAATTAGCAAAGGCAGAAGAATTAAA
9	121	E20G2	F - CAACAATTGAACTTGGACAACATTAT	PE - TCGGGTGGTAGGGTGGGGTGA (A/T)	87	45835378, 45837507, 45840026, 45841811; 45811786, 50999667
			R - TAGAACATCATATCTCAACAGTGCAG
9	121	E8G1	F - CAAGAAGGACAAGTGATGATTTGAG	PE - CCTCGGGGACCTCCCCTTAACTC (A/C)	83	45829483, 45831571; 15951061, 51009518
			R - GCTATAAGGCAGATGGTACATAGTCA
9	125.7	E17C6	F - CTTAACTACGTGATGATGGAACCTAA	TGCGE	89	45829152, 45830512, 45839960, 45840679, 45844379, 45844948; 45806351, 45816807
			R - AAAATTGTTTCTCGTACTTCACACTG
9	129.2	E17C5	F - CTTAACTACGTGATGATGGAACCTAA	PE - AGAATATTGACAACAACATTTCTGGAATGA (A/G)	88	45818481, 45819082, 45829903, 45834496, 45836599, 45841470, 45841477, 45842017, 45843344, 45844911; 45820546, 45820597, 51004298, 51004843, 51005758, 51007047, 51007743, 51007775, 51008752
			R - AAAATTGTTTCTCGTACTTCACACTG
9	129.2	E8G11	F - AAATCACAAGTGGATGTTTACGTTC	TGCGE	87	45830773; 50994903, 50997158, 51008711
			R - CAAGACTGTAAGTTTAGTGCAACACA
9	136.5	E23G6	F - AGAAACAAAAAGATCATGTTTGAGG	TGCGE	88	45817787
			R - ATAGGAACTCAACCTACATGGCTGT
9	151.9	E20G5	F - GTGAAGTCTGAAGACTGTGACCTTAG	TGCGE	91	45829627, 45835145; 45812326, 51009207
			R - AAGGCACTCAAAAAGCAAATAAAATA
9	154.3	E10E3	F - AGAATTAAACATTTGCGTCTGGAT	TGCGE	86	45828027, 45830190, 45830442, 45831882, 45834473, 45836639, 45843134, 45844593, 45844989; 45807064, 45808956, 45808972, 45808978, 45809174, 45814187, 45814797, 45814924, 45816429, 51003471, 51004273, 51005904, 51006078, 51006800, 51007765, 51007940, 51008479, 51008636, 51008801, 51009238, 51009720, 51010760
			R - GTTGATTTACTTGTGGTTAACCCTCT
9	155.5	E19E8	F - AATGTTTTGTGCACATTGTTTTTAAT	PE - CTATTTGGTATTTTCCAACATTTGCAATGG (A/T)	88	45828027, 45830190, 45830442, 45831882, 45834473, 45836639, 45843134, 45844593, 45844989; 45807064, 45808956, 45808972, 45808978, 45809174, 45814187, 45814797, 45814924, 45816429, 51003471, 51004273, 51005904, 51006078, 51006800, 51007765, 51007940, 51008479, 51008636, 51008801, 51009238, 51009720, 51010760
			R - TTACAAACTGGTTAAGCTAGACATGC
9	159	E23G1	F - GATGAAAATGAACAACTAAAACAGGA	PE - GCAGCTGACACGATAGGTGGTGG (G/A)	87	45830932, 45834641; 51009304
			R - GACGAAAATCAATGTCCATTCTACTA
9	166.4	E10G2	F - CTGACAGAAGAGTATGCCAAGTCTC	PE - CTTCTGAAACCTATCCAACGCAACTTTCTC (C/T)	85	45830319, 67527824, 67527825, 67527826, 67528113; 51008309, 51009782, 51010361
			R - TCTGTGGTTTAGAGTGCTTTTTCTTA
9	166.4	E12E1	F - TTTTCTTAGGTTAAAGTCCTGCATTT	PE - TCTTAAATCTGATTTCAGCTAATATCCTCT (A/G)	86	45829395, 45829861, 45839568, 45841070; 45808999, 50994548, 51001120, 51008554
			R - GGTTACAGTCTGTTGAAAACAGTGAT
9	166.4	E15C7	F - CGGTTTTACCATTAAAAGTAGGTGAT	TGCGE	86	45830926, 45838815, 45844146, 45845114; 50999455, 51000561, 51003596, 51004300, 51004971, 51007105
			R - TCTAGATAACGATAGCAAAAAGGGAT
9	170.1	UV	F - GAAGCGAGGTCTGCAAGGAGGATG	RD - Rsa I	90	4027888
			R - TACCGCAAGGAAATGGGAAGCAGT
9	176.4	E13C12	F - GCCCTAACTATGTTTACTGACTCACA	TGCGE	86	45833034; 51000296
			R - TGGTCATAATAAGAGAACCTTTCACA
9	176.4	E6A12	F - AGTTTGGTTACAGACGCTAGAGACAC	TGCGE	86	45832952; 45809232, 51006238
			R - AGTTTAAGATGGCTGCAAGAGGAT
9	191.5	E18E3	F - GAGGAAGATGAGGATGAGTTTTAAGT	PE - CGGACTTTAATCTGCTCGTAGAGTATGTAT (T/A)	87	45818024, 45830951, 45833813, 45833935, 45835336, 45835772, 45836837, 45836946, 45838252, 45838471, 45838649, 45838734, 45838887, 45839948, 45841301, 45841364, 45841512, 45842313, 45842804, 45844624, 45844629; 45806200, 45806572, 45806717, 45811458, 45811669, 45812306, 45815154, 45815878, 45816780, 45817236, 50995225, 50996493, 50998748, 50999825, 51000020, 51004135, 51005619, 51005721, 51006104,…
			R - GAAGAGCTTAAATCAGCCAACAAT
9	206.5	E8C7	F - GTACCGACATTTCAAAGAACAACTC	PE - CTTTCCTACCACAGACGAAAGAGGG (G/T)	86	45828243; 50998761, 51005125
			R - TCACTGACCCTAGAGAGTACAATACG
9	-	Mgf	F - ACCTCCCAAGTGACTACAGTATATC	SSCP	40	4325095
			R - ACCTCCCACTCAAACAGCTTC
10	0	E23A10	F - CTGAAACTTGAAAATGAGAGCTTAAA	TGCGE	87	45819445, 45828962, 45830068, 45833679, 45833780, 45834968, 45835214; 45808944
			R - CCAGCACATATCTTCTTAGAGGTACA
10	6.4	E24C2	F - GTTCCAAAGAATTACAAGTTGGTAGC	TGCGE	81	45833416, 45834816, 45836766; 50995102, 50997338, 50999536, 51001181, 51001749, 51004101, 51006542, 51008973
			R - TGGAATACAAGTGGATAACCAAGTAA
10	67.5	E20C4	F - ACTTCCTTCTGGCAAAAAGTATCTC	PE - CAGCCAGTGCCTCCTGGGTCT (C/A)	82	45817519, 45832084, 45833420, 45833574, 45834962, 45835481, 45837022, 45839844, 45843945; 45804819, 45806327, 45808960, 45809732, 45811304, 45812161, 51008164
			R - TCTTGAAATACTACTCAACCAACACC
10	75	E24A6	F - CAGTATCGTTTAACAGGGCCAG	PE - CATTTTCATCATGAAGTGGCTAACCTCTAT (G/A)	88	45835028
			R - GTTACTAACCAATCAAACAGCAAGAA
10	84.6	E20C2	F - ATCATGTTAATAGTGTATGTGCGGTT	PE - AGAAACATTAATGAGTCTTAATAATTGGTA (A/C)	86	45828225, 45828996, 45829174, 45842473, 45844154, 45845244; 45811462, 45812489, 51007965
			R - ATTTACACAGATTCTGCAGTACAAGG
10	97	E20C3	F - CTATGTGATGTTTGAATTGCTGGTA	PE - AACAGTCGCTGCCCTGTGGGC (G/A)	85	45833203, 45835535, 45841795; 45810430, 45810853, 45811560, 45814793, 50997019, 51002342, 51005869, 51007421
			R - GTAGGCAGATTTGTTTTGTTCATAGA
10	100.5	E7A7	F - CTGAGTACAAGAACTAAGCAAACTGC	PE - GGCAGGGGCCACCAAACATTG (G/A)	91	45834170; 50995587, 51002482, 51009267
			R - CAGCTAAGTCTTTTGTAAAGTGTCCA
10	105.3	E5G4	F - GCCATAGTGTCAGTCTTTTATTTCAA	TGCGE	84	45836637; 45803746, 51007142
			R - TTATAAACGAAAAGTTGCATGTTCAG
10	109	E22A4	F - GACCTTTATCTGGAACTGATTGAGTA	ASA	88	45830140, 45831370, 45838473, 45839882, 45840699, 45843772, 45843802, 45843959, 45844402; 51009529
			R - TAAGTATTGCTGGGTTATGTGGTATG
10	115	E12C3	F - TAACGAAAGATGAAGAAAAACAACTG	PE - AAAAGCCTTTCTTTTCCGTTTAAACACAGG (G/C)	86	45835325; 50994605
			R - CATAATTATTTGTAACCGTTGACGAC
10	117.5	E5G1	F - TTTGTTTACTAATCTTCATGTCTGCC	TGCGE	84	45818674; 45804158, 45807203
			R - CAGTGTATAAAACAGTTCCTCCAGAA
10	118.7	E26G8	F - AAGCATTCTCAAATGGAATACTGAC	PE - AATATTTGATTGCATTAGAATAATGAAAAT (A/G)	88	45831076, 45833737, 45835100, 45835862, 45838812, 45839005, 45840287, 45840645, 45841823, 45842517, 45843424, 45844362, 45844610; 45804896, 45806329, 45808421, 45813283, 45813402, 45813404, 45813687, 50995107, 50995647, 51000726, 51001060, 51007467
			R - CGTATAACATTCAAGGAACCATACAA
10	122.2	E17G11	F - ATAACGAACACATCTGTTTTTCTCAG	PE - CGCCCTGGATTTTGATGGAGCAGC (G/A)	89	45830788, 45835112; 51001303
			R - GATATACTCGGGCAGGTACTATATCAA
10	124.7	E12G5	F - CCTATTCCACTGCAAGAGTAGTTACA	PE - ATACACTATGGGTTCTGTAAGTCCCACTTC (C/T)	76	45818797, 45830134, 45837428, 45837839; 50994121, 50994443, 50995459
			R - TTTGAAAATATTTATTGTACAGGCCA
10	136.3	E9E8	F - AAGCATTCTTAAGTGAAAAGTTGGAG	TGCGE	86	45831076, 45833737, 45835100, 45835862, 45838812, 45839005, 45840287, 45840645, 45841823, 45842517, 45843424, 45844362, 45844610; 45804896, 45806329, 45808421, 45813283, 45813402, 45813404, 45813687, 50995107, 50995647, 51000726, 51001060, 51007467
			R - TTCTGGTACTAGTAGTTCTGCGTTTG
10	156.9	E21C6	F - AGAAGGAGAAAAGAAAGGATAAGGAC	TGCGE	88	45834213, 45835274, 45838783, 45842525; 50997692, 51000572, 51002337, 51005592
			R - GTCCAAAACCAAGTAAAGTTATCCAT
10	174.7	E7G1	F - AGACAAAAATAAGGGTTTTAAAGCAA	PE - TGCTTCTTCTTCTTCGTGTTTTTTTATCAA (T/G)	74	45835764; 45804788, 45809062, 45816988, 45821387
			R - AATGCAAAGAAATAAAGTACAGGGTT
10	191	E17A4	F - TTTTAAAGATTTATGCTCACAACGTC	PE - GACATTGATGCAACCCGCTGTGTTAAG (A/C)	86	45835656; 45806522, 45810139, 45810925, 45811086
			R - ATACTCCCACTCTTTCTACGAGGTTA
10	200.2	E20E4	F - CAAGTTGTAAAGTTCCCCATCTAATC	PE - AGGCGATGCTAAAATGTTTCAGGCTACA (A/C)	80	45819560, 45838332, 45838817, 45840386; 45805802, 45806022, 45809740, 45816180, 51004431, 51004673, 51005754, 51007151, 51007429
			R - ATTGTGTGGAGGTTATCAATTACTCA
10	222.9	E25A12	F - TTATTCCTTGTCTGAACTAAAGTTGG	TGCGE	90	45817463, 45833400
			R - TGAAAAATAAAGATGAAGGGGTTAAA
10	233.3	E17G7	F - CAAGTGGTCTTTGTTGTACTTGATTT	TGCGE	90	45829239, 45831398, 45833002, 45833599, 45835968, 45836232; 45814875, 51000826, 51004684
			R - GAGATTGCTCAGAAATTATTCTAGGG
11	10.3	GNAT2	F - ATGCACAACCCCGATACTACCAAC	ASA	86	3789977
			R - AGTCGGGCCCTTTAAATGAATACG
11	21.1	E21C7	F - TATCTGGTAACGGTGACTACATCAAT	PE - GCTCCATGGGAATTGCACAGATTCAACTA (G/C)	52	45833915, 45836166, 45839136
			R - ATCATTCAAGCAGTTTAAATATGCAG
11	41.8	E9C11	F - AACCTATTTTCTAACCTTTTGAAGCA	TGCGE	88	45829240, 45832872, 45836299, 45836622, 45839420, 45841182, 45841283, 45843067, 45844596; 15951594, 45804325, 45804448, 45806123, 45807528, 45809034, 45812498, 45813371, 45815912, 45816670, 50995290, 50998183, 51004380, 51004570, 51004576, 51009013
			R - AGTACATTTCATAGTTTGGCATGTGT
11	60.4	G2G21	F - TCCAAGAGGGTGTGAGGTGAAC	RD - Bsl I	47	15951154
			R - AAAGCCATGCGAAGCGGAAGAC
11	63	E11C3	F - GGTGTCACTGCTGAAAAAGAACT	PE - CGTGCGTGCTCTTTACATCAAGAGCA (C/G)	75	45817385, 45817798, 45817817, 45817824, 45818224, 45818227, 45818302, 45818691, 45818694, 45819160, 45819186, 45819432, 45829754; 15950908, 15951034, 45803512, 45803580, 45803621, 45804698, 45804742, 45804847, 45805496, 45806886, 45806923, 45807422, 45807665, 45808946, 45809142, 45810076, 45810218, 45810468, 45811082, 45811654, 45811690, 45812275, 45812617, 45812757, 45813106, 45813238, 45813725,…
			R - TTCATCACTGCAGGATTTAGTACAG
11	71.5	E20G11	F - TTGTTTATAAAATGAAACTGCAAACC	TGCGE	89	45839264; 45804666
			R - GGAAGACACTCCAGGATCATTAAATA
11	72.6	E17C3	F - CATTTTCCTCTTTACTCTCTGTGGAT	PE - ACCTGTCTTCGTCTTTACTATAATTGTTTG (T/A)	88	45833926; 51010211
			R - TGAAAAGACCAAATAAAACAAACAAA
11	72.6	E9C2	F - CAAGACAAGAGTTCTTTACCAATGAG	TGCGE	87	45828804, 45835849; 45809586, 45815068, 51005153
			R - ATTCAGTGCAAATGAAGAGTTAATTG
11	76.2	E9G1	F - TATTCCAGATATGATTTTAGGCTGTG	TGCGE	88	45817567, 45817626, 45818225, 45818404, 45818718, 45818720, 45818838; 45809613, 45810997, 45816316, 45816956, 45821890
			R - AATTACAGGGCAATAAACCATAAAAG
11	80	E15A9	F - CTCAAGTTATATGTCCAATGCAGAGT	TGCGE	81	45830985, 45837920; 45807480
			R - AATTTCACAGAATTTATGGCATATCA
11	94.3	E19E12	F - ACATGAATGAAAAGATTAAGGGAAAC	PE - ACCTGCATCATTGTCTCTACTATAACTAAC (T/C)	89	45828520, 45829381, 45831004; 45807366, 51000367, 51001632
			R - TAGGTAAATGGAATGTGGATACTGAA
11	95.5	E13G8	F - ATGTACACTTCATTAGAACTTGTGCC	TGCGE	89	45836134; 45803572, 51008968
			R - TGTGGAAATAAAGCAGGAAGTATATG
11	107.8	E25E5	F - AGGTGAGGCATTACCTGACTGAG	PE - GGTGAAGAAGATGTGAGTGCTGTAACGAA (A/G)	85	45829003
			R - ACACCAACCAGATCCCATTC
11	112.6	E17E11	F - CAAATCAGAATGCTTGGAATAGTACC	PE - TGTGGCGTGGACAAATACTACTACATTGT (C/G)	90	45806428, 45806833, 45813751; 45827984, 45830222, 45831247, 45832335, 45834301, 45834653, 45835603, 45836914, 45839046, 45841324
			R - TAGTACAGACCATTTTTGCAGTTTTC
11	122.8	E10A2	F - TAGCAACGTCTCCTCCTCTGG	PE - AAGCTGTGGTGAGTCCACGATATTGAT (G/A)	86	45832141; 51004837
			R - TAAATTGTCATTCGTCCTCAAGTAAA
11	122.8	E15G4	F - AGATTCTTGGCTAAATCTGAAGGTTA	TGCGE	90	45831896; 51008063
			R - CTCACTACAACCTCAAGATGACAGAT
11	132.9	E15E10	F - TGAACATTAAGGTTATGTGTTGTGTG	PE - ATACCTATATAGGAACGATCTTTCACCGGC (A/G)	65	45830640, 45841522; 51000435, 51000477
			R - CAGTAGGAACAAGAAACATCAGAAGA
11	136	E6E11	F - AAGAGAAGTTCCTAGATGAGTTGGAG	PE - TCATGTTTTGCTCTGCTGTGCAGT (G/A)	90	45818124; 45814747, 51003553
			R - TGAAGAGAGAACTCAAAGTGTCTGAT
11	137.2	E13E9	F - GGAGAACACTGAAGTGAAAATAACAA	PE - AGTTGAGAACATGAGTGTTCAAGTTCACTA (A/G)	87	45833585; 51001992
			R - GCATGTACCACTACTGATCTGAAACT
11	137.2	G2H18	F - TTGTCAAATGGGCGAGTTCA	RD - Tsp509 I	84	15951165, 51009268
			R - TGTTTTGCACCCAGTTTTTG
11	139.7	E11C5	F - GTCACAGAAACTGGTACATCCAATC	PE - GACTGGCTCTCCAACCAGCTGAAAA (A/G)	82	45830552, 45833436, 45835773, 45837009, 45838224, 45838308, 45838597, 45838808, 45839767, 45840389, 45841257, 45841931, 45843378, 45843990, 45844169, 45844249, 45844620; 50995951, 51000239, 51004692, 51008546, 51010009
			R - CTACTGTTCCTGCCGAGATGAT
11	145.7	Col1A	F - CACCGAAGCCTCCCAAAACATCAC	RD - Eae I	83	45832866, 45837399, 45837421, 45837767, 45837923, 45838909, 45839147, 45841311, 45844254; 15950978, 15951101, 15951166, 15951168, 15951268, 15951298, 15951329, 15951417, 45803638, 45803717, 45803765, 45803887, 45804252, 45804844, 45805608, 45806150, 45808598, 45809251, 45809339, 45809651, 45812028, 45812763, 45813497, 45814513, 45814950, 45815560, 45816460, 45817254, 51003531, 51004096, 51004549,…
			R - GAGCCCTTCCATCTTAGTCGT
11	149.6	Dlx3	F - GGCGAGGCGCACCTCTCCAACTGGTGA	RD - Dpn II	89	28200445; 1399860
			R - AGGCTCCCACCTTCTGAGTTGGGAAGG
11	162.4	G1L11	F - AAAGTGACCATCCAGTGCCCAAACCT	RD - Alu I	91	45831627, 45832812, 45835455, 45837079, 45838120, 45838138, 45838545, 45841571, 45844250; 15951030, 50995334, 50998224, 51000625, 51004333, 51005363, 51005423, 51006514
			R - CCGGCCGAAACTGACGAGATACATTAG
11	167.1	E18A9	F - AGTCGTCGACGGCAAAGTG	PE - GTCTTCTTAATATTTCTGTTCAACCTCTTC (G/A)	86	45833364, 45837296, 45837393, 45839295, 45839305, 45840047, 45840584, 45840794, 45842060, 45842067, 45843215, 45843951, 45844754; 45803466, 45803784, 45804006, 45804200, 45804238, 45804263, 45804292, 45804298, 45804474, 45804711, 45805161, 45805283, 45805287, 45805368, 45805732, 45805819, 45805967, 45805975, 45806085, 45806175, 45806248, 45806443, 45806775, 45806805, 45807444, 45807532, 45807647,…
			R - TTTGTTCAGTTTTCAACATTTTCTTC
11	168.2	E10C4	F - CTCCACTATTTAAAGGACATGCTACA	PE - TGCTACATTAATGTAATAAACGGCATCATC (T/A)	90	45817789, 45828985; 45805410, 45808016, 45808226, 45812394, 45812774
			R - TTAATATAGCACAACATTGCCTCATT
11	168.2	Krt17	F - GAACTTGTTGGCAGGTTTCTCTT	RD - Aci I	74	45836932, 45838404, 45838413, 45838751, 45838848, 45839575, 45839597, 45839866, 45840129, 45840212, 45840230, 45840300, 45840930, 45841327, 45841681, 45841787, 45842064, 45842527, 45842560, 45843061, 45843154, 45843169, 45843659, 45843929, 45844173, 45844207, 45844454, 45845020; 45803827, 45804672, 45804713, 45805267, 45805937, 45806678, 45806738, 45807729, 45808079, 45808140, 45808267, 45808407,…
			R - CTAGTGATAGGTTGGACATACCAGAG
11	168.2	Krt24	F - CCTAGAACATTACCAAAACAGACTCA	RD - Dpn II	90	45833674, 45834314, 45835073, 45836513, 45840631; 45803419, 45803601, 45804654, 45808036, 45813679, 45816579, 45816816, 45816896, 45821798, 51003366, 51004112, 51008551, 51010017, 51010221, 51010451, 51010839
			R - AATGAAGAAGTATTGCATGTGAGAAC
11	168.2	ETG1506	F - AGGATATCCGCTCAGAAATATGAAG	RD - Fnu4H I	71	45837108; 51007874, 51008074
			R - CTGACCACTTGCAAAACTTACTACCT
11	171.1	E13A8	F - CAATTTATAAGCAATCTGAAGTGGAA	TGCGE	87	45828595; 45808779, 45808976, 45811966, 51002288, 51002685, 51006647
			R - AATTTAGACAACAAATAAGGGTTTGG
11	176.9	E9A10	F - TGATAGTTTCTGGATTAAGACGAGTG	PE - GTGATCTAGTGGGATCAAACCCTAAAGACC (C/T)	91	45831602, 45842550, 45845385; 51003174, 51006724
			R - CTTAGAGCCATTGTTACAAGATGTTC
11	178	Hoxb13	F - GTCTCCTTTTGCTTGATTTCCG	RD - Nsi I	91	11037553, 51005599
			R - TCACCAAAATCACAGAACACCTGC
11	180.2	E22G4	F - ATGAGAACGGTCAGCCCTACT	PE - AGTAATAAATTATAGATCTGCCTCATCAAC (A/G)	91	45835856
			R - AGTAGAGGGAATGCCATATGAAAAG
11	190.4	E6E7	F - GGATAGATACCATGAATCCATTGAG	PE - GAGCTGTGTCTCACTGCAGATTCG (A/T)	90	45833727; 50994644
			R - GTTGGTGCACTACCTGGAGTAAG
11	192.8	G2G13	F - GGGAGGGGAGAAGGCTACCA	RD - Mnl I	83	15951146
			R - ATACACGGCTTCCATGCTTCTTCTT
11	194	THRAP4	F - AGTGTATACCATCCTCTAAGCCTGATTT	PE - CTCCCCTCGATGGGTGGTGTAGG (A/G)	91	71119462
			R - CTCTGATCTCACATATGTAAAAAGGAAA
11	203.4	Thra	F - TCCTGACAGTGAGACGCTG	SSCP	91	33413867, 34014907
			R - TAGGGCCACTTCGGTGTCATC
11	218.5	Rpl19	F - GTCTCATTATCCGCAAACCTGT	SP	91	45817711, 45818475, 45818795, 45819466, 45820010; 15950834, 15951042, 15951251, 15951669, 45803428, 45803712, 45805479, 45805984, 45806073, 45806530, 45806659, 45807171, 45807715, 45808048, 45808328, 45809160, 45812094, 45814332, 45814441, 45815047, 45816217, 45816415, 45816696, 45817163, 45821038, 45821963
			R - ATTCTCATCCTCCTCATCCACGAC
11	-	tcell	F - GTTACACCGGGATCTTTCTCACTCT	RD - BsuR I	77	1255251
			R - CAACAGCAAGCAAACAAACAGGAC
12	0	E5A9	F - TTGTAACCTACATTCCTAATGAACACA	PE - ATGATGGTTGGCGGGTGAGAGTAGA (T/C)	88	45805735, 45806054, 45806418, 45811371
			R - AGAGTTGCCACTAGCACCGTAGAAC
12	8.7	E9E4	F - GAAGATGCTTATGACATGAGGAAAG	TGCGE	73	45817376, 45818716, 45831945; 51008105
			R - AAACGTTTTTCATCTGAAATGTTAGG
12	42.8	E6G1	F - GATCGTCAGTGGAAATACATAATCTG	TGCGE	87	45830794, 45832005; 45803768, 45807192, 45814329
			R - TGTAAGCTTTTGAAAAAGGGAAGTTA
12	51.2	E12E3	F - GACTGAGGATCATTTGTTTGTTAATG	TGCGE	86	45828321; 45816529
			R - GACTTCAGTTTCAAAGTACGTATCCA
12	95.3	E14A6	F - AAAATTGTTCAAGTTAAACTGCTGTG	PE - GTAGTACAAAAACATCTACAATCAACTGAA (A/T)	85	45831858, 45833017, 45836010, 45840764, 45842036; 45805817, 45808380, 45810363, 45811578, 45812230, 45812796, 45816251, 50994150, 50994222, 50994413, 50997836, 50999344, 51000200, 51001525, 51006114, 51006356, 51006492, 51006533, 51007733, 51007861, 51009739
			R - AAATTATTCAGTGCAGATGCAAATAG
12	117	E11E8	F - AGCCTATGAAGACTCAAGCTCCT	TGCGE	89	45817346, 45817911, 45818009, 45818121, 45818632, 45818849, 45819015, 45819198, 45832772, 45833253; 15951250, 45805200, 45805369, 45805500, 45806027, 45806067, 45806135, 45806520, 45806586, 45806783, 45806862, 45808818, 45809212, 45809267, 45809703, 45810003, 45810364, 45810766, 45810866, 45811888, 45812728, 45813223, 45814057, 45816177, 45816646, 45820978, 45821012
			R - GCCCAGCAACTGTTTTATTTACTGT
12	130.6	E5A5	F - CTTACAGGACATCGACCATAGAGAT	PE - TTCTGCATTGAGGCCATGTCATGCT (A/C)	84	71119456
			R - CCTAGGGAACAACAGAGAAGGAAGG
12	202.3	E12G3	F - TAAATACAGAATGTGTTCGACTGTCC	PE - AATAAATACAGAATGTGTTCGACTGTCCTC (A/C)	87	45830872; 45817056
			R - GAGTGCATTACATGGTATACTGCTG
12	211.4	E7E3	F - GTACACAATTAAACAGAAGCTTGACC	PE - GGTAAGATGATTTTTACCACGCTGGC (G/A)	69	45829057; 51001323
			R - ATGTGAATGTCACTCTTGATGAGGT
13	26.2	E10C8	F - CTTCACCAACAAAGTTAAGCACATCT	PE - TCTTTCAGCCAGGACTACAACTTGTAACAA (T/C)	89	45830032, 45836057; 51008034
			R - AAATTAACCCTGAATAGTGCCATC
13	64.2	E20E3	F - GCCAGCATTTTAACTACTGATACAAA	PE - GCACTGCTTTGGGAGATGTTTTCTGTCT (C/G)	86	45836318, 45837763, 45837778; 45812357
			R - GTTATTGCTTTATTCAAACCCAAAGT
13	74.1	E8G8	F - CAAGGTTTTTGAAACATGCTCTT	PE - GGTTTTTGAAACATGCTCTTGGTGAGCC (T/A)	87	45818094, 45818264, 45828240, 45832652, 45834802, 45835005, 45836683, 45836693, 45837625, 45841562; 45805125, 45809830, 51004886, 51005340
			R - ACTAGGTTAGAGAAAAACTAGCGCAC
13	78.8	E23A2	F - CGGCTAAGCTGGACAAAGG	TGCGE	90	45818094, 45818264, 45828240, 45832652, 45834802, 45835005, 45836683, 45836693, 45837625, 45841562; 45805125, 45809830, 51004886, 51005340
			R - CAAAATGGCAATTGCAAAAA
13	120.3	E24E1	F - CTGTAGACCACTGCTCCAGAATAC	PE - AGATCCCATTAGCACAATCCTCTTTTTAGC (C/G)	58	45830329; 45806561, 45810601
			R - AAATTGGTGTTCCTTTTGACTTCTT
13	138	E13A6	F - TGTTTAGGTATTCTATGCCACTCTTG	TGCGE	85	45834551; 45808069, 45821746, 50995948, 51002655, 51009050, 51010392
			R - ATCTCTAACCTTAAGTGCAAACCAGT
13	155.6	E24A5	F - AAGGCCTTATTTTATTGAAACAGAGA	TGCGE	89	45831223, 45831600, 45837772, 45840549, 45840885, 45841827, 45842375, 45844277, 45844961
			R - TATCAGATCCTAGACAGCGATATTGT
14	0	E7A5	F - CCTCTGTTGGTTAAAGTCTAGTGACC	PE - CAATCAGAATGCAACCAGTACAACAGAC (C/A)	89	45831611; 51006916
			R - GTGATATTCCTCTAAAGGGTCCATAA
14	31.3	E20E5	F - GTTGTTATCACAAACTAGAGCGGTTA	PE - CATTCTTTTAAATTGTTTCTCCTCAAGGTC (C/A)	89	45835925, 45836357, 45843289, 45845286; 50997190, 51004014, 51006712, 51007461, 51008592
			R - ATTGTACATCGTACTATGGTGGTCTC
14	31.3	E26A9	F - CACGAGACCATATATTCTTTATTGGA	PE - TGTTATTGCTTCCAGGTATTGAGCATGAGG (C/G)	88	45832550; 51009888, 51010496
			R - TGATTTGTGAAGTAGAATGTGATGAA
14	31.3	E7E9	F - TTCATCACATTCTACTTCACAAATCA	PE - GGCAGGCAATGTAGCATTGAAACTTAA (G/A)	87	45832550; 51009888, 51010496
			R - CTAGGCAAGCAAGCTTTCTAATAGTT
14	31.3	ETG926	F - TTCATCACATTCTACTTCACAAATCA	PE - TCCTATGAATTTCCTCTGATAAGGATTAGC (G/T)	73	45832550; 51009888, 51010496
			R - CTAGGCAAGCAAGCTTTCTAATAGTT
14	31.3	ctg1459	F - ATAACAAGGACATGTTCTGCTGG	RD - Aci I	79	45835925, 45836357, 45845286; 50997190, 51004014, 51006712, 51007461, 51008592
			R - CTAGCAGAACCCTGTATAGCCTG
14	32.6	ctg1381	F - GTCACAGGTATAACATTGAAAGGATG	RD - Dpn II	85	45832424, 45835762, 45844639; 50995280, 50999641, 51002754, 51003819
			R - TAAATGAATCAAACATTGAAGAGAGC
14	98	E17A7	F - AGACGTGGGACTTCTAATGGTACT	PE - CACCACTCCTACCAGCCAAAGAGTG (C/A)	87	45833698; 45807329, 45807378, 51007571
			R - ATAGGGAAATATCCTATCAAGGCAG
14	105	E12C11	F - CCAGCTGTTAAAGTAAAGAAGGAAGT	PE - CATTCACAAATTGATGAAATCTCTAAAAAG (C/T)	90	45831905; 51010740
			R - GTTTTAAAAATTTCATAAGGCAGCTC
UN	-	E15A5	F - CCATAGCATACTTTCAAGATCACACT	ASA	81	45829901, 45843956; 50997573
			R - TATCAAGAGTTAGGAAGAGTGCTTGA
UN	-	E16A2	F - GGAAACAACTGTCTGATTGGATACTA	ASA	89	45829888, 45831020, 45836931, 45843708; 50999596
			R - GAAATATAATTGACCATCCTCCTGAT
UN	-	E5G2	F - ATTAAATCATGCAGGCTATTTAACAC	ASA	89	45817533, 45818577, 45818608, 45818817, 45836544, 45837194, 45837416, 45837700, 45838057, 45838348, 45838916, 45838957, 45839163, 45839275, 45839707, 45840578, 45840780, 45841305, 45841400, 45842247, 45842580, 45842925, 45842999, 45843020, 45843188, 45843307, 45843566, 45843599, 45843638, 45844012, 45844017, 45844915; 15951448, 45803817, 45804752, 45805612, 45806352, 45807404, 45808379, 45808503,…
			R - GCATTCTTTTAATCTCAATGAACAAA
UN	-	E6E6	F - GAAAACCTGCTCAGCATTAGTGT	ASA	87	45819618; 45803391, 45803439, 45803690, 45803698, 45804296, 45804391, 45804592, 45804594, 45804697, 45805852, 45806192, 45806914, 45807087, 45807318, 45807724, 45809014, 45809317, 45809505, 45810575, 45810645, 45811120, 45812403, 45812596, 45813929, 45813930, 45813934, 45814643, 45816110, 45820528, 45821120, 45821614
			R - TCTATTACCATAGCATTAATTGGCAG
UN	-	E15G2	F - ATAACTAAAGGTAAGACCTGGGAAGG	SP	91	45832247; 50997077
			R - AATGCCTTAAATAGCCTCTTGTACTC
UN	-	E7E2	F - GTTGAGCCCAAAGATGAGATTC	SP	79	45817904, 45842794; 15950977, 15951222, 15951433, 1836059, 45803925, 45803990, 45804023, 45804981, 45804983, 45805052, 45805090, 45805217, 45805218, 45805269, 45805272, 45805397, 45805413, 45805468, 45806298, 45806848, 45807379, 45807453, 45807586, 45807629, 45807705, 45808483, 45809157, 45809241, 45810168, 45810407, 45811251, 45811526, 45811688, 45812141, 45813210, 45813431, 45813684, 45813809, …
			R - TTTTACAGATCCGTGTTCCAAGT
UN	-	G1D7	F - CAGCGGTGGAAATGACAAACAGG	SP	85	45831801, 45833362, 45836957, 45839180, 45841396, 45842269; 15950929, 45803838, 45804274, 45806272, 45816685, 50993625, 50993743, 50993750, 50994221, 50994266, 50994561, 50994600, 50994838, 50994914, 50995209, 50995936, 50996172, 50996392, 50996986, 50997020, 50997027, 50997103, 50997463, 50997697, 50997998, 50998140, 50998725, 50999188, 50999623, 51000905, 51000961, 51001576, 51001795, 51001889,…
			R - CCAAGACGACGAGGAACGGTATT
UN	-	E10A10	F - CTATCCTCGGTGGAATGGTTATC	PE - ATGAGGGCCCCATAGGAAGTATTCATATT (T/G)	90	45817455, 45817517, 45817826, 45818774; 45804877, 45804932, 45805907, 45811232, 45811233, 45811540, 45812647, 45812938, 45815538, 45820859
			R - TGATTTAATAGAAGTACAGGGGTTCC
UN	-	E10G9	F - AAAATGTGTGCGAGACAGGAT	PE - AACAATCTTCTGCTCTTCAATCAGGAAAGC (A/G)	80	45819236, 45832753; 45803442, 45803643, 45804270, 45804837, 45804934, 45806456, 45806457, 45807104, 45807239, 45807311, 45811060, 45811585, 45812068, 45813737, 45813738, 45813903, 45813967, 45814099, 45814768, 45815482, 45816360, 45816716, 45821222
			R - CGATTCACTTATTTATTTTCATCCG
UN	-	E11G9	F - GTGTAAGACGTCAGACTTGTTGTTCT	PE - TTTTTCAACATAGCTGGTTTTTCACCCTGT (C/T)	82	45833210; 45808957
			R - CATGCAGCTATTTAGTGTTACAGACA
UN	-	E12A2	F - GAGAAATTCCTAAATCAGCACTTACC	PE - GCCAGTATAATCAATGGTGAGGGATCGC (A/G)	87	45831668, 45836681; 51001010
			R - TCTTAAATTATGAGTTGCTATGGTGG
UN	-	E13G6	F - CTATAACCTAACCCCTGCAATTAAAA	PE - GGTTATGGCTGCATGTAAGCTTCTAACAC (A/C)	88	45830147, 45833960; 45805853, 45806394, 50993877, 50994614, 51000549
			R - AAAACCTGCAAGTTAATAGAAACACC
UN	-	E14E11	F - AGAAAGTTACATTCACTGATCCCTCT	PE - TGGAAAGTGTTCGATCCAGATCCCAGT (C/T)	83	45833425, 45838895; 51005093, 51005751
			R - AAGTGTATTCACAGTGATCTTCTTGG
UN	-	E15G1	F - CGTAAAACATTCTCAGCACACTTTAT	PE - AAATGATGCTCCAGTGAGAATAATTGAAA (T/G)	85	45833156, 45833686, 45840940; 45811563
			R - TCCTCTGTTCAACTACTGTGAATACC
UN	-	E18E2	F - TGCTTACAGTTTGAATACAATGAACA	PE - AACCCAGTAGAATAGAAATTACTTATGTAT (A/T)	85	45833651, 45835206, 45835346; 51003434, 51003664, 51005040, 51005072, 51006156, 51007091, 51007347, 51008337, 51010871
			R - GATCGTAAAAGGATGTTAACGAATTT
UN	-	E18G12	F - AGACAAAGAGGAGCTTCCAGTATTAG	PE - ATTTAGCAAATGTGGTTTGACCCCACG (T/C)	88	45839495; 51006617
			R - CTAGTTGTCAATACAATCCACAGGAA
UN	-	E19C11	F - ATAAATTGTCTTGAGGTAATGTGGTG	PE - CTGCATCTCAGACAGACCCAGCC (A/C)	85	45817533, 45818577, 45818608, 45818817, 45836544, 45837194, 45837416, 45837700, 45838057, 45838348, 45838916, 45838957, 45839163, 45839275, 45839707, 45840578, 45840780, 45841305, 45841400, 45842247, 45842580, 45842925, 45842999, 45843020, 45843188, 45843307, 45843566, 45843599, 45843638, 45844012, 45844017, 45844915; 15951448, 45803817, 45804752, 45805612, 45806352, 45807404, 45808379, 45808503,…
			R - GCATTCTTTTAATCTCAATGAACAAA
UN	-	E19G4	F - AGTACTGTTAAATGCCAAAACAAGTG	PE - GCTAGCTTTATAACAGCAAGTGGAACGT (G/C)	86	45832307; 45806878, 45809108, 45811751, 45812799, 45813804, 51004602
			R - CTTGCAAAGTAAATGTTGACCTAAAA
UN	-	E22C9	F - AGGTCTTCGAGACGGCCAC	PE - CAGCCTCCTTTGGGCTCTTTAGTCTTTT (C/G)	88	45830035, 45830733, 45831940, 45834768, 45836566, 45845127; 45809024, 50997016, 50998976, 51001385, 51004745
			R - GCTCGTAGTCTGTCCTGGGTA
UN	-	E23C11	F - CTATGACCTGGGAGAACGTAAAC	PE - GACCATGGAACTTTTTTAAATAAAGCTTTT (A/G)	86	45828028, 45830368, 45835910, 45842629; 15951620, 45807514, 45810117, 51008345, 51008634, 51008921
			R - TGTTTCAAAGGAATACATGAAAAAGT
UN	-	E24E2	F - GAGCGTACAGTAGCAGAAACTATAGAAA	PE - CCACTTTTTACTTAAGAAAAACATGGGAGT (A/C)	87	45829278; 51009960
			R - CTTCTCCCAAAGTCTGAACAAAG
UN	-	E25C11	F - ACGTGATTTTGCTTAATAGTAGGGTT	PE - TTACAAATGTATTCAGGTAATTGGCAGAAT (G/T)	87	45831742
			R - AAACATTGTAGTTCTTCAAAGATTGTT
UN	-	E26E1	F - AAGCTACTGTTCAGAGAAGGAGTCAC	PE - ACCACACAGTCTAGTGACCCTTGAAGA (G/A)	91	45829130
			R - TAAAGCCACAATAACAATCCATAAGA
UN	-	E26E7	F - GTAGCCCAACCCATCAACATAG	PE - ATGAAGGACATGGACAATGAATGTTTCCAC (G/A)	88	45833517
			R - AGCACTTAACCACAATTCAGTTTATT
UN	-	E5C11	F - GCAAAATATTTCTAATCAGATGTGTCA	PE - CTTCCAGTGATGGCGCACCACT (G/A)	83	51010644
			R - GAAACGGATTTATAATGCTAAAAGTCA
UN	-	E5C4	F - GCTGTGAGACGAAGAAGATGACTGT	PE - GCTACCTCAGCCTGGCCAAGATGAA (A/G)	88	71119458
			R - AGTCGTAGTAGGGGATGAAGAAGTC
UN	-	E5E10	F - CCACTGTCCTCAGTCAATCTATTTTA	PE - CCCATAAAACAGTGGCTTAATTTTACCTAG (C/G)	85	45817363, 45818178, 45818385, 45818730, 45828032, 45830710, 45831755, 45834740, 45843989; 15951530, 45809617, 45811995, 50993516, 50996904, 50997022, 51001733, 51007805, 51007992, 51008746
			R - GTCAACGTGCATAGAAGACAGTTAAT
UN	-	E5E12	F - ACTGTAGAAGTCAGAAGACGTGAAGA	PE - GCGCACATGTTACATTCCTAGGACC (A/C)	91	45836342; 45811030
			R - AAAGGTTATATTTTTAGGAGGCCATT
UN	-	E5G8	F - AACACTCATGAGAACCTCACATACAT	PE - GGAAATGTGCTTCATCCAAATATATGTTGC (G/A)	88	45834638, 45844048; 45805801
			R - CTTCATTTTTGCAGTCTTTATTTCTG
UN	-	E8E8	F - TAATTGGGTGTGTAAAACATTACGAG	PE - AATCTGACCAAGAAAAGCAAAAACATGAAT (A/G)	90	45829245, 45829312; 50996671
			R - CAGTACAAAAGAAAAGAATGTCATGG
UN	-	ctg1717	F - GAACTTGTTGGCAGGTTTCTCTT	RD - Aci I	60	45836790, 45840605, 45840872, 45842243, 45842493, 45843214; 45814695, 51003826, 51003908, 51003920, 51004093, 51004344, 51004753, 51007967, 51009535, 51010601
			R - CTAGTGATAGGTTGGACATACCAGAG
UN	-	nt010be09	F - GAAGAGGTCCTAAAATATCAAGATGC	RD - Aci I	89	51006669
			R - ATGATAGACTTCGTCCTTGTCATAGA
UN	-	v3p1c11	F - CACAAAAATAGACAGACTGATGGAAG	RD - Aci I	90	45819510
			R - CAGTTCACAGCTTACTGTAATTAAAAA
UN	-	G1I19	F - ACCCAGACCTGTCCACCTCA	RD - ApaL I	87	45835890, 45838221, 45838259, 45838305, 45838549, 45838691, 45838861, 45838923, 45839571, 45840124, 45840167, 45840673, 45840928, 45841706, 45842488, 45842674, 45842740, 45843119, 45843268, 45843778, 45843846, 45844147, 45844255, 45844302, 45844374, 45844579, 45845305, 45845493; 15951195, 45803825, 45805638, 45805737, 45805770, 45807498, 45808064, 45810511, 45810551, 45810806, 45811584, 45811909,…
			R - GAACAGCTCTCCAATCCACAAG
UN	-	G1M19	F - GAGAAGTAGTGTCCCGGCAGAAAC	RD - Tsp509 I	58	15951052
			R - ATGGGTGAAAACTTAGGTGAAATG
UN	-	E10A9	F - TTCTTTGATGAGAATGGAACATTAGT	TGCGE	87	45828414, 45832456, 45833100, 45834031, 45835371, 45835755, 45836480; 45817181, 45821665, 50999469, 51002162
			R - AGGCATGAACATTCTTCTTTATTGTA
UN	-	E10E7	F - ACCACTATGAAGACGTTAAAGATCG	TGCGE	87	45817968, 45818044; 15951109, 45813574, 45817230, 45821515, 50997257, 51004115
			R - AGTGTGACTAAAATGGACCCAGATAC
UN	-	E11E2	F - ATTGAGACTTCTGCCAAAACTAGAC	TGCGE	58	45829185, 45831180, 45831306, 45832630, 45832730, 45840927, 45842657, 45844303, 45845101; 15951300, 45804037, 51006587, 51008667
			R - ATATGGCTCATAGGATGACACACTT
UN	-	E12A10	F - GATACATCTTTGACTCGCATACACTT	TGCGE	61	45831158, 45836786, 45836800, 45836983, 45837081, 45837815, 45838092, 45838211, 45838503, 45838984, 45838997, 45839306, 45839534, 45839574, 45839781, 45840086, 45840289, 45840621, 45840949, 45841031, 45841332, 45841386, 45841387, 45841409, 45841627, 45841983, 45842164, 45842203, 45842308, 45842435, 45842647, 45842728, 45842862, 45843492, 45843636, 45843781, 45843965, 45844113, 45844122, 45844527,…
			R - CTAACTTAAGAAACCCCAACTTCTTG
UN	-	E12C12	F - GCGTATCACACATACAAGTCACCTAT	TGCGE	87	45817943, 45828101, 45833269; 51005749
			R - ACTACGTATGTTGTACCGTCTCTGAC
UN	-	E13A12	F - GTAGAACTTTTTGAGCCTTTTTGTTC	TGCGE	87	45829315; 50995797, 51000023
			R - GCAGAGGTGTTTACAAACAGAAGATA
UN	-	E13C5	F - TTTTATTTCCTGAGTTTTTGTTGTTG	TGCGE	88	45834090, 45835540; 45803786, 45808002, 51006061
			R - AAGTCGATTGGCAAATATAATAAAGG
UN	-	E13C9	F - AGGTATTTTAGAGAATGGATTTGTGG	TGCGE	84	45834453; 45803474, 51010024
			R - CCTTTAATGCCAATTGAAGTTTTTAT
UN	-	E13E10	F - GACTCTGTGCTCTTAATCCAATCTCT	TGCGE	90	45829280, 45833819, 45843664; 15951265, 45812520, 51004486, 51005108, 51009732
			R - ATGATCAGCAATCTCCTGTATCTATG
UN	-	E13G3	F - AACACTTTGTGACTCTAAGCATTGTC	TGCGE	88	45830094; 45813129, 50997079
			R - ATATTTGTGTAGCACTGTACCTGAGC
UN	-	E13G9	F - TTATGCCTTATTTCACACTCTTTCTG	TGCGE	77	45829410, 45834258; 51007447
			R - CAAAACCAACAGGATTTAAGAAAATA
UN	-	E14G4	F - AGCTGGAATATTAACCATCAAGAATC	TGCGE	90	45828585, 45831961, 45833624, 45834327, 45836330, 45838589, 45840155, 45840891, 45843291, 45845186; 15951701, 45804597, 50993640, 50995147, 50996486, 51000170, 51003263, 51003975, 51004981, 51005266, 51009676, 51010257
			R - TGTGTGCAAAAGATGATAACTTGTAA
UN	-	E15A3	F - TAATGGTGAACCTAGTTAATCTGCTG	TGCGE	88	45817429, 45817440, 45831655, 45836678, 45837985, 45839514, 45841107, 45843217, 45843368, 45843843; 45808469, 51006313, 51007349
			R - TACTGTCATATTTTCCAAAAGCTCTG
UN	-	E15C10	F - AGCAATACTTTCTACAGGAAACCAAT	TGCGE	91	45836008; 50997807, 50999347, 51008144
			R - GTCAGTTTCATTAGTACCCGTTTCTT
UN	-	E15C2	F - GTCAAGTTATTTTTGTACGTGTTTGC	TGCGE	84	45827972, 45841208; 45804955, 45805317
			R - ACTTTCATAGTGCAATCACCTTAGTG
UN	-	E15G3	F - ATGTTTACTGGTATTAGACTCAGCCC	TGCGE	90	45831564; 51001442
			R - CTTAATGAAATGTGATGCTTGATTTC
UN	-	E16C4	F - ATATGATCTTTTAAGGGTCAAACAGC	TGCGE	90	45818574, 45828276, 45833106, 45836470, 45836958, 45839396, 45839486, 45841097, 45841306, 45841959, 45842596, 45842956, 45843518, 45844732; 15950850, 15951593, 45805649, 45809229, 45810482, 45821653, 51002649, 51003454, 51003843, 51005746, 51005978, 51006118, 51006303, 51006756, 51007053, 51008205, 51008500, 51008816
			R - TCCATTAAATAATTTGACAATCAGGA
UN	-	E18A1	F - TGCCTAATAAACTCACTTCTACCCTT	TGCGE	31	45817792, 45819101, 45819265, 45830087, 45830532, 45832948, 45839352, 45840034, 45841804, 45843091, 45843641; 1871355, 1871357, 45803554, 45804062, 45804449, 45806515, 45806571, 45806645, 45806705, 45806847, 45807003, 45807066, 45807852, 45808616, 45809093, 45809151, 45809472, 45809557, 45809588, 45809716, 45810307, 45810891, 45811014, 45811048, 45811330, 45811564, 45811911, 45812066, 45812663, 4…
			R - TCTAATTCACAGAAGACAATTTCAGG
UN	-	E19A1	F - AGTACCTGTTTGACAAGCACACC	TGCGE	92	45818189, 45819108, 45819816, 45820152, 45828890, 45830354, 45832316, 45832414, 45832614, 45832618, 45833602, 45837662, 45837770, 45840803, 45841676, 45842837, 45843397; 15950968, 15951142, 15951239, 15951410, 15951515, 15951516, 15951562, 15951646, 15951702, 45803613, 45803699, 45803705, 45804055, 45804224, 45804236, 45804544, 45804758, 45804766, 45804850, 45804899, 45805085, 45805088, 45805126,…
			R - ATGCTGAAAACCTTTATTCATTTCTT
UN	-	E20A7	F - ATCAAGGCTTACATGGAGAGTGAT	TGCGE	91	45828303, 45829671, 45829906, 45830083, 45830417, 45833495, 45838763, 45841977, 45843873; 45804856, 45805969, 45806297, 45807497, 45807850, 45811726, 45815287, 45815637, 45816920
			R - GAAAATATACAAAAGTCAATGGGGTT
UN	-	E20G9	F - AGTGATGAGCTCTGATAAGAACGAG	TGCGE	88	45818214; 50994739, 50997117, 51004353
			R - ATGTAACATAACAGCAGAAGGTGTTC
UN	-	E22A10	F - GATGTGGAGCTTTATGGACAGTATCT	TGCGE	87	45833296; 45808024
			R - GGTAAAACATGCATTCGTTTTCTAAT
UN	-	E22E1	F - AAAAGTTTAAAATGCACCTTACCAAG	TGCGE	82	45819438
			R - CAGTATCGATTTGCCTTTACTGGT
UN	-	E22G9	F - GTGAACTAAACTGCCCCCTATGT	TGCGE	91	45836292
			R - ATTAGTGGCTGTTGAGTGGGTT
UN	-	E23A5	F - ACGACTGCTATAGACACTGAAAACAT	TGCGE	90	45832655
			R - CATCTGTTTGGACGAACTATTTTAGA
UN	-	E26C4	F - GAGAGTCTTCCATTCCATCTCCTAC	TGCGE	92	45832085, 45835194, 45837017, 45837654, 45842209, 45842304, 45842318, 45844269, 45844491, 45845056; 45808722, 45810192, 51003878, 51005479
			R - ACGTTAGGAATCATTAAGTGGCAT
UN	-	E26C9	F - AAAACAAGGAGAAGAAGCTCCAC	TGCGE	91	45817813, 45817905
			R - ACTCAAGTGAGACACGAAGAAAATAA
UN	-	E6C4	F - TCTTTCGGTTTATAACTATGATGCTG	TGCGE	89	45829378; 45809385, 51007750, 51009596
			R - ACATATCCTGCATGAATCCTAACATA
UN	-	E6G11	F - GAAGAATCCTTCTCTGCTCCTTTC	TGCGE	83	45829157, 45830859, 45839909; 51008300
			R - TTTAAAAGTTGTGGAAGTGATCCATA
UN	-	E7A9	F - CTGTACGAGAAGAAAAAGACCTCC	TGCGE	87	45817384; 45803703, 45804430, 45804836, 45807226, 45807853, 45808396, 45808831, 45808979, 45811063, 45812946, 45814236, 45814373, 45814387, 45816002, 45816077, 45816232, 45816377, 45816793, 45820635, 45821530, 45821843
			R - TTTTATTAGACTAAATCCAGCAGCG
UN	-	E7E11	F - GATGAAGCAGAAGAATATAAAGAGGC	TGCGE	82	45819311; 15951267, 45808848, 45811065, 45814048, 45821063
			R - TGGAATCTCTGTTATTAAGCACTTTG
UN	-	E8A6	F - CACCTCTGTGTACCTCTACATTTACC	TGCGE	87	45832517, 45836783, 45845424; 45807122, 45815698, 51004832, 51010535
			R - TTAAAGCTACACTGAAAGTATGTGGG
UN	-	E9A12	F - TGAGGAGGCATTGAAAGACC	TGCGE	77	45834732; 45813480, 50996505, 51007715
			R - TAGGAACCAGACGGTTCTCCTT
a – LG = linkage group. UN = marker is not linked to LG 1-14.
b – cM = centiMorgan position within linkage group.
c – ASA = allele specific amplification. SP = PCR fragment size polymorphism. PE = primer extension followed by primer extension probe sequence and diagnostic bases in parentheses (A. mexicanum/A. t. tigrinum). RD – Restriction digestion followed by diagnostic restriction enzyme. TGCGE = thermal gradient capillary gel electrophoresis.
d - NCBI GI numbers are provided as a comma delimited list. Lists of GIs that correspond to A. mexicanum and A. t. tigrinum are separated by a semicolon. NA = previously published markers without NCBI GI numbers (Voss et al, 2001).
