# Supplementary material for: A Comprehensive Expressed Sequence Tag Linkage Map for Tiger Salamander and Mexican Axolotl: Enabling Gene Mapping and Comparative Genomics in Ambystoma
Source: Oxford University Press journal article supplement (doi:10.1534/genetics.105.046433), 2005-08-04
Supplement: supplementary_table_3.xls [file supplementary_table_3.xls]

## Sheet: Sheet1
LGa	cMb	Marker	RefSeq ID	E-value	bitscore	Hs Name
1	0	E20A12	NP_003452	1.3e-72	269.6	zyxin
1	45	G2M17	NP_066299	6.2e-67	250.8	smooth muscle and non-muscle myosin alkali light chain isoform 1
1	63.1	Gapdh	NP_002037	5.8e-51	195.7	glyceraldehyde-3-phosphate dehydrogenase
1	66.7	E24C6	NP_057246	2e-106	382.9	inhibitor of growth family, member 4 isoform 1
1	71.9	E5G11	NP_002037	3.3e-31	131	glyceraldehyde-3-phosphate dehydrogenase
1	95.9	E23C5	NP_056153	1.8e-18	88.97	additional sex combs like 1
1	107.8	cntg26	NP_463460	9e-50	194.5	FK506-binding protein 1A
1	126.3	E24C10	NP_536350	9.5e-27	117.1	guanine nucleotide binding protein, alpha stimulating activity
1	153.8	E20C6	NP_000299	0	636	protective protein for beta-galactosidase
1	160.6	E22E10	NP_954595	1e-69	260.8	ubiquitin-conjugating enzyme E2 variant 1 isoform a
1	160.6	E6G8	NP_003270	1.8e-66	249.2	fast skeletal muscle troponin C
1	188.5	E7G8	NP_066018	2.4e-46	183.7	nuclear receptor coactivator 5
1	212.7	E20G12	NP_005442	1.6e-25	113.6	enigma protein isoform 1
1	222.9	E8C10	NP_059980	4e-110	394.4	transmembrane emp24 protein transport domain containing 9
1	224	E21G9	NP_003177	1.4e-21	101.3	transgelin
1	235.2	E20A6	NP_004951	4.2e-64	242.7	fusion (involved in t(12;16) in malignant liposarcoma) isoform a
1	241.3	E18E8	NP_937818	1.3e-63	240.7	nucleoside-diphosphate kinase 1 isoform a
1	242.6	E10C9	NP_937818	1.3e-63	240.7	nucleoside-diphosphate kinase 1 isoform a
1	242.6	E19C4	NP_059447	0	738.8	major vault protein
1	242.6	E8C1	NP_908932	0	639	aldolase A
1	260.5	E19C1	NP_908932	0	639	aldolase A
1	297.8	E22C12	NP_660215	1e-12	70.09	tripartite motif-containing 11
1	342.4	E7A6	NP_053582	2.2e-42	165.2	BCL2/adenovirus E1B 19kD interacting protein 1 isoform BNIP1-b
1	352.4	E20G3	NP_055217	4.1e-21	97.06	low molecular mass ubiquinone-binding protein
1	401	E18C5	NP_112556	1.3e-90	330.9	heterogeneous nuclear ribonucleoprotein AB isoform a
1	461.4	E19E4	NP_057141	1.1e-90	330.9	coatomer protein complex, subunit zeta 1
1	477	Hoxc10	NP_059105	2e-110	396.7	homeo box C10
1	487.1	E18A10	NP_000415	2e-150	530.4	keratin 5
1	487.1	E18A12	NP_000415	5e-137	485.7	keratin 5
1	489.7	E23G3	NP_006803	1.6e-31	132.9	amplified in osteosarcoma isoform 1 precursor
1	507.9	E9E7	NP_066299	8.5e-57	216.9	smooth muscle and non-muscle myosin alkali light chain isoform 1
1	516.1	Wnt1	NP_005421	7e-169	591.7	wingless-type MMTV integration site family, member 1 precursor
1	534.2	E21G8	NP_006704	2.5e-34	142.9	activated RNA polymerase II transcription cofactor 4
1	544.6	cntg116	NP_003109	9e-142	500.7	secreted protein, acidic, cysteine-rich (osteonectin)
1	564.7	E5C5	NP_000289	1.9e-92	293.5	pyruvate kinase, liver and RBC isoform 1
1	576.4	E20C7	NP_002464	4.8e-34	142.5	myosin, heavy polypeptide 9, non-muscle
1	597.8	E9C4	NP_003007	4.7e-39	159.5	splicing factor, arginine/serine-rich 2
1	729.6	ETG990	NP_004387	0	826.2	DEAD (Asp-Glu-Ala-Asp) box polypeptide 5
1	735.7	E24E9	NP_733938	2.2e-24	109.4	potassium inwardly-rectifying channel J16
1	742.4	E24G7	NP_066383	4.9e-24	107.8	zinc finger protein 248
1	755.4	E6C6	NP_000909	3e-170	595.5	prolyl 4-hydroxylase, beta subunit
1	766.5	E22A7	NP_006247	3.2e-15	78.18	protein kinase N2
1	772.9	E13A5	NP_060624	3.8e-10	61.62	ASF1 anti-silencing function 1 homolog B
1	798.9	E24E3	NP_003322	1.7e-35	146.4	tyrosine kinase 2
1	803.4	E11C1	NP_612367	3.7e-51	198.4	hypothetical protein LOC90580
1	803.4	E7C12	NP_115753	5e-34	141.4	elongation factor 1 homolog (ELF1, S. cerevisiae)
1	806.9	E10A4	NP_004452	1e-136	483	phenylalanine-tRNA synthetase-like protein
1	815.5	G2I16	NP_004936	8.4e-71	261.9	dynamin 2 isoform 3
1	836.7	E19C7	NP_003676	9e-106	266.5	KH-type splicing regulatory protein (FUSE binding protein 2)
1	-	E23A11	NP_113665	1.3e-65	246.1	yippee-like 3
1	-	E6A3	NP_463460	5.8e-50	194.5	FK506-binding protein 1A
1	-	G1J9	NP_000356	6e-117	310.8	triosephosphate isomerase 1
2	0	E9E9	NP_006704	2.5e-34	142.9	activated RNA polymerase II transcription cofactor 4
2	25.8	E10C6	NP_057191	1.1e-69	260.4	zinc finger RNA binding protein
2	28.2	E23A7	NP_005594	3.7e-91	331.6	ATPase, Class I, type 8B, member 1
2	35.3	E11E7	NP_002158	1.4e-29	126.3	inhibitor of DNA binding 3
2	92.4	E24E10	NP_000850	1.3e-28	123.2	3-hydroxy-3-methylglutaryl-Coenzyme A reductase
2	167.5	E7G11	NP_000691	2e-123	439.9	annexin I
2	168.6	E6C12	NP_000691	2e-118	423.3	annexin I
2	171.6	Slc4a5	NP_003750	0	1721.4	solute carrier family 4, sodium bicarbonate cotransporter, member
2	173.1	E9G2	NP_000691	1e-114	410.6	annexin I
2	226.4	E20A10	NP_006562	1.8e-88	198.4	dynactin 6
2	260.3	E19A9	NP_003007	4.7e-39	159.5	splicing factor, arginine/serine-rich 2
2	264.4	E26G7	NP_002824	2e-41	165.6	protein tyrosine phosphatase, non-receptor type 9
2	265.7	E7C6	NP_057565	8.3e-77	283.1	hypothetical protein LOC51531
2	293.2	E20G10	NP_115679	2.7e-30	123.2	hydroxysteroid dehydrogenase like 2
2	301.1	E10C5	NP_002865	3e-34	141.7	UV excision repair protein RAD23 homolog B
2	301.1	E26G3	NP_002865	3e-34	141.7	UV excision repair protein RAD23 homolog B
2	310.8	E25C12	NP_115936	1.3e-37	153.3	short coiled-coil protein
2	314.4	E23A12	NP_149106	1e-27	119.8	hypothetical protein LOC93627
2	401.8	E20A2	NP_004559	3e-124	442.2	serine (or cysteine) proteinase inhibitor, clade B (ovalbumin),
2	404.1	E23E3	NP_004964	1.7e-74	275.8	jumonji, AT rich interactive domain 2 protein
2	413.8	E20A5	NP_110437	4e-88	298.1	thioredoxin domain containing 5 isoform 1
2	463.3	E9E1	NP_068832	1.2e-12	69.71	thymosin-like 8
2	472.6	E25E1	NP_057059	1.6e-15	79.34	TBP-associated factor 9L
2	479.6	E21G10	NP_001440	2e-144	509.6	four and a half LIM domains 1
2	487.1	E15C4	XP_377060	8.6e-31	131	similar to 2610030H06Rik protein
2	539.2	E20A9	NP_004860	3.4e-47	175.6	vacuolar protein sorting factor 4B
2	553.9	E8E9	NP_004385	1.7e-33	139.4	death-associated protein
2	579.1	E20G6	NP_683725	2.4e-52	162.5	cytochrome b-5 isoform 1
2	595.2	E23E12	NP_116038	1.7e-25	112.5	carnosinase 1
2	638.5	E19E7	NP_291024	3.1e-84	308.5	myosin regulatory light chain MRCL2
2	675.7	G2I21	NP_076962	1.7e-38	153.7	nucleoporin 37kDa
2	704.1	E24C11	NP_000058	1e-100	364	carbonic anhydrase II
2	738.5	E9E6	NP_004996	1e-66	249.6	NADH dehydrogenase (ubiquinone) 1 beta subcomplex, 9, 22kDa
2	-	E22E5	NP_036398	6.2e-37	150.6	DnaJ (Hsp40) homolog, subfamily B, member 5
2	-	E23E4	NP_057289	3.4e-78	288.1	platelet-derived growth factor C precursor
2	-	E27E10	NP_060867	1.4e-26	116.3	choline dehydrogenase
2	-	E6G5	NP_112552	2e-124	443.7	heterogeneous nuclear ribonucleoprotein K isoform b
2	-	Kit	NP_000213	0	728	v-kit Hardy-Zuckerman 4 feline sarcoma viral oncogene homolog
3	22	E9E3	NP_005709	4.6e-88	322.4	actin related protein 2/3 complex subunit 4
3	23.4	E21C8	NP_005709	4.6e-88	322.4	actin related protein 2/3 complex subunit 4
3	33.4	E23G8	NP_004148	4.8e-36	147.1	cAMP-dependent protein kinase, regulatory subunit alpha 2
3	50.3	E21A4	NP_037468	3.9e-48	188.7	Sec61 alpha 1 subunit
3	126.9	E7G12	NP_001055	1.2e-93	340.1	transketolase
3	129.1	E10E9	NP_001448	1.1e-55	213	filamin B, beta (actin binding protein 278)
3	130.3	E19A10	NP_001448	9e-74	273.5	filamin B, beta (actin binding protein 278)
3	157.2	E10E2	NP_003409	5.4e-89	323.9	zinc finger protein 9
3	164.1	E21A3	NP_009215	3.3e-97	352.8	twinfilin-like protein
3	171.6	GNAT1	NP_005263	0	633.6	guanine nucleotide binding protein, alpha transducing activity
3	171.6	Rho	NP_000530	5e-169	590.9	rhodopsin
3	182.1	E20C5	NP_001655	2.4e-36	149.1	ras homolog gene family, member A
3	189.9	E18C6	NP_004868	1.3e-69	260	glia maturation factor, gamma
3	194.7	E18C7	NP_001740	3.3e-88	322.8	calpain, small subunit 1
3	197	E8C9	NP_005315	1.7e-71	265	H3 histone, family 3B
3	205	E28A6	NP_000760	8.5e-41	163.7	cytochrome P450, family 2, subfamily C, polypeptide 19
3	223.4	E9G8	NP_808210	4.9e-52	200.7	small nuclear ribonucleoprotein polypeptide D2
3	258.4	Foxa3	NP_068556	4.2e-95	346.7	forkhead box A2
3	262.2	E24E4	NP_003851	1.1e-39	160.2	barrier to autointegration factor 1
3	262.2	E8A9	NP_619579	1.6e-25	113.6	cofilin 2
3	264.6	E23C10	NP_000923	7.4e-36	147.5	phospholipase C, beta 3 (phosphatidylinositol-specific)
3	265.9	E18G2	NP_619579	1.6e-25	113.6	cofilin 2
3	275.6	E25C2	NP_569710	1.3e-18	89.74	dipeptidylpeptidase III isoform 2
3	275.6	E29A6	NP_005177	2.7e-79	292	calpain 1, large subunit
3	275.6	E6E2	NP_005177	2.7e-79	292	calpain 1, large subunit
3	275.6	E9G12	NP_005600	6e-125	444.5	glycogen phosphorylase
3	280.2	Calm3	NP_008819	1.5e-78	291.2	calmodulin 1
3	280.2	E10G4	NP_036226	6.3e-59	224.2	peroxiredoxin 5 precursor, isoform a
3	280.2	E12A8	NP_008819	1.5e-78	291.2	calmodulin 1
3	280.2	E6G4	NP_002887	4.2e-37	151.4	RNA binding motif protein 4
3	281.4	E19A4	NP_008819	1.5e-78	291.2	calmodulin 1
3	293.6	E17E9	NP_001702	2e-131	466.1	biglycan preproprotein
3	293.6	E21A5	NP_001702	2e-131	466.1	biglycan preproprotein
3	294.7	E7A8	NP_002901	7.6e-15	77.03	renin binding protein
3	294.7	E9G11	NP_115512	8e-126	447.6	similar to transketolase
3	311.8	E6C5	NP_001092	0	753.4	beta actin
3	311.8	E7G7	NP_001605	0	749.6	actin, gamma 1 propeptide
3	315.3	E18G5	NP_001092	0	420.2	beta actin
3	321.4	E18C8	NP_008839	6.8e-96	209.1	ras-related C3 botulinum toxin substrate 1 isoform Rac1
3	322.6	E7G2	NP_002845	4.5e-27	118.2	parvalbumin
3	333.2	ctg325	NP_002498	6.6e-41	164.9	nerve growth factor receptor precursor
3	343.2	E18E7	NP_000510	3.1e-39	158.3	delta globin
3	343.2	E5E4	NP_000510	1.7e-36	149.1	delta globin
3	343.2	E5E6	NP_000508	2.2e-27	73.94	alpha 2 globin
3	413.2	E10G12	NP_653171	2e-26	114.8	chromosome 16 open reading frame 34
3	413.2	E7C10	NP_001685	2e-60	229.2	ATPase, H+ transporting, lysosomal, V0 subunit c
3	420.7	E6C2	NP_001649	3e-100	362.5	ADP-ribosylation factor 1
3	431.7	E19G10	NP_005315	3e-71	265	H3 histone, family 3B
3	438.9	E7C8	NP_148983	5.5e-57	216.9	platelet-derived growth factor alpha, isoform 2, preproprotein
3	450.1	E10A8	NP_115875	1.8e-88	322	dynactin 4
3	455.3	E22G5	NP_003247	3.9e-08	55.07	tissue inhibitor of metalloproteinase 4 precursor
3	455.3	E25G1	NP_003247	4.7e-08	54.68	tissue inhibitor of metalloproteinase 4 precursor
3	527.9	E18G10	NP_000550	6.2e-31	130.6	A-gamma globin
3	531.7	E10A12	NP_000508	1.9e-37	152.1	alpha 2 globin
3	531.7	E18A3	NP_000508	1.9e-37	152.1	alpha 2 globin
3	557.3	HLP 1	NP_057671	1.4e-63	239.6	chromobox homolog 3
3	564.9	Hoxa4	NP_055436	1.5e-50	194.5	homeo box D4
3	564.9	Hoxa9	NP_689952	1.7e-62	234.6	homeobox protein A9 isoform a
3	589.5	E6C8	NP_004799	1e-21	100.1	glycylpeptide N-tetradecanoyltransferase 2
3	646.5	E19G3	NP_690006	2.5e-36	150.6	hypothetical protein LOC222166
3	646.5	E20E2	NP_060767	4.2e-38	154.8	N-glycanase 1
3	661.4	betaTH	NP_000452	0	704.1	thyroid hormone receptor, beta
3	-	E6E1	NP_003748	3e-180	627.9	eukaryotic translation initiation factor 3, subunit 2 beta, 36kDa
3	-	E7E5	NP_000550	6.2e-31	130.6	A-gamma globin
4	1.2	E8A1	NP_112553	3.6e-94	342	heterogeneous nuclear ribonucleoprotein K isoform a
4	6.9	E5A8	NP_002377	3e-32	134.8	melanocortin 1 receptor
4	12.7	E25E3	NP_000476	3.2e-63	238.8	adenine phosphoribosyltransferase
4	16.2	E23A1	NP_073729	5e-62	234.6	microtubule-associated proteins 1A/1B light chain 3
4	65.3	E24A11	NP_077274	1.8e-65	246.5	leukocyte receptor cluster (LRC) member 4 protein
4	71.1	E19G2	NP_001491	0	667.2	GDP-mannose 4,6-dehydratase
4	77.3	E6C7	NP_000225	4.4e-58	147.5	DNA ligase I
4	119.1	E20C1	NP_000166	3e-139	glucose phosphate isomerase
4	188.1	E19A2	NP_002023	2.6e-70	262.3	ferritin, heavy polypeptide 1
4	190.5	E8C8	NP_002023	7.4e-64	240.7	ferritin, heavy polypeptide 1
4	196.8	E25A8	NP_699160	4.6e-25	111.3	aldehyde dehydrogenase 16 family, member A1
4	204.3	E24A12	NP_777601	6.5e-12	67.78	scavenger receptor cysteine-rich type 1 protein M160 precursor
4	223.7	CoxV1b	NP_001854	2.1e-30	128.6	cytochrome c oxidase subunit VIb
4	229.6	E10G3	NP_005962	1.2e-20	97.83	FXYD domain containing ion transport regulator 3 isoform 1
4	233.2	E18A4	NP_006749	2.3e-93	339	U2 small nuclear RNA auxillary factor 1
4	235.5	ETG93	NP_057508	5.7e-19	90.51	cisplatin resistance-associated overexpressed protein
4	243.7	E8E1	NP_057490	5.4e-91	330.5	Ufm1-conjugating enzyme 1
4	295.9	E23E9	NP_003136	2.1e-59	225.3	signal sequence receptor, beta precursor
4	301.8	E6E5	XP_371630	3.4e-39	157.5	similar to ribosomal protein S27
4	301.8	E8A10	NP_705935	2.9e-88	322.4	tropomyosin 3
4	306.6	E26G10	NP_009044	7.2e-12	67.01	trichohyalin
4	312.4	E23G7	NP_062427	7.2e-10	60.46	S100 calcium-binding protein A4
4	330.5	E9A3	NP_112182	1.9e-66	249.2	acidic (leucine-rich) nuclear phosphoprotein 32 family, member E
4	336.6	E7C5	NP_006463	5.3e-25	101.7	thioredoxin interacting protein
4	362.3	E11G6	NP_112182	3.5e-66	249.2	acidic (leucine-rich) nuclear phosphoprotein 32 family, member E
4	392.9	bl005ba01	NP_055399	8.6e-09	38.12	ERO1-like
4	398.6	E5G10	NP_008817	1.2e-15	78.57	ATP synthase, H+ transporting, mitochondrial F1 complex, epsilon
4	405.7	E23C6	NP_060267	4.5e-64	240.7	BTB (POZ) domain containing 2
4	408.1	E8E5	NP_036467	2.6e-42	168.7	myosin IF
4	416.3	E5E7	NP_001952	0	1623.6	eukaryotic translation elongation factor 2
4	469.4	E15A1	NP_055699	1.3e-56	211.8	splicing factor, arginine/serine-rich 14
4	495.3	E19C8	NP_940991	4.8e-60	229.6	basigin isoform 2
4	502.4	E18C3	NP_001271	8.4e-31	131	cold inducible RNA binding protein
4	503.6	E10C1	NP_001271	8.4e-31	131	cold inducible RNA binding protein
4	519.2	E10C11	NP_001298	6.3e-84	308.5	claudin 7
4	531.8	cntg66	NP_001407	0	733.4	eukaryotic translation initiation factor 4A, isoform 1
4	-	E10A7	NP_065120	5.7e-81	297.7	RAB25
4	-	E14G4	NP_006818	1.8e-91	333.6	transmembrane trafficking protein
5	112.3	E9C9	NP_060247	3e-13	72.02	hypothetical protein LOC54903
5	116.9	E22E3	NP_001474	1e-105	nipsnap homolog 2
5	119.5	E9A6	NP_000932	5.9e-34	142.5	P450 (cytochrome) oxidoreductase
5	123.1	E5G5	NP_057144	1.2e-56	216.5	mediator of RNA polymerase II transcription, subunit 31 homolog
5	181.8	E10C3	NP_004584	2.3e-53	205.7	splicing factor, arginine/serine-rich 10 (transformer 2 homolog,
5	198.4	E20A8	NP_008867	2.6e-41	165.6	small ubiquitin-like modifier protein 3
5	203	E7A11	NP_008867	2.6e-41	165.6	small ubiquitin-like modifier protein 3
5	212.3	E22G12	NP_000454	2e-123	439.1	UDP glycosyltransferase 1 family, polypeptide A1 precursor
5	213.5	E14E8	NP_001839	1.4e-53	207.6	collagen, type VI, alpha 1 precursor
5	227	Hoxd11	NP_067015	2.1e-83	307.4	homeo box D11
5	227	Hoxd8	NP_062458	2.2e-46	179.9	homeo box D8
5	231.6	E23G2	NP_078859	6.2e-27	117.5	secernin 3
5	245.6	E26A8	NP_005159	9.8e-48	186.4	ras homolog gene family, member E
5	281.3	E26C11	NP_000776	7.9e-18	86.27	cytochrome P450, family 27, subfamily B, polypeptide 1
5	294.9	E24C3	NP_775903	1.4e-08	45.82	hypothetical protein LOC284309
6	0	G1-I8	NP_005401	1.6e-10	64.7	selenoprotein P precursor
6	10.3	E24G11	NP_006651	8e-115	411	ClpX caseinolytic protease X homolog
6	34.3	E7C1	NP_001473	2e-162	568.9	glycine amidinotransferase (L-arginine
6	45.2	E9A11	NP_115990	1.5e-61	232.6	methylmalonyl-CoA epimerase
6	51.5	E19E5	NP_002739	0	566.6	mitogen-activated protein kinase 6
6	57.6	E24C12	NP_060827	1.5e-13	73.17	acheron isoform 1
6	98.8	E24G3	NP_004654	2.8e-22	102.1	Ras-related protein Rab-11A
6	98.8	E7C4	NP_004654	2.8e-22	102.1	Ras-related protein Rab-11A
6	99.9	E24G9	NP_005069	8.6e-09	57.38	transducin-like enhancer protein 3
6	229.4	G2G14	NP_981946	4.3e-41	165.2	stathmin 1
6	241	E23E11	NP_071440	4e-36	147.5	Ras-related GTP binding C
6	251.7	E25G7	NP_000387	2.9e-14	75.1	cathepsin K preproprotein
6	258.6	brachyury	NP_003172	5e-127	452.6	transcription factor T
6	258.6	E9E11	NP_112576	3.6e-27	117.9	SH3 domain binding glutamic acid-rich protein like 3
6	292.1	E8A7	NP_057180	1.9e-16	82.42	HSPC038 protein
6	293.3	E16C8	NP_005057	5e-150	528.9	splicing factor proline/glutamine rich (polypyrimidine tract
6	308.6	G1D6	NP_036448	3.1e-30	128.6	karyopherin alpha 6
7	25.8	E26G9	NP_004780	5e-15	77.03	LIM homeobox protein 2
7	102.8	E22C3	NP_056271	6.1e-43	171	cofactor of BRCA1
7	186.3	E19G7	NP_004087	1.7e-26	117.1	eukaryotic translation initiation factor 4E binding protein 2
7	207.7	E21G12	NP_001782	3e-107	385.6	cell division cycle 42 isoform 1
7	216.4	E22A3	NP_003366	2e-139	492.7	voltage-dependent anion channel 2
7	239.7	E9E10	NP_665876	1e-119	427.2	annexin A11
7	260.3	E18E11	NP_059453	1.5e-48	191	microfibrillar-associated protein 2 precursor
7	261.5	v2p3a5	NP_057389	1.6e-27	119	synovial sarcoma translocation gene on chromosome 18-like 2
7	273.8	E7G9	NP_054775	2.9e-32	136	DKFZP564K247 protein
7	278.8	E6A11	NP_060934	5.1e-30	127.5	hypothetical protein LOC55847
7	-	E8C11	NP_008819	7.9e-81	297	calmodulin 1
7	-	torsina	NP_000104	2.9e-38	154.1	torsin A
8	13.9	E8A2	NP_003760	1.2e-84	310.1	splicing factor, arginine/serine-rich 9
8	15.1	E7G10	NP_003737	1.5e-45	179.1	cytoplasmic dynein light polypeptide
8	19.7	E29C4	NP_057322	1.2e-55	213	anaphase-promoting complex subunit 7
8	20.8	E14G3	NP_000962	2.6e-94	342.8	ribosomal protein L7
8	64.1	E20C8	NP_005406	1.9e-96	349	solute carrier family 20 (phosphate transporter), member 1
8	65.3	E19A11	NP_005720	1.5e-71	266.2	peptidylprolyl isomerase F precursor
8	66.5	E17G2	NP_060715	3.1e-09	58.92	oxoglutarate dehydrogenase-like
8	66.5	E19A12	NP_071505	0	680.6	TIA1 protein isoform 2
8	66.5	E24C7	NP_060715	3.1e-09	58.92	oxoglutarate dehydrogenase-like
8	66.5	v2p3b1	NP_067046	1.8e-65	246.1	myosin light chain 2a
8	86.5	E10A3	NP_004059	1e-126	449.9	adaptor-related protein complex 2, mu 1 subunit
8	87.8	E10G10	NP_937885	7e-88	320.1	eukaryotic translation initiation factor 4 gamma, 1 isoform 3
8	96.3	E18C10	NP_001961	2.1e-73	273.5	eukaryotic translation initiation factor 5A
8	106.3	pcna	NP_872590	2.4e-55	212.2	proliferating cell nuclear antigen
8	124.2	E21E4	NP_055213	1.7e-24	111.3	lysosomal-associated membrane protein 3
8	128	E11A8	NP_009148	1e-109	392.5	programmed cell death 10
8	148.6	E7C9	NP_055437	1.2e-41	167.2	BCSC-1 isoform 1
8	231.2	E27E7	NP_001271	2.8e-27	119	cold inducible RNA binding protein
8	255.4	E7A1	NP_067643	2.1e-28	122.9	PDZ and LIM domain 2 isoform 2
8	270.2	E7A3	NP_009204	5.3e-36	148.7	prohibitin 2
8	-	E12A10	NP_000415	5e-137	485.7	keratin 5
9	5.1	E27A3	NP_002813	1.3e-82	303.5	twinfilin isoform 1
9	22.5	E24A1	NP_060749	2.4e-11	65.47	transmembrane protein 19
9	30.9	ntf3	NP_002518	3.1e-45	176	neurotrophin 3 precursor
9	58.1	Wnt5B	NP_110402	0	648.7	wingless-type MMTV integration site family, member 5B precursor
9	59.3	E8E2	NP_689654	4.8e-66	248.1	F-box and leucine-rich repeat protein 14
9	61.7	E30G6	NP_055154	1.9e-17	85.89	interleukin 17 receptor precursor
9	78.4	E6G10	NP_665807	9.2e-48	187.6	myotrophin
9	86.6	E6E12	NP_036311	2.4e-35	145.2	F-box only protein 7
9	105.8	G2K2	NP_066408	5.9e-54	207.2	H2A histone family, member P
9	107.5	E19C9	NP_066408	1e-53	207.2	H2A histone family, member P
9	119.8	E9A7	NP_003338	2e-57	219.2	ubiquitin-conjugating enzyme E2L 3 isoform 1
9	121	E20G2	NP_001322	5.1e-34	142.9	catenin (cadherin-associated protein), delta 1
9	121	E8G1	NP_057043	9.9e-25	111.3	thioredoxin-related transmembrane protein 2
9	129.2	E17C5	NP_004070	1.6e-45	147.5	cathepsin S preproprotein
9	129.2	E8G11	NP_787080	4.8e-14	75.87	hypothetical protein LOC168455
9	136.5	E23G6	NP_005286	2.1e-21	98.21	G protein-coupled receptor 22
9	151.9	E20G5	NP_002639	1.1e-97	353.6	pim-1 oncogene
9	154.3	E10E3	NP_002336	4e-124	442.6	lumican precursor
9	155.5	E19E8	NP_002336	4e-124	442.6	lumican precursor
9	159	E23G1	NP_002574	9.7e-21	96.67	PRKC, apoptosis, WT1, regulator
9	166.4	E10G2	NP_000221	1.1e-18	90.51	leptin precursor
9	170.1	UV	NP_001699	3e-151	532.7	opsin 1 (cone pigments), short-wave-sensitive (color blindness,
9	176.4	E6A12	NP_055205	6.1e-91	330.5	staphylococcal nuclease domain containing 1
9	191.5	E18E3	NP_006000	0	785	tubulin, alpha 3
9	206.5	E8C7	NP_055069	3.3e-63	237.7	transmembrane protein 5
9	-	Mgfa	NP_000890	3.7e-27	120.6	KIT ligand isoform b precursor
10	0	E22A41	NP_003608	1.9e-71	266.5	regulator of G-protein signalling 5
10	0	E23A10	NP_004521	5.6e-49	190.7	matrix metalloproteinase 2 preproprotein
10	6.4	E24C2	NP_008937	5e-115	411.4	cleavage and polyadenylation specific factor 5
10	67.5	E20C4	NP_004896	5.3e-90	327.4	peroxiredoxin 6
10	75	E24A6	NP_008825	4e-21	98.21	flavin containing monooxygenase 3 isoform 1
10	84.6	E20C2	NP_004883	3e-104	376.3	vesicle trafficking protein sec22b
10	97	E20C3	NP_005708	2.3e-70	262.3	actin related protein 2/3 complex subunit 5
10	100.5	E7A7	NP_002056	2.5e-85	311.2	glutamate-ammonia ligase (glutamine synthase)
10	105.3	E5G4	NP_036260	6.1e-21	97.83	calcium activated chloride channel 4
10	117.5	E5G1	NP_005265	4.1e-25	110.9	guanine nucleotide binding protein (G protein), gamma 5
10	118.7	E26G8	NP_004252	2.5e-52	202.2	15 kDa selenoprotein isoform 1 precursor
10	136.3	E9E8	NP_004252	2.5e-52	202.2	15 kDa selenoprotein isoform 1 precursor
10	156.9	E21C6	NP_004759	6.4e-84	308.9	splicing factor p54
10	174.7	E7G1	NP_002780	4e-120	427.9	proteasome alpha 4 subunit
10	200.2	E20E4	NP_002970	3.5e-66	248.4	sterol carrier protein 2 isoform 1 proprotein
10	222.9	E25A12	XP_375726	4.5e-11	64.7	KIAA0494 gene product
11	10.3	GNAT2	NP_653082	2e-178	622.9	guanine nucleotide binding protein, alpha transducing activity
11	21.1	E21C7	NP_003920	9.9e-16	81.26	RAB7, member RAS oncogene family-like 1
11	41.8	E9C11	NP_006126	3e-141	499.2	F-actin capping protein alpha-1 subunit
11	63	E11C3	NP_009035	8e-103	369.8	ribosomal protein L10a
11	71.5	E20G11	NP_064526	2.5e-35	145.2	hypothetical protein LOC56900
11	72.6	E9C2	NP_003822	5e-102	367.5	sudD suppressor of bimD6 homolog isoform 1
11	76.2	E9G1	NP_000995	1.2e-20	96.67	ribosomal protein P2
11	94.3	E19E12	NP_002862	4.3e-50	195.7	RAB-interacting factor
11	107.8	E25E5	NP_004554	2.3e-46	182.2	mitochondrial phosphoenolpyruvate carboxykinase 2 isoform 1
11	122.8	E10A2	NP_005901	1.1e-12	69.32	microtubule-associated protein tau isoform 2
11	136	E6E11	NP_054738	5.2e-27	117.5	HSPC009 protein
11	139.7	E11C5	NP_001649	3e-100	361.3	ADP-ribosylation factor 1
11	145.7	Col1A	NP_000079	9e-128	453.8	alpha 1 type I collagen preproprotein
11	149.6	Dlx3	NP_005211	8.9e-89	324.7	distal-less homeo box 3
11	167.1	E18A9	NP_000214	5e-112	402.9	keratin 12
11	171.6	Krt17	NP_000413	2e-146	516.9	keratin 17
11	171.6	Krt24	NP_061889	3.7e-08	56.61	keratin 24
11	171.6	Rpl19	NP_000972	1.4e-67	252.7	ribosomal protein L19
11	171.6	Thra	NP_955366	0	713.4	thyroid hormone receptor, alpha isoform 1
11	176.9	E9A10	NP_075567	2.2e-42	169.1	hypothetical protein LOC65264
11	178	Hoxb13	NP_006352	1.6e-59	227.3	homeo box B13
11	180.2	E22G4	NP_003195	1.2e-57	219.9	nuclear factor (erythroid-derived 2)-like 1
11	190.4	E6E7	NP_987096	1.5e-22	102.8	kelch-like ECH-associated protein 1
12	0	E5A9	NP_055438	6e-30	127.9	male-enhanced antigen
12	8.7	E9E4	NP_057184	2.3e-98	354.8	N-acetyltransferase 5 isoform a
12	42.8	E6G1	NP_001928	1.1e-87	319.7	dermatopontin precursor
12	95.3	E14A6	NP_001403	1.8e-52	204.9	X-linked eukaryotic translation initiation factor 1A
12	117	E11E8	NP_000977	6.9e-54	206.8	ribosomal protein L24
12	130.6	E5A5	NP_000264	2.6e-46	181.8	G protein-coupled receptor 143
12	211.4	E7E3	NP_694950	1.5e-20	96.29	hypothetical protein LOC144811
13	26.2	E10C8	NP_057205	2.1e-40	162.5	potassium channel tetramerisation domain containing 3
13	64.2	E20E3	NP_062539	7.7e-89	324.7	hypothetical protein LOC56261
13	74.1	E8G8	NP_775269	4.7e-36	89.35	nuclear DNA-binding protein
13	78.8	E23A2	NP_775269	4.7e-36	89.35	nuclear DNA-binding protein
13	120.3	E24E1	NP_001094	2.6e-16	82.42	actinin, alpha 2
13	155.6	E24A5	NP_002435	1.4e-20	97.83	moesin
14	0	E7A5	NP_036265	1.1e-14	75.87	coatomer protein complex, subunit gamma 2
14	31.3	ctg1459	NP_006423	1.2e-45	179.9	Niemann-Pick disease, type C2 precursor
14	31.3	E20E5	NP_006423	2.2e-45	179.5	Niemann-Pick disease, type C2 precursor
14	31.3	E26A9	NP_057556	3.3e-49	191.8	hypothetical protein LOC51527
14	31.3	E7E9	NP_057556	3.3e-49	191.8	hypothetical protein LOC51527
14	31.3	ETG926	NP_057556	7e-50	194.5	hypothetical protein LOC51527
14	32.6	ctg1381	NP_057046	1.8e-98	356.3	hypothetical protein LOC51077
14	105	E12C11	XP_375085	1e-33	139.8	tRNA-(N1G37) methyltransferase
UN	-	ctg1717	NP_002267	9.1e-42	168.7	keratin 19
UN	-	E10A10	NP_001688	1.3e-69	259.6	mitochondrial ATP synthase, O subunit precursor
UN	-	E10A9	NP_055567	5.6e-58	220.7	signal peptidase complex subunit 2 homolog
UN	-	E10E7	NP_005498	1.7e-60	229.2	cofilin 1 (non-muscle)
UN	-	E10G9	NP_296374	7.4e-61	228.8	ribosomal protein L34
UN	-	E11E2	NP_004976	2.4e-78	288.1	c-K-ras2 protein isoform b
UN	-	E12A10	NP_000415	5e-137	485.7	keratin 5
UN	-	E13E10	NP_036609	7.8e-21	99.37	WW domain binding protein 1
UN	-	E14G4	NP_006818	1.8e-91	333.6	transmembrane trafficking protein
UN	-	E18A1	NP_000357	2e-107	386.3	tropomyosin 1 alpha chain isoform 5
UN	-	E18E2	NP_004361	3e-26	116.7	alpha 1 type XII collagen long isoform precursor
UN	-	E18G12	NP_004796	4.5e-37	151	DNA directed RNA polymerase II polypeptide D
UN	-	E19A1	NP_002023	8.9e-71	263.8	ferritin, heavy polypeptide 1
UN	-	E19C11	NP_031381	0	1145.2	heat shock 90kDa protein 1, beta
UN	-	E19G4	NP_002362	1.2e-47	187.6	T-lymphocyte maturation-associated protein isoform a
UN	-	E20A7	NP_000843	6.6e-52	201.1	glutathione transferase
UN	-	E20G9	NP_006577	2.3e-23	106.7	trinucleotide repeat containing 5
UN	-	E22A10	NP_057098	9.3e-29	123.6	chromosome 9 open reading frame 77
UN	-	E22C9	NP_004031	1e-103	373.6	ras homolog gene family, member B
UN	-	E22E1	NP_056326	4.6e-19	90.89	hypothetical protein LOC25980
UN	-	E22G9	NP_659499	2.6e-14	75.87	hypothetical protein LOC221302
UN	-	E23A5	NP_031379	7.7e-44	173.3	guanine nucleotide binding protein (G protein) alpha 12
UN	-	E23C11	NP_002989	7e-45	177.9	syndecan 2 precursor
UN	-	E24E2	NP_689508	1.5e-14	76.26	threonyl-tRNA synthetase
UN	-	E25C11	NP_075562	1.4e-11	49.68	hypothetical protein LOC65251
UN	-	E26C4	NP_064696	4.3e-56	214.5	microsomal glutathione S-transferase 1
UN	-	E26C9	NP_116307	1.7e-79	292.4	RAS-like, estrogen-regulated, growth inhibitor
UN	-	E26E1	NP_061969	1.6e-54	209.1	GTP binding protein 2
UN	-	E26E7	NP_872319	1.1e-24	110.2	spindle pole body component 24 homolog
UN	-	E5C11	NP_003207	3.3e-76	282.3	thyrotrophic embryonic factor
UN	-	E5C4	NP_000363	2.2e-33	138.3	tyrosinase (oculocutaneous albinism IA)
UN	-	E5E10	NP_003851	1.1e-39	160.2	barrier to autointegration factor 1
UN	-	E5E12	NP_054770	6.1e-25	110.5	transmembrane protein 14A
UN	-	E5G2	NP_031381	0	1145.2	heat shock 90kDa protein 1, beta
UN	-	E5G8	NP_958782	5.1e-60	227.3	plectin 1 isoform 6
UN	-	E6C4	NP_689604	6.8e-35	142.9	hypothetical protein LOC130814
UN	-	E6E6	NP_005013	1.1e-28	123.6	profilin 1
UN	-	E6G11	NP_006358	6.5e-68	253.8	adenylyl cyclase-associated protein
UN	-	E7A9	NP_001017	4.2e-42	167.2	ribosomal protein S24 isoform c
UN	-	E7E11	NP_004598	3e-33	137.5	beta-tubulin cofactor A
UN	-	E7E2	NP_000996	5e-126	447.2	ribosomal protein S3
UN	-	E8A6	NP_000387	4.5e-26	114.8	cathepsin K preproprotein
UN	-	E8E8	NP_690047	6.9e-44	173.7	transmembrane protein 18
UN	-	E9A12	NP_006696	4e-68	254.6	growth arrest and DNA-damage-inducible, gamma
UN	-	G1D7	NP_031389	3e-140	496.5	non-POU domain containing, octamer-binding
UN	-	G1I19	NP_008819	1.2e-78	291.6	calmodulin 1
UN	-	v3p1c11	NP_004833	4.5e-27	118.2	A-kinase anchor protein 7 isoform alpha
a – LG = linkage group. UN = marker is not linked to LG 1-14.
b – cM = centiMorgan position within linkage group.
